# Supplementary material for: Measuring the outcomes of volunteering for education: development and pilot of a tool to assess healthcare professionals’ personal and professional development from international volunteering
Source: PubMed Central journal article supplement — BMJ Open. 2019 Jul 17;9(7):e028206. doi: 10.1136/bmjopen-2018-028206 (PMC6661697; doi:10.1136/bmjopen-2018-028206), 2019-07-17
Supplement: bmjopen-2018-028206.draft_revisions.pdf [file bmjopen-2018-028206.draft_revisions.pdf]

# BMJ Open

BMJ Open is committed to open peer review. As part of this commitment we make the peer review history of every article we publish publicly available.

When an article is published we post the peer reviewers' comments and the authors' responses online. We also post the versions of the paper that were used during peer review. These are the versions that the peer review comments apply to.

The versions of the paper that follow are the versions that were submitted during the peer review process. They are not the versions of record or the final published versions. They should not be cited or distributed as the published version of this manuscript.

BMJ Open is an open access journal and the full, final, typeset and author-corrected version of record of the manuscript is available on our site with no access controls, subscription charges or pay-per-view fees (<http://bmjopen.bmj.com>).

If you have any questions on BMJ Open's open peer review process please email [info.bmjopen@bmj.com](mailto:info.bmjopen@bmj.com)

# BMJ Open

## Measuring the Outcomes of Volunteering for Education: Development and pilot of a tool to assess health professionals' personal and professional development from international volunteering

|                               |                                                                                                                                                                                                                                                                 |
|-------------------------------|-----------------------------------------------------------------------------------------------------------------------------------------------------------------------------------------------------------------------------------------------------------------|
| Journal:                      | <i>BMJ Open</i>                                                                                                                                                                                                                                                 |
| Manuscript ID                 | bmjopen-2018-028206                                                                                                                                                                                                                                             |
| Article Type:                 | Research                                                                                                                                                                                                                                                        |
| Date Submitted by the Author: | 27-Nov-2018                                                                                                                                                                                                                                                     |
| Complete List of Authors:     | Tyler, Natasha; University of Nottingham Business School<br>Collares, Carlos; Maastricht University , School of Health Professions Education<br>Byrne, Ged; Health Education England<br>Byrne-Davis, Lucie; University of Manchester, Manchester Medical School |
| Keywords:                     | MEDICAL EDUCATION & TRAINING, International health services < HEALTH SERVICES ADMINISTRATION & MANAGEMENT, Human resource management < HEALTH SERVICES ADMINISTRATION & MANAGEMENT, Quality in health care < HEALTH SERVICES ADMINISTRATION & MANAGEMENT        |
|                               |                                                                                                                                                                                                                                                                 |

SCHOLARONE™  
Manuscripts



## **Abstract**

**Objective:** The development and pilot of a self-report questionnaire, to assess personal and professional development gained through experiences in low and middle-income country health volunteering.

**Design** The instrument was developed from a core set of the outcomes of international placements for UK health professionals. Principle component analysis and multidimensional item response theory were conducted using results of a cross-sectional pilot study to highlight items with the best psychometric properties.

**Setting:** Questionnaires were completed both online and in multiple UK health professional events face-to-face.

**Participants:** 436 Healthcare professional participants from the UK completed a 110 item questionnaire in which they assessed their knowledge, skills and attitudes.

**Measures:** The 110 item questionnaire included self-report questions on a 7-point Likert scale of agreement, developed from the core outcome set, including items on satisfaction, clinical skills, communication and other important health professional knowledge, skills, attitudes and behaviours. Item reduction led to development of the 40-item Measuring the Outcomes of Volunteering for Education- Tool (MOVE-iT). Internal consistency was evaluated by the Cronbach  $\alpha$  coefficient. Exploratory analysis investigated the structure of the data using Principal Component Analysis and Multivariate Item Response Theory.

**Results:** Exploratory Analysis found 10 principle components that explained 71.80% of the variance. Components were labelled 'Team Work, Adaptability, Adapting Communication, Cultural Sensitivity, Difficult Communication, Confidence, Teaching, Management, Behaviour Change and Life Satisfaction'. Internal consistency was acceptable for the identified components ( $\alpha$  between 0.72 to 0.86).

**Conclusions:** A 40-item self-report questionnaire developed from a core outcome set for personal and professional development from international placements was developed, with evidence of good reliability and validity. This questionnaire will increase understanding of the impact of international placements for UK health professionals, facilitating comparisons of different types of experience. This will aid

1  
2  
3 35 decision making about whether and how UK health professionals should be  
4  
5 36 encouraged to volunteer internationally.  
6  
7  
8 37

9  
10 38 **Key Words**

- 11  
12  
13 39 • Personal and Professional Development  
14 40 • International Placements  
15  
16 41 • Volunteering  
17  
18 42 • Health Professionals  
19  
20 43 • Low and Middle Income Countries  
21  
22 44 • Principle Component Analysis  
23  
24 45 • Psychometric Tool  
25  
26 46 • Learning Assessment  
27  
28 47 • Self-Assessment

29  
30 48 **Article Summary**

31  
32 49 **Strengths and Limitations of this Study**

- 33  
34  
35 50 • The Measuring the Outcomes of Volunteering for Education- Tool (MOVE-  
36 51 iT) was developed based on evidence from peer-reviewed literature and  
37 52 expert opinion  
38  
39 53 • The underlying structures of the instrument were explored using a large  
40 54 data set of 436 multi-disciplinary health professionals  
41  
42 55 • The psychometric analyses demonstrate good internal consistency  
43  
44 56 reliability  
45  
46  
47

48 57 **Background**

49  
50 58 Globalisation of the health workforce has inevitably led to large numbers of qualified  
51 59 healthcare professionals choosing to temporarily work overseas in some capacity, with  
52 60 many choosing low resource environments in low and middle income countries (LMICs)  
53  
54 61 [1]. This is often perceived as a loss to the high income country, for example with the UK  
55  
56 62 National Health Service (NHS): a loss of staff within a service that is already under  
57  
58 63 pressure. Although, it has long been reported that such international placements are  
59  
60

1  
2  
3 64 thought to result in personal and professional development (PPD) and such skills can  
4 benefit both the individuals practice and subsequently patient outcomes upon return [2].  
5 65 Many report learning as a result of the new experience and particularly that working in a  
6 66 low resource environment encourages healthcare professionals to learn new skills in an  
7 67 effort to adequately adapt [3–5]. It is also believed that low resource settings provide staff  
8 68 with an opportunity to practice skills that they would not develop in domestic work setting,  
9 69 as such giving them increased confidence in their work [4, 6]. This includes exposure to  
10 70 higher numbers of clinical cases and often clinical cases that are more challenging than  
11 71 those seen in high income countries (HICs) as well as opportunities to lead, make  
12 72 decisions and work within new cultural and social norms [5, 7]. Many staff report a  
13 73 change in core attitudes or beliefs: a greater appreciation of caring, an acceptance of  
14 74 cultural differences or a changed/new/broader perspective [4, 5, 8, 9]. As a result, in the  
15 75 UK, some organisations have proposed that enabling and encouraging staff to work in low  
16 76 resource environments may have great benefits to the NHS [2, 3, 10] and have expressed  
17 77 a desire to assess PPD outcomes [11, 12] to provide quantitative evidence of benefit.  
18 78  
19 79

20 80 Research into the benefits of international working or volunteering (from now on referred  
21 81 to as ‘international placements’ for ease), has reported similar PPD outcomes across  
22 82 countries, projects and professions, including communication, leadership, team work,  
23 83 flexibility and cultural awareness [2, 4, 5, 13]. In a recent meta-synthesis and Delphi  
24 84 study, we reported a list of 116 outcomes [14] from a review of literature on international  
25 85 placements for healthcare professionals. The list included benefits and costs that would  
26 86 be likely to happen to a health professional of any cadre in an international placement.  
27 87

28 88 A small number of previous UK papers have used a questionnaire approach to learning  
29 89 [4, 15, 16] but these have not taken a psychometric approach to the measurement of  
30 90 underpinning domains of learning. A questionnaire developed in the USA, using latent trait  
31 91 analysis, found 11 ‘volunteer outcome’ factors including open-minded and intercultural  
32 92 relationships [17]. The USA questionnaire is not specifically about healthcare. In  
33 93 summary, no questionnaire exists, to our knowledge that attempts to measure the  
34 94 personal and professional outcomes for health professionals in international placements.  
35 95 A psychometric measure of these outcomes to evidence such benefits, could be  
36 96 imperative in changing perceptions of the perceptions of employing organisations and  
37 97 reducing barriers for individual staff that would like to undertake international placements.

1  
2  
3 98  
4  
5 99 This study aimed to create a measure of the PPD outcomes of international placements  
6  
7 100 by developing questions based on the core outcome set derived by Tyler et al., [14],  
8  
9 101 piloting these questions with a large sample of healthcare workers and using item  
10  
11 102 response theory to establish and test a set of latent traits and their associated questions.  
12  
13 103 In Item Response Theory, 'constructs' are theoretical terms that refer to unobserved,  
14  
15 104 idealised entities [18]. Latent traits are one type of construct, which are qualities  
16  
17 105 possessed by individuals that can change, but only over the long term [18]. Latent traits  
18  
19 106 include attitudes, preferences and dispositions, but also lots of the things that are  
20  
21 107 important for professional development such as ability, expertise and aptitude [19]. No  
22  
23 108 measure of a latent trait is ever considered perfectly accurate, instead different measures  
24  
25 109 are used to estimate latent traits [20], with varying levels of effectiveness [18].

## 24 110 **Methods**

### 26 111 **Participants**

29 112 We aimed to recruit 400 participants across 4 different groups: 100 health  
30  
31 113 professionals that had been on international placements in the past, 100 who were  
32  
33 114 about to undertake an international placement or currently working overseas, 100  
34  
35 115 with an interest in international placements but no past experience and 100 with no  
36  
37 116 interest in or past experience of international placements. We needed as many  
38  
39 117 health professionals as possible to complete the tool and it needed to be relevant for  
40  
41 118 those with and without international experience to get a full range of potential  
42  
43 119 answers on the questions. We aimed for this many participants because of previous  
44  
45 120 psychometric research on the sample size requirements for precise estimates of  
46  
47 121 reliability coefficients [21]. Inclusion criteria were that the participant be or have  
48  
49 122 been an NHS employee (current, past or future), working/worked in a patient facing  
50  
51 123 role as a qualified healthcare professional (some NHS admin and support staff were  
52  
53 124 excluded).

### 52 125 **Design**

55 126 We used a cross-sectional design, so participants were measured only at one time  
56  
57 127 point.

### 59 128 **Procedure**

## 129 **Creating the questionnaire**

130 We developed a questionnaire based on the core outcome set reported in our  
131 previous paper [14]. PPD outcomes include changes in experience, confidence and  
132 attitudes, so two members of the team (LBD,NT) developed statements in these  
133 categories, to be self-reported in terms of strength of agreement using a 7-point  
134 Likert scale. Where the core outcome reported in the previous paper, could be  
135 interpreted in multiple ways, we referred back to the original papers where the  
136 outcome was originally reported from the metasynthesis [14] and used this to make  
137 decisions about how to express the statement. If a statement could indicate change  
138 in experience, confidence and / or attitude, we developed multiple questions, using  
139 more than 1 of the 3 items (confidence, experience and attitudes).

## 140 **Pre-pilot**

141 The questionnaire was pre-piloted on a small group of returned volunteers, to  
142 establish that the questionnaire was readable and understandable. We administered  
143 the tool online using Manchester eForms [22]. The authors, plus a team of  
144 researchers in international placements, met to consider all of the written comments  
145 from the pilot plus their own opinions. We conducted a cognitive interview with four  
146 participants, using both think aloud interviewing and verbal probing [23, 24]. Any  
147 comments, issues, questions or suggestions raised during the cognitive interviews  
148 were inputted into a table, one member of the team (NT) decided how best to act on  
149 each one and whether changes needed to be made. The table was then reviewed by  
150 another team member (LBD) and disagreements were discussed and resolved.

## 151 **Pilot**

152 There were two methods of recruitment: online and face-to-face. Face-to-face  
153 participants were recruited using an opportunistic sample at health professional  
154 events nationwide, many of which had an international focus (the majority of the  
155 sample gained this way were nurses and HCAs). Online participants were recruited  
156 in numerous ways, including links to the questionnaire posted on international  
157 volunteering blogs and in health professional newsletters and bulletins. The majority  
158 of the online sample was gathered using a network technique, companies, projects  
159 and hospital health links that place professionals internationally agreed to send the  
160



1  
2  
3 160 link via email to health professionals, the majority of the doctors were responded  
4  
5 161 online.

6  
7 162 The tool was administered either online or face-to-face, as was convenient and  
8  
9 163 appropriate for the participants. Online participants received a link in an email, blog  
10  
11 164 or online community and after giving consent. Face-to-face participants completed a  
12  
13 165 paper version of the questionnaire. Recruitment took place between April and July  
14  
15 166 2016.

## 167 **Materials:**

### 168 **Measure**

169 The tool consisted of 110 statements measured on a 7-point Likert scale ranging  
170 from strongly agree to strongly disagree. The Likert scale contained the following  
171 descriptors: 1 Strongly Agree, 2, 3, 4 Neither Agree not Disagree, 5, 6, 7 Strongly  
172 Disagree (this was reverse coded for analysis as higher intensity ordinal constructs  
173 need to be higher values, strongly agree at 7, strongly disagree at 1). No statements  
174 were reversed. The statements questionnaire fell into 3 categories: Thinking about  
175 the last month, About you and Confidence. 'Thinking about the last month', was the  
176 largest section and contained 56 questions. For example: In the last month I  
177 demonstrated a good awareness about how culture influences health. The second,'  
178 About you' contained 35 questions and includes questions regarding an individual's  
179 skills, attitudes and knowledge. For example, I have an excellent work ethic. The  
180 final entitled 'Confidence', contained questions regarding an individual's  
181 confidence/competency. For example, I am confident in my abilities to allocate tasks  
182 and co-ordinate colleagues.

183 An additional existing scale was used within the tool, the satisfaction with life scale  
184 (SWLS) [25]. This is a five-item scale that has been used frequently to measure  
185 satisfaction with life. This replaced a number of statements from the core outcome  
186 set about satisfaction with life, since the questions had already been refined and  
187 tested for validity and reliability[25].

188 In addition to the 110 statements, participants demographic and placement data was  
189 also gathered. Each participant was asked basic demographic questions: age,

1  
2  
3 190 gender, profession, employment status, nationality and years since registration.  
4  
5 191 Past experience on international placements was also recorded.  
6  
7

## 8 192 **Analysis**

### 9 193 **Principal Component Analysis**

10  
11  
12 194 We used successive iterations of principal component analysis to reduce the pool of  
13  
14 195 items, so that only the items with optimal psychometric properties would remain.  
15  
16 196 Principal Component Analysis (PCA) is a dimension-reduction tool that can be used  
17  
18 197 to reduce a large set of items to a small set that still contains most of the information  
19  
20 198 in the large set (246). PCA is a mathematical procedure which can be used to  
21  
22 199 transform a large number of (possibly) correlated items into a smaller number of  
23  
24 200 uncorrelated variables called principal components. The first principal component  
25  
26 201 accounts for as much of the variability in the data as possible, and each succeeding  
27  
28 202 component accounts for as much of the remaining variability as possible. Initially, a  
29  
30 203 parallel analysis was performed to determine the number of factors. Items with low  
31  
32 204 communalities ( $<0.500$ ) or loadings below 0.3 were withdrawn in subsequent  
33  
34 205 iterations. In the final iterations, exclusions were performed at an item-by-item basis.

### 35 206 **Multidimensional Item Response Theory**

36  
37 207 A multidimensional item response theory (MIRT) model was created based on the  
38  
39 208 results of the best iteration of the principal component analysis. This is a model that  
40  
41 209 shows how the items in the self-assessment relate to the latent traits and the  
42  
43 210 correlational relationships between the traits and items. The multidimensional model  
44  
45 211 was used to show which items assess which latent variables. The MIRT model was  
46  
47 212 used to assess the latent factor structure of the final version of the questionnaire.  
48  
49 213 MIRT is analogous to confirmatory factor analysis (CFA) [26]. The most important  
50  
51 214 distinctive features of MIRT is the exemption of compliance to the multivariate  
52  
53 215 normality assumption needed for CFA as MIRT considers all Likert scale variables  
54  
55 216 as categorical. MIRT parameters in this study were estimated using weighted least  
56  
57 217 squares means- and variance-adjusted (WLSMV), given its appropriateness for  
58  
59 218 categorical variables in comparison to Bayesian estimation, which would be an  
60  
219 operationally attractive alternative, given the high dimensionality of the data [27].

1  
2  
3 220 Principal component analysis was performed in IBM SPSS 23 [28]. Multidimensional  
4 221 item response theory analysis was performed in Mplus 8 [29].  
5  
6  
7

8 222

9 223

## 11 224 **Results**

### 13 225 **Creating the Tool**

16 226 Two members of the team (LBD, NT) assessed each core outcome and generated  
17 227 103 statements with Likert scales of agreement for each statement (from strongly  
18 228 disagree to strongly agree). We excluded 40 items from the core outcome set which  
19 229 would not be measurable through self-report questionnaires. These were items  
20 230 about organisational outcomes for the NHS (8), outcomes that were too vague to be  
21 231 specifically defined (8) or overlapped in meaning with another and were combined  
22 232 (24). For example, '*exposure to ethical dilemmas*' and '*increased awareness*  
23 233 *of/knowledge about ethics*' were combined into '*I have frequently experienced ethical*  
24 234 *dilemmas*'. See additional files for a record of the decisions and their reasons.

31  
32 235 We therefore included 56 statements about the frequency which which the individual  
33 236 experienced something or exhibited certain behaviour. For example, 'In the last  
34 237 month I frequently experienced ethical dilemmas'. We generated 19 confidence  
35 238 statements. For example, 'I am confident in my ability to teach others'. Other  
36 239 statements, which were more about attitudes and feelings were labelled 'about you'  
37 240 and included, for example, 'I have an excellent work ethic', (n=35). Supplementary  
38 241 material shows the matches between the outcomes and statements.

### 45 242 **Pre-pilot**

47  
48 243 Sixteen participants completed the pilot questionnaire, including seven from the  
49 244 research group. Three participants completed cognitive interviews. This resulted in  
50 245 numerous changes being made to the statements, including using an existing life  
51 246 satisfaction scale (SWLS) and removing a statement that was unusual 'the UK is the  
52 247 best country in the world'. Reasons for any changes made are included in  
53 248 supplementary material. As a result of this process a 110-item tool was created for  
54 249 the pilot phase.  
55  
56  
57  
58  
59  
60

250 **Pilot**

251 **Participants**

252 Four hundred and thirty six participants completed the questionnaire, 42% (182/436)  
 253 participants had no international experience. The remainder of participants had  
 254 experience (169/436, 39%), or were overseas/due to depart at the time (79/436,  
 255 18%). Table 1 which shows the anticipated and actual participant groups, indicates  
 256 that the sample included an overrepresentation of participants with past international  
 257 experience and a slight underrepresentation of those currently overseas or no  
 258 international experience but interested.

259 **Table 1: Participants: Anticipated and Actual Numbers**

| Group                                       | Target     | N included (%)                                           | Percentage of target |
|---------------------------------------------|------------|----------------------------------------------------------|----------------------|
| Currently Overseas/Due to Depart            | 100        | 79 (18%)<br>(26 Currently Overseas.<br>53 Due to Depart) | 79%                  |
| Past International Experience               | 100        | 169 (39%)                                                | 169%                 |
| No International Experience- Interested     | 100        | 78 (18%)                                                 | 78%                  |
| No International Experience- Not Interested | 100        | 104 (24%)                                                | 104%                 |
| <b>Total</b>                                | <b>400</b> | <b>436 (100%)</b>                                        | <b>109%</b>          |

260  
 261 All participants were NHS employees (past or present). Table 2 shows that 34%  
 262 (148/436) categorised themselves as medical and dental (doctors), 31% (135/436)  
 263 nursing and midwifery, 15% (65/436) Allied health professionals, 7% support to  
 264 clinical staff (30/436), 3% Healthcare scientists (13/436) and 3% ambulance  
 265 (13/436). This is largely in line with the NHS North West employee data [30],  
 266 whereby 30% of the workforce is nursing and midwifery. The other staff groups were  
 267 also relatively proportionate, besides Medical and Dental which represents only 9%  
 268 of the North West workforce and support to staff (28%). Also NHS infrastructure  
 269 support was under-represented as we only recruited staff in patient facing roles.

270 Only 26% of the sample was male (113/436), 72% female (323/436). Table 3 shows  
 271 that the sample was well spread across working ages, 8% of the sample were under  
 272 25 (35/436), 18% 26-30 (78/436), 29% 31-40 (126/436), 19% 41-50 (83/436), 19%  
 273 51-60 (83/436), 7% 61-70 (30/436). The majority of the sample were employed full-  
 274 time (75%, 327/436), 17% part-time (74/436), 5% retired (22/436), 4% students (post  
 275 registration) (17/436) and <1% Unemployed, see Table 3. The majority of the  
 276 sample, that stated their nationality, considered themselves British (350/436, 83%)  
 277 however when dual British nationals and British devolution nations were included this  
 278 figure reached 87% (379/436). The remainder included 3% from Ireland/Northern  
 279 Ireland (13/436), 3% from the EU (13/436) and 7% from outside of the EU (30/436),  
 280 see Table 3. Data was missing for 14 participants. Regarding career stage, data  
 281 was missing from 47 participants, of those that stated their career stage, 25% were  
 282 early-career (97/386), having registered for the first time within the last 5 years, 24%  
 283 had over 25 years' experience (93/386), 35% had 6-15 years (136/386), 15% had  
 284 16-25 years (58/386), see Table 3.

285 **Table 2: Professions of participants**

| Staff group                               | n   | Pilot sample | NHSNW [30] |
|-------------------------------------------|-----|--------------|------------|
| Medical and Dental                        | 146 | 34%          | 9%         |
| Nursing and Midwifery                     | 135 | 31%          | 30%        |
| Allied Health Professionals               | 64  | 15%          | 6%         |
| Healthcare Scientists                     | 13  | 3%           | 3%         |
| Ambulance                                 | 13  | 3%           | 2%         |
| Support to clinical staff                 | 30  | 7%           | 28%        |
| NHS infrastructure support                | 5   | 1%           | 18%        |
| Other scientific, therapeutic & technical | 3   | 1%           | 4%         |
| Other                                     | 25  | 6%           | <1%        |

286

287 **Table 3: Participant Demographic Information: age, employment status,**  
 288 **nationality, gender and career stage (years since registration)**

289

290

| Age | n | Employment status | n | Nationality | n | Years since registration | n | Gender | n |
|-----|---|-------------------|---|-------------|---|--------------------------|---|--------|---|
|-----|---|-------------------|---|-------------|---|--------------------------|---|--------|---|

|              |     |            |     |              |     |              |     |        |     |
|--------------|-----|------------|-----|--------------|-----|--------------|-----|--------|-----|
| Under 25     | 35  | Full Time  | 325 | British      | 350 | <5 Years     | 98  | Male   | 113 |
| 26-30        | 76  | Part Time  | 72  | English      | 7   | 6 to 15      | 137 | Female | 323 |
| 31-40        | 127 | Retired    | 20  | Irish        | 11  | 16 to 25     | 60  | Total  | 436 |
| 41-50        | 84  | Student    | 16  | Scottish     | 4   | 26+          | 94  |        |     |
| 51-60        | 81  | Unemployed | 3   | Welsh        | 1   | Total        | 389 |        |     |
| 61-70        | 32  | Total      | 436 | N Irish      | 2   | Missing Data | 47  |        |     |
| Total        | 435 |            |     | EU           | 12  |              |     |        |     |
| Missing Data | 1   |            |     | Non EU       | 28  |              |     |        |     |
|              |     |            |     | Dual         | 7   |              |     |        |     |
|              |     |            |     | British      |     |              |     |        |     |
|              |     |            |     | Total        | 422 |              |     |        |     |
|              |     |            |     | Missing Data | 14  |              |     |        |     |

291

292

### 293 Principal Component Analysis

294 The principal component analysis used the correlation matrix obtained from the  
 295 application of the questionnaire to the 436 participants. Twenty-one iterations of  
 296 principal component analysis were performed. From the original set of items, only 40  
 297 items were chosen for the last iteration of the principal component analysis. The  
 298 Kaiser-Meyer-Olkin measure showed the level of sampling adequacy to be  
 299 acceptable (KMO = 0.896). The lowest measure of sample adequacy for an  
 300 individual item was 0.810 (*"I demonstrated I'm a good teacher"*). The Bartlett's  
 301 sphericity test indicated that the inter-item correlations were sufficient for proceeding  
 302 with the analysis. The lowest value for the items' communalities was 0.590 (*"If I  
 303 could live my life over, I would change almost nothing"*), which is above the aimed  
 304 threshold of 0.500. After *varimax* rotation, 10 factors were extracted taking into  
 305 account the findings of the scree plot and of a Monte Carlo parallel analysis. The 10  
 306 factors explained 71.80% of the variance. On the scree plot (see Figure 1) it is  
 307 possible to observe that the first five factors had the highest eigenvalues, while the  
 308 remaining five had similarly low eigenvalues.

309 A multidimensional item response theory model was created based on the results  
 310 of the best iteration of the principal component analysis. The resulting model  
 311 comprised the 40 items with the best psychometric properties and 10 latent variables  
 312 based on the factors obtained in the principal component analysis. The diagram with  
 313 the resulting model, containing the items selected for each one of the latent variables,  
 314 the loadings for each item and the correlation coefficients between the constructs can  
 315 be seen in Figure 2. This model was chosen as it was the best possible solution to  
 316 reconcile the need of creating a comprehensive, content-rich questionnaire while  
 317 obtaining satisfactory evidence of validity based on its internal structure. In terms of  
 318 goodness-of-fit, the model had significantly better fit than a unidimensional solution in  
 319 the chi-square test for difference testing ( $\chi^2 = 2889.749$ ,  $df = 45$ ,  $p < 0.001$ ). However,  
 320 the goodness-of-fit indices were not entirely perfect. While CFI, RMSEA and  $\chi^2/df$  are  
 321 within acceptable margins, TLI and WRMR are slightly out of the optimal margins  
 322 (above 0.950 for TLI and below 1,2 for WRMR) but still within the acceptable range.  
 323 The comparison of goodness-of-fit indices between the unidimensional solution and  
 324 the proposed model can be observed in Table 4.

325 **Table 4 – Comparison of selected goodness-of-fit indices between the**  
 326 **unidimensional model and the proposed model.**

| Models         | $\chi^2$ | df  | $\chi^2/df$ | RMSEA | CFI   | TLI   | WRMR  |
|----------------|----------|-----|-------------|-------|-------|-------|-------|
| Unidimensional | 8206.204 | 740 | 11.089      | 0.152 | 0.641 | 0.622 | 3.511 |
| Proposed model | 1736.922 | 695 | 2.499       | 0.059 | 0.950 | 0.944 | 1.271 |

328 **Table 5- Cronbach's alpha co-efficient for each construct**

| Construct               | Cronbach's alpha |
|-------------------------|------------------|
| Confidence              | 0.86             |
| Life satisfaction       | 0.86             |
| Behaviour Change        | 0.77             |
| Cultural awareness      | 0.72             |
| Difficult communication | 0.86             |
| Teaching skills         | 0.78             |
| Team Work               | 0.82             |
| Management skills       | 0.86             |



|                        |      |
|------------------------|------|
| Flexibility            | 0.83 |
| Adapting communication | 0.88 |

---

329

330 Reliability estimates were calculated using Cronbach's alpha coefficients but also  
 331 using estimates of individual precision calculated based on the individual estimates of  
 332 the standard errors of measurement. Figure 1 shows the precision curves for each  
 333 latent variable. While "Confidence", "Life Satisfaction" and "Team Work" had the  
 334 highest means for the individual precision estimates, "Adaptability" was the construct  
 335 that achieved the highest precision estimates for most of the theta spectrum. "Team  
 336 Work" had the lowest estimates for individual precision. Using the information  
 337 functions as indicators of precision, "Flexibility" achieved the highest values and "Team  
 338 work", the lowest ones. As expected, an inverse situation is observable on the curves  
 339 for the standard errors of measurement, with "Flexibility" showing the lowest  
 340 measurement errors and "Team Work" the highest ones. The precision, information  
 341 and standard error curves for the retrieved constructs under the MIRT analysis can be  
 342 observed in Figures 3, 4 and 5.

343 Table 5 shows the Cronbach's alpha coefficients for each one of the retrieved  
 344 constructs. Taking the Cronbach's alpha coefficients into account, the reliability  
 345 estimates are somewhat divergent from the MIRT-based precision estimates. Using  
 346 Cronbach's alpha, the most reliable factor was "Adapting Communication" and the  
 347 least reliable was "Cultural Awareness".

348 The PCA resulted in a 40 items that can be grouped into 10 constructs, the final list of  
 349 constructs and the items that belong on each can be seen in Table 6. Table 6 also  
 350 shows the loading estimates, the standard errors of the loading estimates, the ratios  
 351 between the estimate and the standard error and the two-tailed *p*-values for the  
 352 estimates. Table 6 shows the final selection of items with the dimension each one of  
 353 them belongs.

354 **<insert table 6>**

355 **<insert figures 1-5>**

356 **Discussion**



1  
2  
3 357 The study aimed to develop a questionnaire, using a large sample of healthcare  
4  
5 358 professionals with varying degrees of international experience, to establish and test  
6  
7 359 a set of latent traits and associated items that would measure the PPD outcomes of  
8  
9 360 international placements. We developed a 40-item questionnaire that can quantify 10  
10  
11 361 dimensions of PPD. We have named the dimensions Confidence, Life Satisfaction,  
12  
13 362 Cultural Awareness, Adapting Communication, Challenging Communication,  
14  
15 363 Teaching, Behaviour Change, Management, Teaching and Adaptability. Reliability  
16  
17 364 evidence is favourable to the latent trait structure, both when using a single  
18  
19 365 coefficient for the entire sample, and under the multidimensional item response  
20  
21 366 theory approach. The validity evidence based on the internal structure of the  
22  
23 367 questionnaire detailed in this study, combined with the content validity evidence  
24  
25 368 based on the selection of the initial pool of items [14] helps build a strong validity  
26  
27 369 argument in favour of the use of this questionnaire for the measurement of PDD-  
28  
29 370 related dimensions of international placements.

30  
31 371 Previous literature presents outcomes using broad categories such as  
32  
33 372 communication, leadership or cultural skills [2, 3] and the tool will facilitate  
34  
35 373 assessment of these. For example, the domain of 'communication', often mentioned  
36  
37 374 in previous literature, can be assessed in two domains 'difficult communication' and  
38  
39 375 'adapting communication', each containing 3 items. The reduction of a larger pool of  
40  
41 376 items which assess each domain, illustrates that not all elements which could be  
42  
43 377 included in each domain either should be or need to be in order to reliably assess  
44  
45 378 that domain.

46  
47 379 The participants in this study represented a broad range of healthcare professionals.  
48  
49 380 Although the professions of participants in the study were representative of the  
50  
51 381 NHSNW workforce [31], 'Medical and Dental' (Doctors) were over-represented and  
52  
53 382 'Support to clinical staff' (Healthcare Assistants or similar) underrepresented. Both  
54  
55 383 the sampling procedures and the fact that doctors are the group most likely to work  
56  
57 384 internationally . [32]. will have been likely to lead to this overrepresentation.  
58  
59 385 International experience is often imbedded into medical training courses, or is at  
60  
386 least not far removed from it [33]. The numbers are almost reversed in this sample,  
387 doctors constitute only 9.5% of the NHS workforce and account for 34% of the  
388 sample, whilst support staff make-up 28%, only 7% completed the pilot. Further  
389 analysis shows that all of the 30 support staff had no international experience, of

1  
2  
3 390 these only 26% were interested in international work. The sample of doctors was  
4  
5 391 polarised, only 4% had no interest in international work, but 90% had either  
6  
7 392 past/current experience or were about to travel internationally. Yet, Nursing and  
8  
9 393 Midwifery, Allied Health Professionals and Ambulance, mapped very closely onto the  
10  
11 394 NHSNW demographics. However, despite the sample not being fully representative,  
12  
13 395 it was necessary to ensure a sample that included 50% that had or were due to  
14  
15 396 undertake international experience. Females were also over-represented in the  
16  
17 397 sample. Nevertheless, the sample did contain a wide variety of staff and, as such,  
18  
19 398 could be used to assess the learning of a wide variety of staff.

20 399 The tool only includes items which group together and are therefore theoretically  
21  
22 400 assessing the same latent trait. This means that many items considered important  
23  
24 401 for international volunteering in the core outcome set were not included [14]. When  
25  
26 402 assessing latent traits, items which do not explain more variance in scores are  
27  
28 403 redundant. This tool, therefore, compliments rather than replaces other tools which  
29  
30 404 professionals to reflect on all components of their PPD [15].

### 31 405 **Conclusion**

32  
33 406 We have created an evidence-based 40-item psychometric tool for self-assessment  
34  
35 407 of learning on international placements. This tool could be used in research and  
36  
37 408 practice. In terms of research, it offers the opportunity to compare different types of  
38  
39 409 placement for their impact on PPD. It has been reported that certain variables may  
40  
41 410 affect the likelihood of PPD. These may be moderating variables; something that  
42  
43 411 influences strength of the relationship between international placements and  
44  
45 412 development of a latent trait [34]. For example, some argue that 'career stage' may  
46  
47 413 affect the likelihood of development of management skills internationally [7, 35].  
48  
49 414 There may also be mediating variables that explains the relationship between two  
50  
51 415 other variables [34]. For example, some argue it is lack of available resources that  
52  
53 416 affects an individual's development of 'adaptability' [36, 37]. This tool could be used  
54  
55 417 to measure PPD so that these relationships could be explored statistically.  
56  
57 418 Exploration of these relationships would provide evidence for employers, volunteer  
58  
59 419 placing organisations and volunteers themselves, to select and develop international  
60  
420 placements that are likely to lead to desired PPD outcomes. As such, the tool could  
421  
422 have a potentially great impact on international placement policy and practice and

1  
2  
3 422 the support or otherwise of the increasing globalization of the health workforce. In  
4 423 fact, the tool will be used in all Health Education England authorised volunteer  
5 424 placements over a twelve month period; which will generate large-scale data to  
6 425 hopefully evidence the benefits and potentially strengthen the tool.  
7  
8  
9

## 10 426 **Ethics**

11  
12  
13 427 Ethical approval was granted via the University of Salford (ref HSCR14/58) and the  
14 428 University of Manchester Research Ethics Committee (ref 14185).  
15  
16  
17 429

## 18 430 **List of Abbreviations**

19 431  
20  
21  
22 432 CFA- Confirmatory Factor Analysis  
23  
24 433 GHE- Global Health Exchange  
25  
26 434 HEE- Health Education England  
27  
28 435 HCA- Healthcare Assistant  
29  
30 436 HIC- High Income Country  
31  
32 437 LMIC- Low and Middle-income Country  
33  
34 438 MIRT- Multivariate Item Response Theory  
35  
36 439 NHS- National Health Service  
37  
38 440 NHSNW- National Health Service North West  
39  
40 441 PCA- Principle Component analysis  
41  
42 442 PPD- Personal and Professional Development  
43  
44 443 SWLS- Satisfaction with Life Scale  
45  
46  
47  
48  
49  
50  
51  
52  
53  
54  
55

## 56 **Declarations**

## 57 58 59 **Ethics approval and consent to participate** 60

1  
2  
3 Approval for the study was obtained from the Ethical Research Committee,  
4 University of Salford, and the University of Manchester Research Ethics Committee.  
5  
6

7 Participants gave informed consent.  
8  
9

### 10 **Consent for publication**

11  
12  
13  
14 Not applicable  
15  
16  
17

### 18 **Availability of data and material**

19  
20  
21 The datasets used and/or analysed during the current study are available from the  
22 corresponding author on reasonable request.  
23  
24  
25  
26

### 27 **Competing interests**

28  
29  
30 Professor Ged Byrne is the Director of Global Engagement for Health Education  
31 England. The other authors declare no competing interests.  
32  
33  
34  
35

### 36 **Funding**

37  
38  
39 This work was supported by a project development grant from Health Education  
40 England (HEE), through the Global Health Exchange (GHE). Grant ref. NURA54  
41  
42  
43  
44

### 45 **Author contributions**

46  
47  
48  
49 NT participated in the design of the study, conducted the pilot and drafted the  
50 majority of the manuscript. LBD conceived the design of the study, analysed data  
51 and contributed significantly to drafting the manuscript. CC provided oversight to the  
52 study design, conducted the PCA and statistical analysis and drafted the manuscript,  
53  
54  
55  
56  
57  
58  
59 GB provided oversight of study design, helped recruit participants and drafted the  
60

1  
2  
3 manuscript. All authors participated in the coordination of the research and read and  
4  
5 approved the final manuscript.  
6  
7

## 8 9 **Acknowledgements**

10  
11 We would like to thank Anya Ahmed, Louise Ackers, Natalie Tate, Eileen  
12  
13 Cunningham, Hassan Osman and James Ackers-Johnson for being involved in the  
14  
15 wider MOVE project.  
16  
17

18  
19 We would like to thank all of the stakeholders and participant groups involved for  
20  
21 their significant contribution of time and effort.  
22  
23

24  
25 The full title of the study from which this analysis was derived was: *Measuring the*  
26  
27 *outcomes of volunteering for education (MOVE)*. The study was funded by *Health*  
28  
29 *Education England (Global Health Exchange)*. The research team were independent  
30  
31 from the funding agency. The views expressed in this publication are those of the  
32  
33 authors and not necessarily those of *Health Education England* or the *Department of*  
34  
35 *Health*  
36  
37

38  
39 444

## 40 41 42 **References**

- 43  
44  
45 446 1. Crisp N. Mutual learning and reverse innovation--where next? *Global Health*.  
46  
47 447 2014;10:14. doi:10.1186/1744-8603-10-14.  
48  
49 448 2. Jones FA, Knights DP, Sinclair VF, Baraitser P. Do health partnerships with  
50  
51 449 organisations in lower income countries benefit the UK partner? *Global Health*.  
52  
53 450 2013;9:38. doi:10.1186/1744-8603-9-38.  
54  
55 451 3. Abell C, Taylor S. The NHS benefits from doctors working abroad. *BMJ*.  
56  
57 452 1995;311:133–4. doi:10.1136/bmj.311.6997.133.  
58  
59 453 4. Kiernan P, O'Dempsey T, Kwalombota K, Elliott L, Cowan L. Evaluation of effect  
60

- 1  
2  
3 454 on skills of GP trainees taking time out of programme (OOP) in developing countries.  
4  
5 455 Educ Prim Care. 2014;25:78–83. <http://www.ncbi.nlm.nih.gov/pubmed/24593970>.  
6  
7 456 Accessed 22 Jul 2015.  
8  
9 457 5. Norton D, Marks-Maran D. Developing cultural sensitivity and awareness in  
10  
11 458 nursing overseas. Nurs Stand. 2014;28:39–43. doi:10.7748/ns.28.44.39.e8417.  
12  
13 459 6. Standage R, Randall D. The benefits for children’s nurses of overseas  
14  
15 460 placements: where is the evidence? Issues Compr Pediatr Nurs. 2014;37:87–102.  
16  
17 461 doi:10.3109/01460862.2014.880531.  
18  
19 462 7. Hockey P, Tobin A, Kemp J, Kerrigan J, Kitsell F, Green P, et al. Global health  
20  
21 463 partnerships: leadership development for a purpose. Leadership in Health Services.  
22  
23 464 2009;22:306–16.  
24  
25 465 8. Lumb A, Murdoch-Eaton D. Electives in undergraduate medical education: AMEE  
26  
27 466 Guide No. 88. Med Teach. 2014;36:557–72. doi:10.3109/0142159X.2014.907887.  
28  
29 467 9. Button L, Green B, Tengnah C, Johansson I, Baker C. The impact of international  
30  
31 468 placements on nurses’ personal and professional lives: literature review. J Adv Nurs.  
32  
33 469 2005;50:315–24. doi:10.1111/j.1365-2648.2005.03395.x.  
34  
35 470 10. Ackers HL, Ackers-Johnson J, Chatwin J, Tyler N. Healthcare, Frugal Innovation,  
36  
37 471 and Professional Voluntarism. Cham: Springer International Publishing; 2017.  
38  
39 472 doi:10.1007/978-3-319-48366-5.  
40  
41 473 11. Tropical Health Education Trust. In our mutual interest. 2017.  
42  
43 474 <https://www.thet.org/wp-content/uploads/2017/08/In-Our-Mutual-Interest.pdf>.  
44  
45 475 12. Crisp N. Turning the world upside down : the search for global health in the  
46  
47 476 twenty-first century. Royal Society of Medicine Press; 2010.  
48  
49 477 13. Wright J, Walley J, Philip A, Petros H, Ford H. Research into practice: 10 years  
50  
51 478 of international public health partnership between the UK and Swaziland. J Public  
52  
53 479 Health (Oxf). 2010;32:277–82.  
54  
55 480 14. Tyler N, Chatwin J, Byrne G, Hart J, Byrne-Davis LMT. The benefits of  
56  
57 481 International volunteering in a low-resource setting: Development of a core outcome  
58  
59 482 set. In press.

- 1  
2  
3 483 15. Longstaff B. Toolkit for the collection of evidence of knowledge and skills gained  
4 484 through participation in an international health project.  
5  
6  
7 485 16. Smith C, Pettigrew LM, Seo H-N, Dorward J. Combining general practice with  
8 486 international work: online survey of experiences of UK GPs. *JRSM Short Reports*.  
9 487 2012;3:46–46.  
10  
11  
12  
13 488 17. Lough BJ, McBride AM, Sherraden MS. Perceived effects of international  
14 489 volunteering: Reports from alumni. 2009.  
15  
16  
17  
18 490 18. Wu M, Ping H, Jen T. Educational Measurement for Applied Researchers. 2017.  
19 491 [https://books.google.co.uk/books?id=EOHTDQAAQBAJ&pg=PA22&lpg=PA22&dq=](https://books.google.co.uk/books?id=EOHTDQAAQBAJ&pg=PA22&lpg=PA22&dq=tap+into+latent+traits&source=bl&ots=KNzd0XfZxn&sig=754d3_DYxsS8Hh2DBt_ny9h8Uf0&hl=en&sa=X&ved=0ahUKEwj-8rbsmPLTAhVIJ8AKHcFEakoQ6AEILDAB#v=onepage&q=tap+into+latent+traits&f=false)  
20 492 [ap+into+latent+traits&source=bl&ots=KNzd0XfZxn&sig=754d3\\_DYxsS8Hh2DBt\\_ny9](https://books.google.co.uk/books?id=EOHTDQAAQBAJ&pg=PA22&lpg=PA22&dq=tap+into+latent+traits&source=bl&ots=KNzd0XfZxn&sig=754d3_DYxsS8Hh2DBt_ny9h8Uf0&hl=en&sa=X&ved=0ahUKEwj-8rbsmPLTAhVIJ8AKHcFEakoQ6AEILDAB#v=onepage&q=tap+into+latent+traits&f=false)  
21 493 [h8Uf0&hl=en&sa=X&ved=0ahUKEwj-](https://books.google.co.uk/books?id=EOHTDQAAQBAJ&pg=PA22&lpg=PA22&dq=tap+into+latent+traits&source=bl&ots=KNzd0XfZxn&sig=754d3_DYxsS8Hh2DBt_ny9h8Uf0&hl=en&sa=X&ved=0ahUKEwj-8rbsmPLTAhVIJ8AKHcFEakoQ6AEILDAB#v=onepage&q=tap+into+latent+traits&f=false)  
22 494 [8rbsmPLTAhVIJ8AKHcFEakoQ6AEILDAB#v=onepage&q=tap into latent](https://books.google.co.uk/books?id=EOHTDQAAQBAJ&pg=PA22&lpg=PA22&dq=tap+into+latent+traits&source=bl&ots=KNzd0XfZxn&sig=754d3_DYxsS8Hh2DBt_ny9h8Uf0&hl=en&sa=X&ved=0ahUKEwj-8rbsmPLTAhVIJ8AKHcFEakoQ6AEILDAB#v=onepage&q=tap+into+latent+traits&f=false)  
23 495 [traits&f=false](https://books.google.co.uk/books?id=EOHTDQAAQBAJ&pg=PA22&lpg=PA22&dq=tap+into+latent+traits&source=bl&ots=KNzd0XfZxn&sig=754d3_DYxsS8Hh2DBt_ny9h8Uf0&hl=en&sa=X&ved=0ahUKEwj-8rbsmPLTAhVIJ8AKHcFEakoQ6AEILDAB#v=onepage&q=tap+into+latent+traits&f=false). Accessed 15 May 2017.  
24  
25  
26  
27  
28  
29 496 19. Hambleton RK, Cook LL. Latent Trait Models and Their use in the Analysis of  
30 497 Educational Test Data. *J Educ Meas*. 1977;14:75–96. doi:10.1111/j.1745-  
31 498 3984.1977.tb00030.x.  
32  
33  
34  
35 499 20. Evans DB, Murray CJL. Health systems performance assessment : debates,  
36 500 methods and empiricism. World Health Organization; 2003.  
37  
38 501 [https://books.google.co.uk/books?id=Ut\\_xcxWHobYC&pg=PA739&lpg=PA739&dq=t](https://books.google.co.uk/books?id=Ut_xcxWHobYC&pg=PA739&lpg=PA739&dq=tap+into+latent+traits&source=bl&ots=jh4GceWRQt&sig=MwkVD0ZpHWATucLYNWJU9u3snMQ&hl=en&sa=X&ved=0ahUKEwj-8rbsmPLTAhVIJ8AKHcFEakoQ6AEIMTAC#v=onepage&q=tap+into+latent+traits&f=false)  
39 502 [ap+into+latent+traits&source=bl&ots=jh4GceWRQt&sig=MwkVD0ZpHWATucLYNW](https://books.google.co.uk/books?id=Ut_xcxWHobYC&pg=PA739&lpg=PA739&dq=tap+into+latent+traits&source=bl&ots=jh4GceWRQt&sig=MwkVD0ZpHWATucLYNWJU9u3snMQ&hl=en&sa=X&ved=0ahUKEwj-8rbsmPLTAhVIJ8AKHcFEakoQ6AEIMTAC#v=onepage&q=tap+into+latent+traits&f=false)  
40 503 [JU9u3snMQ&hl=en&sa=X&ved=0ahUKEwj-](https://books.google.co.uk/books?id=Ut_xcxWHobYC&pg=PA739&lpg=PA739&dq=tap+into+latent+traits&source=bl&ots=jh4GceWRQt&sig=MwkVD0ZpHWATucLYNWJU9u3snMQ&hl=en&sa=X&ved=0ahUKEwj-8rbsmPLTAhVIJ8AKHcFEakoQ6AEIMTAC#v=onepage&q=tap+into+latent+traits&f=false)  
41 504 [8rbsmPLTAhVIJ8AKHcFEakoQ6AEIMTAC#v=onepage&q=tap into latent](https://books.google.co.uk/books?id=Ut_xcxWHobYC&pg=PA739&lpg=PA739&dq=tap+into+latent+traits&source=bl&ots=jh4GceWRQt&sig=MwkVD0ZpHWATucLYNWJU9u3snMQ&hl=en&sa=X&ved=0ahUKEwj-8rbsmPLTAhVIJ8AKHcFEakoQ6AEIMTAC#v=onepage&q=tap+into+latent+traits&f=false)  
42 505 [traits&f=false](https://books.google.co.uk/books?id=Ut_xcxWHobYC&pg=PA739&lpg=PA739&dq=tap+into+latent+traits&source=bl&ots=jh4GceWRQt&sig=MwkVD0ZpHWATucLYNWJU9u3snMQ&hl=en&sa=X&ved=0ahUKEwj-8rbsmPLTAhVIJ8AKHcFEakoQ6AEIMTAC#v=onepage&q=tap+into+latent+traits&f=false). Accessed 15 May 2017.  
43  
44  
45  
46  
47  
48 506 21. Charter RA. Sample Size Requirements for Precise Estimates of Reliability,  
49 507 Generalizability, and Validity Coefficients. *J Clin Exp Neuropsychol*  
50 508 (Neuropsychology, Dev Cogn Sect A). 1999.  
51  
52  
53  
54 509 22. My eForms - eForms. <https://eforms.mhs.man.ac.uk/>. Accessed 19 May 2017.  
55  
56  
57 510 23. Ericsson KA, Simon HA. How to study thinking in everyday life: Contrasting think-  
58 511 aloud protocols with descriptions and explanations of thinking. *Mind, Cult Act*. 1998.



- 1  
2  
3 512 24. Caspar RA, Lessler JT, Willis GB. Reducing survey error through research on  
4 513 the cognitive and decision processes in surveys. Short course Present 1999 Meet  
5 514 Am Stat Assoc. 1999.
- 6  
7  
8  
9 515 25. Diener E, Emmons RA, Larsen RJ, Griffin S. The Satisfaction With Life Scale. J  
10 516 Pers Assess. 1985;49:71–5. doi:10.1207/s15327752jpa4901\_13.
- 11  
12  
13 517 26. Osteen P. An Introduction to Using Multidimensional Item Response Theory to  
14 518 Assess Latent Factor Structures. J Soc Social Work Res. 2010.
- 15  
16  
17 519 27. Liang X, Yang Y. An evaluation of WLSMV and Bayesian methods for  
18 520 confirmatory factor analysis with categorical indicators. Int J Quant Res Educ. 2014.
- 19  
20  
21 521 28. IBM Corp. IBM SPSS Statistics for Macintosh, Version 24.0. 2016. 2016.
- 22  
23  
24 522 29. Muthén L, Muthén B. Mplus user's guide (8th ed.). 2017.
- 25  
26  
27 523 30. Electronic Staff Record Programme Data Warehouse. North West Staff in post.  
28 524 2013.
- 29  
30  
31 525 31. The NHS Electronic Staff Record. . [http://www.electronicstaffrecord.nhs.uk/esr-](http://www.electronicstaffrecord.nhs.uk/esr-operational/functionality/data-warehouse/)  
32 526 [operational/functionality/data-warehouse/](http://www.electronicstaffrecord.nhs.uk/esr-operational/functionality/data-warehouse/). Accessed 16 May 2017.
- 33  
34  
35 527 32. Chatwin J, Ackers L. Volunteering and overseas placements in the NHS: a  
36 528 survey of current activity. BMJ Open. 2016;6.  
37 529 <http://bmjopen.bmj.com/content/6/10/e012160.abstract>.
- 38  
39  
40  
41 530 33. Jeffrey J, Dumont RA, Kim GY, Kuo T. Effects of international health electives on  
42 531 medical student learning and career choice: results of a systematic literature review.  
43 532 Fam Med. 2011;43:21–8.
- 44  
45  
46  
47 533 34. Baron R, Kenny D. The moderator–mediator variable distinction in social  
48 534 psychological research: Conceptual, strategic, and statistical considerations. J  
49 535 Personal Soc. 1986. <http://psycnet.apa.org/psycinfo/1987-13085-001>. Accessed 16  
50 536 May 2017.
- 51  
52  
53  
54  
55 537 35. Banatvala N, Doyal L. Knowing when to say “no” on the student elective.  
56 538 Students going on electives abroad need clinical guidelines. BMJ. 1998;316:1404–5.  
57 539 <http://www.pubmedcentral.nih.gov/articlerender.fcgi?artid=1113113&tool=pmcentrez>  
58  
59  
60



540 &rendertype=abstract. Accessed 27 Apr 2016.

541 36. Connolly AM, Stirling S. Working in a developing country. Which is good  
542 experience. BMJ. 1995;311:946.

543 <http://www.pubmedcentral.nih.gov/articlerender.fcgi?artid=2550937&tool=pmcentrez>  
544 &rendertype=abstract. Accessed 27 Apr 2016.

545 37. Parry E, Parry V. Training for health care in developing countries: the work of the  
546 Tropical Health and Education Trust. Med Educ. 1998;32:630–5.

547 <http://www.ncbi.nlm.nih.gov/pubmed/10211253>. Accessed 20 Jan 2016.

548

549 **Table 6: The final selection of items with the dimension each one of them**  
550 **belongs, the loading estimates, the standard errors of the loading estimates,**  
551 **the ratios between the estimate and the standard error and the two-tailed *p*-**  
552 **values for the estimates.**

553

| Constructs / Items                                                       | Estimate | S.E.  | P-Value (two-tailed) |
|--------------------------------------------------------------------------|----------|-------|----------------------|
| <b>CONFIDENCE</b>                                                        |          |       |                      |
| I am confident in my ability to manage myself in a clinical environment. | 0.727    | 0.030 | 0.000                |
| I am confident in my abilities to work independently when necessary.     | 0.719    | 0.032 | 0.000                |
| I am confident in my ability to deal with the unexpected.                | 0.743    | 0.025 | 0.000                |
| I am confident in my ability to be adaptable and innovative as a leader. | 0.733    | 0.024 | 0.000                |

| Constructs / Items                                                        | Estimate | S.E.  | P-Value (two-tailed) |
|---------------------------------------------------------------------------|----------|-------|----------------------|
| I am confident in my ability to adapt and be flexible clinically.         | 0.823    | 0.021 | 0.000                |
| I am confident in my ability to adapt and be flexible in general.         | 0.798    | 0.021 | 0.000                |
| I am confident in my ability to find solutions despite limited resources. | 0.770    | 0.022 | 0.000                |
| I am confident in my ability to apply clinical skills to another context. | 0.721    | 0.026 | 0.000                |
| I am confident in my work.                                                | 0.724    | 0.025 | 0.000                |
| <b>LIFE SATISFACTION</b>                                                  |          |       |                      |
| In most ways my life is close to my ideal.                                | 0.834    | 0.02  | 0.000                |
| The conditions of my life are excellent.                                  | 0.783    | 0.02  | 0.000                |
| I am satisfied with my life.                                              | 0.893    | 0.017 | 0.000                |
| So far I have gotten the important things I want in life.                 | 0.776    | 0.024 | 0.000                |
| If I could live my life over. I would change almost nothing.              | 0.667    | 0.029 | 0.000                |
| Taking everything into consideration. I am satisfied with my job.         | 0.717    | 0.038 | 0.000                |
| <b>CULTURAL</b>                                                           |          |       |                      |
| I demonstrated a good awareness about how culture influences health.      | 0.761    | 0.036 | 0.000                |
| I frequently demonstrated cultural sensitivity.                           | 0.881    | 0.031 | 0.000                |
| I was constantly conscious of culture when working with patients.         | 0.779    | 0.033 | 0.000                |
| <b>ADAPTING COMMUNICATION</b>                                             |          |       |                      |

| Constructs / Items                                                                                                       | Estimate | S.E.  | P-Value<br>(two-tailed) |
|--------------------------------------------------------------------------------------------------------------------------|----------|-------|-------------------------|
| I changed the way I speak so that somebody can understand me (e.g. purposely spoke slower and clearer).                  | 0.899    | 0.024 | 0.000                   |
| I changed the way I communicate to make it more contextually appropriate (e.g.. to make it more culturally appropriate). | 0.916    | 0.025 | 0.000                   |
| I frequently relied on my non-verbal communication (e.g. hand gestures).                                                 | 0.751    | 0.032 | 0.000                   |
| <b>TEACHING</b>                                                                                                          |          |       |                         |
| I demonstrated I'm a good teacher.                                                                                       | 0.813    | 0.024 | 0.000                   |
| I adapted the way I teach to make it better for the learner.                                                             | 0.807    | 0.023 | 0.000                   |
| I am confident in my ability to teach others.                                                                            | 0.883    | 0.031 | 0.000                   |
| <b>DIFFICULT COMMUNICATION</b>                                                                                           |          |       |                         |
| I demonstrated that I am skilled in challenging conversations. even in high pressure situations.                         | 0.842    | 0.025 | 0.000                   |
| I demonstrated that I am able to manage difficult people effectively.                                                    | 0.862    | 0.021 | 0.000                   |
| I frequently dealt with difficult people.                                                                                | 0.774    | 0.027 | 0.000                   |
| <b>BEHAVIOUR CHANGE</b>                                                                                                  |          |       |                         |
| I am able to empower patients to help themselves.                                                                        | 0.807    | 0.026 | 0.000                   |
| I am able to empower colleagues to help themselves.                                                                      | 0.794    | 0.025 | 0.000                   |
| In my work I have demonstrated skills in changing colleagues' behaviour.                                                 | 0.761    | 0.027 | 0.000                   |
| In my work I have demonstrated skills in encouraging and supporting patients to change behaviour.                        | 0.778    | 0.027 | 0.000                   |

| Constructs / Items                                                                                    | Estimate | S.E.  | P-Value (two-tailed) |
|-------------------------------------------------------------------------------------------------------|----------|-------|----------------------|
| <b>MANAGEMENT</b>                                                                                     |          |       |                      |
| I allocated tasks.                                                                                    | 0.848    | 0.021 | 0.000                |
| I co-ordinated colleagues.                                                                            | 0.868    | 0.02  | 0.000                |
| I demonstrated I am able to plan and organise.                                                        | 0.907    | 0.024 | 0.000                |
| <b>TEAM WORK</b>                                                                                      |          |       |                      |
| I was frequently proactive at work (e.g. used my initiative. got on with things. thought on my feet). | 0.778    | 0.027 | 0.000                |
| I demonstrated that I am able to cope in work (e.g. able to deal with stress).                        | 0.763    | 0.028 | 0.000                |
| I demonstrated that I am particularly good at working as part of team.                                | 0.765    | 0.026 | 0.000                |
| <b>FLEXIBILITY</b>                                                                                    |          |       |                      |
| I demonstrated I'm good at dealing with the unexpected.                                               | 0.857    | 0.037 | 0.000                |
| I frequently had to find solutions despite limited resources.                                         | 0.912    | 0.017 | 0.000                |
| I demonstrated I am able to find solutions despite limited resources.                                 | 0.937    | 0.017 | 0.000                |

554

## 555 List of Figures

556 Figure 1: Scree Plot

557 Figure 2: Latent variables and loadings

558 Figure 3: Estimates for mean individual precision of the latent variable scores.

559 Figure 4: Information functions for the latent variables.

560 Figure 5: Estimates for individual standard errors of measurement of the latent  
561 variable scores.

1  
2  
3 562  
4  
5 563  
6  
7 564 **List of Tables**  
8  
9 565 Table 1: Participants: Anticipated and Actual Numbers  
10  
11 566 Table 2: Professions of participants  
12  
13 567 Table 3: Participant Demographic Information: age, employment status, nationality,  
14  
15 568 gender and career stage (years since registration)  
16  
17 569 Table 4: Comparison of selected goodness-of-fit indices between the unidimensional  
18  
19 570 model and the proposed model.  
20  
21 571 Table 5: Cronbach's alpha co-efficient for each construct  
22  
23 572 Table 6: The final selection of items with the dimension each one of them belongs, the  
24  
25 573 loading estimates, the standard errors of the loading estimates, the ratios between the  
26  
27 574 estimate and the standard error and the two-tailed  $p$ -values for the estimates.  
28  
29  
30  
31 575  
32  
33  
34  
35  
36  
37  
38  
39  
40  
41  
42  
43  
44  
45  
46  
47  
48  
49  
50  
51  
52  
53  
54  
55  
56  
57  
58  
59  
60

1  
2  
3  
4  
5  
6  
7  
8  
9  
10  
11  
12  
13  
14  
15  
16  
17  
18  
19  
20  
21  
22  
23  
24  
25  
26  
27  
28  
29  
30  
31  
32  
33  
34  
35  
36  
37  
38  
39  
40  
41  
42  
43  
44  
45  
46  
47  
48  
49  
50  
51  
52  
53  
54  
55  
56  
57  
58  
59  
60

Scree Plot

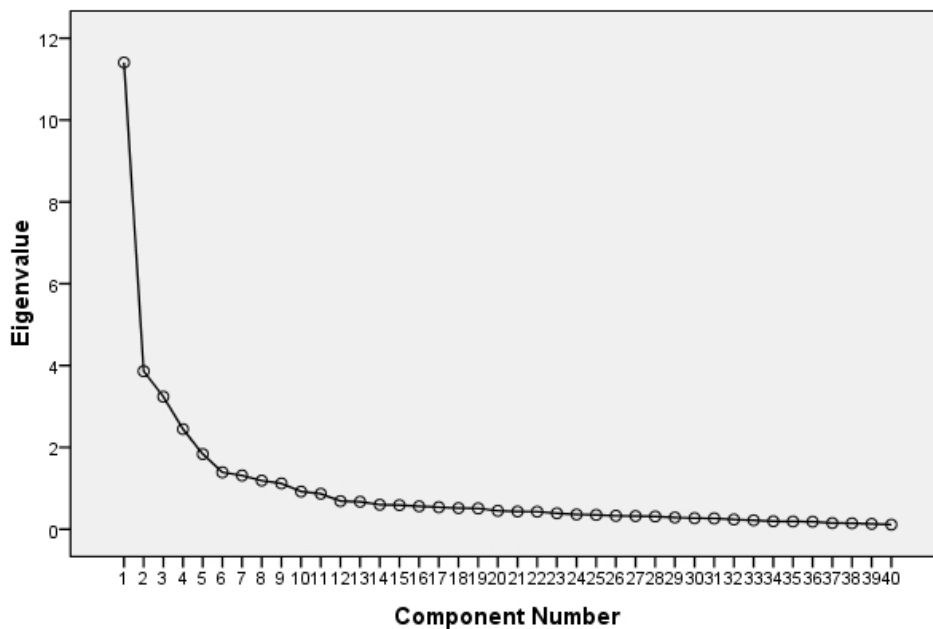

Scree Plot

1  
2  
3  
4  
5  
6  
7  
8  
9  
10  
11  
12  
13  
14  
15  
16  
17  
18  
19  
20  
21  
22  
23  
24  
25  
26  
27  
28  
29  
30  
31  
32  
33  
34  
35  
36  
37  
38  
39  
40  
41  
42  
43  
44  
45  
46  
47  
48  
49  
50  
51  
52  
53  
54  
55  
56  
57  
58  
59  
60

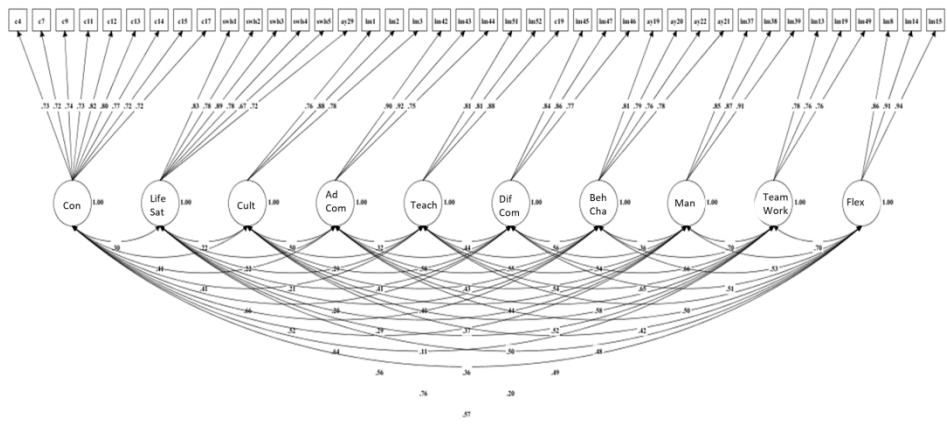

Latent variables and loadings

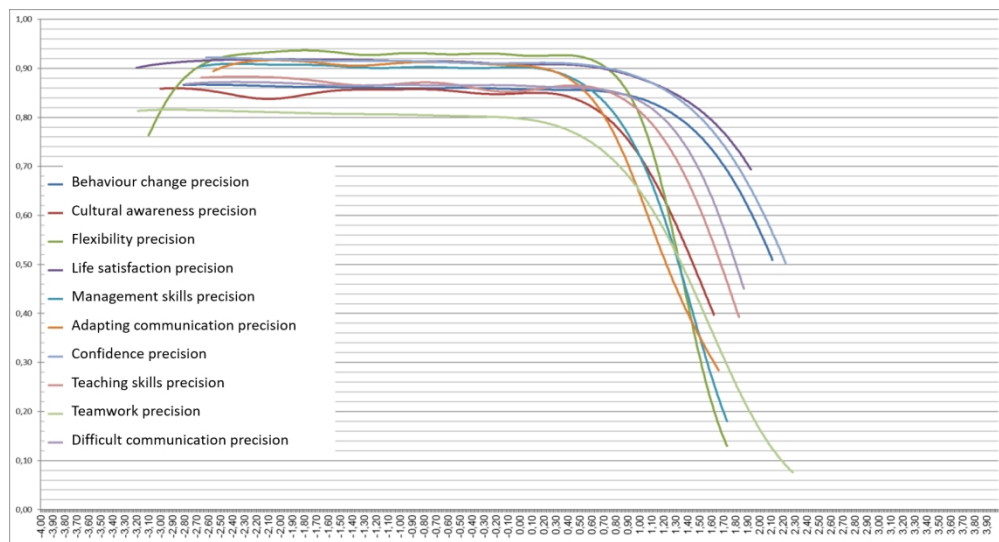

Estimates for mean individual precision of the latent variable scores



1  
2  
3  
4  
5  
6  
7  
8  
9  
10  
11  
12  
13  
14  
15  
16  
17  
18  
19  
20  
21  
22  
23  
24  
25  
26  
27  
28  
29  
30  
31  
32  
33  
34  
35  
36  
37  
38  
39  
40  
41  
42  
43  
44  
45  
46  
47  
48  
49  
50  
51  
52  
53  
54  
55  
56  
57  
58  
59  
60

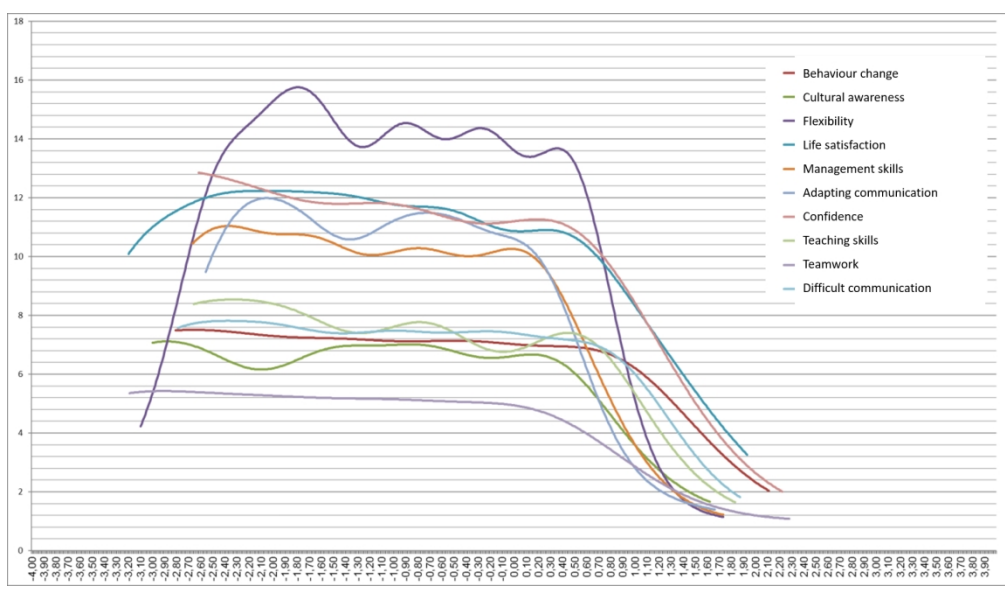

Information functions for the latent variables

1  
2  
3  
4  
5  
6  
7  
8  
9  
10  
11  
12  
13  
14  
15  
16  
17  
18  
19  
20  
21  
22  
23  
24  
25  
26  
27  
28  
29  
30  
31  
32  
33  
34  
35  
36  
37  
38  
39  
40  
41  
42  
43  
44  
45  
46  
47  
48  
49  
50  
51  
52  
53  
54  
55  
56  
57  
58  
59  
60

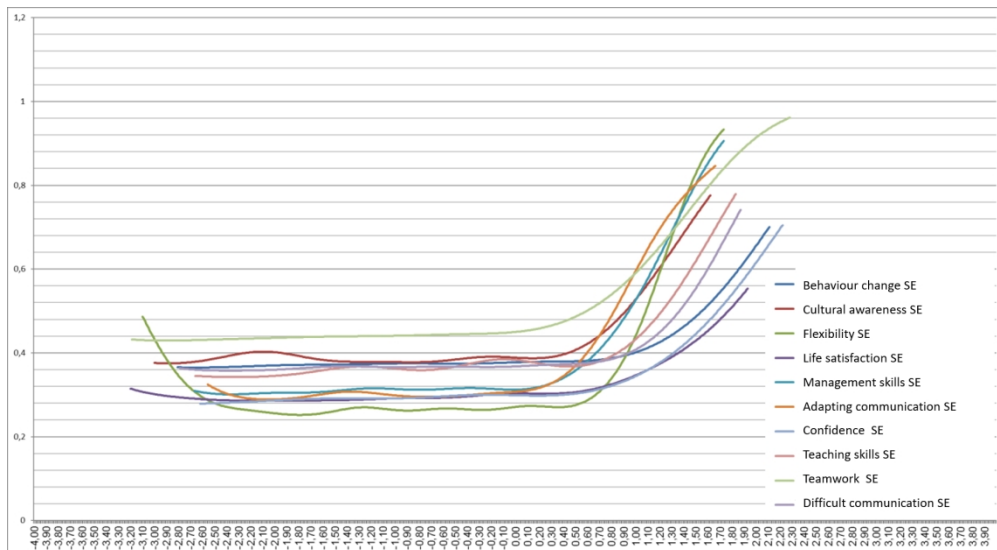

Estimates for individual standard errors of measurement of the latent variable scores

# BMJ Open

## Measuring the Outcomes of Volunteering for Education: Development and pilot of a tool to assess health professionals' personal and professional development from international volunteering

|                                 |                                                                                                                                                                                                                                                                 |
|---------------------------------|-----------------------------------------------------------------------------------------------------------------------------------------------------------------------------------------------------------------------------------------------------------------|
| Journal:                        | <i>BMJ Open</i>                                                                                                                                                                                                                                                 |
| Manuscript ID                   | bmjopen-2018-028206.R1                                                                                                                                                                                                                                          |
| Article Type:                   | Research                                                                                                                                                                                                                                                        |
| Date Submitted by the Author:   | 14-May-2019                                                                                                                                                                                                                                                     |
| Complete List of Authors:       | Tyler, Natasha; University of Nottingham Business School<br>Collares, Carlos; Maastricht University , School of Health Professions Education<br>Byrne, Ged; Health Education England<br>Byrne-Davis, Lucie; University of Manchester, Manchester Medical School |
| <b>Primary Subject Heading</b>: | Global health                                                                                                                                                                                                                                                   |
| Secondary Subject Heading:      | Health services research, Health policy, Medical education and training                                                                                                                                                                                         |
| Keywords:                       | • Personal and Professional Development, • International Placements, • Volunteering, • Health Professionals, • Low and Middle Income Countries, • Psychometric Tool                                                                                             |
|                                 |                                                                                                                                                                                                                                                                 |

SCHOLARONE™  
Manuscripts

1  
2  
3 **Measuring the Outcomes of Volunteering for Education: Development and**  
4  **pilot of a tool to assess health professionals' personal and professional**  
5  **development from international volunteering**  
6  
7  
8  
9

10 Tyler, N, University of Nottingham, natasha.tyler@nottingham.ac.uk (Corresponding  
11 Author)  
12

13  
14 Collares, CF, Maastricht University, c.collares@maastrichtuniversity.nl  
15

16  
17 Byrne, GJ, Health Education England, ged.byrne@hee.nhs.uk  
18

19  
20 Byrne-Davis, LMT, University of Manchester, UK lucie.byrne-  
21 davis@manchester.ac.uk  
22

23  
24  
25  
26  
27 Word Count: 4000  
28  
29  
30  
31  
32  
33  
34  
35  
36  
37  
38  
39  
40  
41  
42  
43  
44  
45  
46  
47  
48  
49  
50  
51  
52  
53  
54  
55  
56  
57  
58  
59  
60

## **Abstract**

**Objective:** The development and pilot of a self-report questionnaire, to assess personal and professional development of health professionals gained through experiences in low and middle-income countries.

**Design** The instrument was developed from a core set of the outcomes of international placements for UK health professionals. Principle component analysis and multidimensional item response theory were conducted using results of a cross-sectional pilot study to highlight items with the best psychometric properties.

**Setting:** Questionnaires were completed both online and in multiple UK health professional events face-to-face.

**Participants:** 436 Healthcare professional participants from the UK (with and without international experience) completed a 110-item questionnaire in which they assessed their knowledge, skills and attitudes.

**Measures:** The 110 item questionnaire included self-report questions on a 7-point Likert scale of agreement, developed from the core outcome set, including items on satisfaction, clinical skills, communication and other important health professional knowledge, skills, attitudes and behaviours. Item reduction led to development of the 40-item Measuring the Outcomes of Volunteering for Education- Tool (MOVE-iT). Internal consistency was evaluated by the Cronbach's  $\alpha$  coefficient. Exploratory analysis investigated the structure of the data using Principal Component Analysis and Multivariate Item Response Theory.

**Results:** Exploratory Analysis found 10 principle components that explained 71.80% of the variance. Components were labelled 'Attitude to work, Adaptability, Adapting Communication, Cultural Sensitivity, Difficult Communication, Confidence, Teaching, Management, Behaviour Change and Life Satisfaction'. Internal consistency was acceptable for the identified components ( $\alpha$  between 0.72 to 0.86).

**Conclusions:** A 40-item self-report questionnaire developed from a core outcome set for personal and professional development from international placements was developed, with evidence of good reliability and validity. This questionnaire will increase understanding of impact of international placements, facilitating

1  
2  
3 comparisons of different types of experience. This will aid decision making about  
4 whether UK health professionals should be encouraged to volunteer internationally  
5 and in what capacity.  
6  
7  
8  
9  
10

## 11 **Key Words**

- 14 • Personal and Professional Development
- 15 • International Placements
- 16 • Volunteering
- 17 • Health Professionals
- 18 • Low and Middle Income Countries
- 19 • Principle Component Analysis
- 20 • Psychometric Tool
- 21 • Learning Assessment
- 22 • Self-Assessment

## 23 **Article Summary**

### 24 **Strengths and Limitations of this Study**

- 25 • The Measuring the Outcomes of Volunteering for Education- Tool (MOVE-  
26 iT) was developed based on evidence from peer-reviewed literature and  
27 expert opinion
- 28 • The underlying structures of the instrument were explored using a large  
29 data set of 436 multi-disciplinary health professionals
- 30 • The psychometric analyses demonstrate good internal consistency  
31 reliability
- 32 • The MOVE-iT tool can be used to assess learning of health professionals  
33 volunteering in low and middle-income countries

## 34 **Background**

35  
36 Globalisation of the health workforce has inevitably led to large numbers of qualified  
37 healthcare professionals choosing to temporarily (ranging between 1 day to 2 years) work  
38 overseas in some capacity, with many choosing low and middle income countries (LMICs)  
39 (1). In this paper we describe international placements in any LMIC (as defined by the  
40  
41  
42  
43  
44  
45  
46  
47  
48  
49  
50  
51  
52  
53  
54  
55  
56  
57  
58  
59  
60

1  
2  
3 OECD) in which the healthcare professional receives little or no remuneration; this is often  
4 referred to as volunteering. Such placements can take numerous forms, for example a  
5 dentist delivering a service on a hospital train in India (2), British healthcare professionals  
6 of many cadres working together in health partnerships with a hospital in Tanzania (3), or  
7 healthcare scientists working in labs in sub-Saharan Africa (4).  
8  
9

10  
11  
12  
13 International health volunteering has been reported as resulting in personal and  
14 professional development (PPD), for example a change in attitudes on a personal level, or  
15 developing new/broadening existing professional skills, see our previous work for a full list  
16 of all reported PPD (5). Benefits have been reported for both the individual's practice and  
17 also patient outcomes upon return (6). Many professionals report PPD outcomes as a  
18 result of the new experience and particularly that working in an LMIC encourages  
19 healthcare professionals to learn new skills in an effort to adequately adapt, for example  
20 using new clinical techniques specific to the LMIC, or dealing with a new cultural  
21 phenomenon (7–9). Professionals report that LMICs provide staff with an opportunity to  
22 practice skills that they would not develop in a domestic work setting, as such giving them  
23 increased confidence in their work (8,10). In some academic papers professionals report  
24 perceived/expected exposure to higher numbers of clinical cases and often clinical cases  
25 that are more challenging than those seen in high income countries (HICs) as well as  
26 opportunities to lead, make decisions and work within new cultural and social norms  
27 (6,9,11,12). Many staff report a change in core attitudes or beliefs: a greater appreciation  
28 of caring, an acceptance of cultural differences or a changed/new/broader perspective  
29 (8,9,13,14). As a result, in the UK, some organisations have proposed that enabling and  
30 encouraging staff to work in LMICs may have great benefits to the NHS (6,7,15) and have  
31 expressed a desire to assess PPD outcomes (16,17) to provide quantitative evidence of  
32 benefit.  
33  
34  
35  
36  
37  
38  
39  
40  
41  
42  
43  
44  
45  
46  
47  
48  
49

50 Despite these reported benefits, volunteering is sometimes perceived as a loss to the high  
51 income country, for example our research found that within the UK National Health  
52 Service (NHS), some management perceived volunteering as a loss of staff within a  
53 service that is already under pressure (15). As such, some employers are reluctant to  
54 release staff for international placements (15).  
55  
56  
57  
58  
59  
60

Qualitative research into the benefits of international working or volunteering (from now on

1  
2  
3 referred to as 'international placements' for ease), has reported similar PPD outcomes  
4 regardless of the host country, type of projects or individual's profession. Communication,  
5 leadership, attitude to work, flexibility and cultural awareness are frequently reported  
6 outcomes (2,6,9,12,18). However, from an educational perspective, precise information  
7 about this learning (process, outcomes, variables) is seldom reported. In a recent meta-  
8 synthesis and Delphi study, we reported a list of 116 outcomes (5) from a review of  
9 literature on international placements for healthcare professionals. The list included  
10 benefits and costs that were agreed by stakeholders to be frequently experienced by  
11 health professionals (of any cadre) in an international placement. Costs (e.g. health  
12 outcomes, financial loss, clinical de-skilling) are not reported in this paper, but can we  
13 found in the meta-synthesis (5). We also summarised the moderating (factors that affect  
14 the strength of a relationship) and mediating variables (factors that explain the relationship  
15 between two items) that were reported in the literature to potentially affect PPD outcomes  
16 (e.g. length of stay, host country, level of experience, supervision).  
17  
18  
19  
20  
21  
22  
23  
24  
25  
26  
27  
28

29 There have been some attempts to quantify these outcomes, for example, a small number  
30 of previous UK papers have used a questionnaire approach to understand outcomes  
31 (8,19,20), but these have not taken a psychometric approach to the measurement of  
32 underpinning domains of learning (i.e. developed and tested an evidence based  
33 questionnaire). A number of psychometric questionnaires have been developed outside of  
34 the UK, but are based on non-domain specific outcomes for any professional, hence are  
35 not specific to healthcare professionals (21–23). For example, the IVIS used latent trait  
36 analysis and found 11 'volunteer outcome' factors including open-minded and intercultural  
37 relationships (24). It is not known whether there are unique elements of learning or  
38 outcomes that are specific to healthcare professionals (from within the NHS) that differ  
39 from the non-domain specific learning measured in existing tools. Particularly as some of  
40 the qualitative research suggests unique outcomes, for example related to patient  
41 interaction (9,25).  
42  
43  
44  
45  
46  
47  
48  
49  
50  
51  
52

53 This study aimed to create a measure of the PPD outcomes of international placements.  
54 We worked on the large set of outcomes that stakeholders agreed were core outcomes  
55 from international placements for health professionals (2). We aimed to reduce the items  
56 to a short questionnaire using item response theory to establish and test a set of latent  
57 traits and their associated questions.  
58  
59  
60



## **Methods**

### **Design**

We followed traditional tool development methods in order to develop a measurement tool (26). In summary, we took the PPD outcomes found in the previous study (27), made them into questions and then reduced their number through a process of piloting with health professionals and using statistical methods to eliminate items which were not congruent with other items or were redundant because they were too congruent with other items. We used a cross-sectional design, so participants were measured only at one time point. The study used Item Response Theory, whereby 'constructs' are theoretical terms that refer to unobserved, idealised entities (28). Latent traits are one type of construct, which are qualities possessed by individuals that can change, but only over the long term (28). Latent traits include attitudes, preferences and dispositions, but also elements that are important for professional development such as ability, expertise and aptitude (29). No measure of a latent trait is ever considered perfectly accurate, instead different measures are used to estimate latent traits (30), with varying levels of effectiveness (28).

### **Participants**

Previous psychometric research on the sample size requirements for precise estimates of reliability coefficients; suggested we needed 400 participants (31). We therefore aimed to recruit the 400 participants across 4 different groups: 100 health professionals that had been on international placements in the past, 100 who were about to undertake an international placement or currently working overseas, 100 with an interest in international placements but no past experience and 100 with no interest in or past experience of international placements. We included health professionals who had and who had not worked internationally. It is usual to do item reduction with a sample of the population who will be using the tool. Since the tool could be used to compare PPD in health professionals with or without international experience or before and after international experience, we decided to include, in the sample, health professionals without international experience. We further subdivided our sample into people who were interested in international experience and not to

1  
2  
3 ensure that the tool items were reduced on the basis of answers from people with all  
4 ranges of experience and perceptions of international placements. Participants were  
5 not excluded based on the years since NHS employment, provided they had this  
6 experience at some point. Inclusion criteria were that the participant be or have been  
7 an NHS employee (current or past), working/worked in a patient facing role as a  
8 qualified healthcare professional.  
9  
10  
11  
12  
13

## 14 Procedure

### 17 **Creating the pilot questionnaire**

19 We developed a questionnaire based on the core outcome set reported in our  
20 previous paper (5). Two members of the team looked for common inductive, themes  
21 across the outcomes (LBD, NT). We found experience, confidence and attitudes,  
22 where outcomes were to do with experience, we categorised them as experience  
23 and asked about the experiences they had during a suitable time period. If  
24 statements were about how confident they felt or attitudes they held, we categorised  
25 them as such and asked questions in that way. Statements were self-reported in  
26 terms of strength of agreement using a 7-point Likert scale. Where the core  
27 outcome reported in the previous paper, could be interpreted in multiple ways, we  
28 referred back to the original papers where the outcome was originally reported from  
29 the metasynthesis (5) and used this to make decisions about how to express the  
30 statement. If a statement could indicate change in experience, confidence and / or  
31 attitude, we developed questions for each.  
32  
33  
34  
35  
36  
37  
38  
39  
40  
41  
42

43 Two members of the team (LBD, NT) assessed each core outcome and generated  
44 103 statements with Likert scales of agreement for each statement (from strongly  
45 disagree to strongly agree). We excluded 40 items from the core outcome set which  
46 would not be measurable through self-report questionnaires. These were items  
47 about organisational outcomes for the NHS (8), outcomes that were too vague to be  
48 specifically defined (8) or overlapped in meaning with another and were combined  
49 (24). For example, '*exposure to ethical dilemmas*' and '*increased awareness  
50 of/knowledge about ethics*' were combined into '*I have frequently experienced ethical  
51 dilemmas*'. See supplementary material for a record of the decisions and their  
52 reasons. In addition 7 items from the Satisfaction with Life Scale were added (REF).  
53  
54  
55  
56  
57  
58  
59  
60

1  
2  
3 We included 56 statements about the frequency with which the individual had an  
4 experience or exhibited certain behaviour in the last month (regardless of where this  
5 last month's work took place). For example, 'In the last month I frequently dealt with  
6 difficult people'. We generated 19 confidence statements. For example, 'I am  
7 confident in my ability to teach others'. Other statements, which were more about  
8 attitudes and feelings were labelled included, for example, 'I have an excellent work  
9 ethic', (n=35). Supplementary material shows the matches between the outcomes  
10 and statements.  
11  
12  
13  
14  
15  
16

### 17 **Pre-pilot**

18  
19  
20 The questionnaire was pre-piloted on sixteen participants, including seven from the  
21 MOVE research group (a group of Salford/Manchester researchers involved in  
22 similar research), to establish that the questionnaire was readable and  
23 understandable. We administered the tool online using eForms (32). The authors,  
24 plus the wider institutional team of researchers in international placements, met face-  
25 to-face to consider all of the written comments from the pilot. We conducted a  
26 cognitive interview with four participants, using both think aloud interviewing and  
27 verbal probing, whereby participants were questioned/asked to think aloud as they  
28 completed the questionnaire (33,34). Any comments, issues, questions or  
29 suggestions raised during the cognitive interviews were inputted into a table, one  
30 member of the team (NT) decided how best to act on each one and whether  
31 changes needed to be made. The table was then reviewed by another team member  
32 (LBD) and disagreements were discussed and resolved. This resulted in numerous  
33 changes being made to the statements, including using an existing life satisfaction  
34 scale (SWLS), previous research suggest using an existing validated for scale if one  
35 exists and the cognitive interviews and pre-pilot process highlighted the necessity to  
36 do this (26). As a result of this process a 110-item tool was created for the pilot  
37 phase.  
38  
39  
40  
41  
42  
43  
44  
45  
46  
47  
48  
49  
50  
51  
52  
53  
54

### 55 **Pilot**

56  
57 There were two methods of recruitment: online and face-to-face. Face-to-face  
58 participants were recruited using an opportunistic sample at health professional  
59  
60

1  
2  
3 events nationwide (conferences, training events, exhibitions), many of which had an  
4 international focus (the majority of the sample gained this way were nurses and  
5 nursing assistants). Online participants were recruited in numerous ways, including  
6 links to the questionnaire posted on international volunteering blogs and in health  
7 professional newsletters and bulletins. The majority of the online sample was  
8 gathered using snowball sampling with key contacts within companies, projects and  
9 hospital health links that place professionals internationally agreed to send the link  
10 via email to health professionals, the majority of the doctors were responded online.

11  
12 The tool was completed by participants either online or face-to-face, as was  
13 convenient and appropriate for the participants. Online participants received a link in  
14 an email, blog or online community and after giving consent. Face-to-face  
15 participants completed a paper version of the questionnaire. Of the 43 organisations  
16 that helped us recruit, 9 involved face-to-face recruitment (21%). Recruitment took  
17 place between April and July 2016.

## 28 **Materials:**

### 29 **Measure**

30  
31 The tool consisted of 110 statements measured on a 7-point Likert scale ranging  
32 from strongly agree to strongly disagree. The Likert scale contained the following  
33 descriptors: 1 Strongly Agree, 2, 3, 4 Neither Agree not Disagree, 5, 6, 7 Strongly  
34 Disagree (this was reverse coded for analysis as higher intensity ordinal constructs  
35 need to be higher values, strongly agree at 7, strongly disagree at 1). No statements  
36 were reversed.

37  
38 An additional existing scale was used within the tool, the Satisfaction with Life Scale  
39 (SWLS) (35). This is a five-item scale that has been used frequently to measure  
40 satisfaction with life. This replaced a number of statements from the core outcome  
41 set about satisfaction with life, since the questions had already been refined and  
42 tested for validity and reliability and guidelines suggest using existing scales where  
43 possible (26,35).

44  
45 In addition to the 110 statements, participants demographic and placement data was  
46 also gathered. Each participant was asked basic demographic questions: age,  
47 gender, profession, employment status, nationality and years since registration.  
48  
49  
50  
51  
52  
53  
54  
55  
56  
57  
58  
59  
60

Past experience on international placements was also recorded (country, length of stay).

## **Analyses**

### **Principal Component Analysis**

We used successive iterations of principal component analysis to reduce the pool of items, so that only the items with optimal psychometric properties would remain.

Principal Component Analysis (PCA) is a dimension-reduction tool that can be used to reduce a large set of items to a small set that still contains most of the information in the large set (36). Initially, a parallel analysis was performed to determine the number of factors. Items with low communalities ( $<0.500$ ) or loadings below 0.3 were withdrawn in subsequent iterations. In the final iterations, exclusions were performed at an item-by-item basis. We decided that even if there were more items in one domain we would retain them if they had adequate psychometric properties. PCA was performed in IBM SPSS 23 (37).

### **Multidimensional Item Response Theory**

We created a multidimensional item response theory (MIRT) model, based on the results of the best iteration of the PCA in order to test the structure of the factors we found and remove any items which did not improve the assessment of each factor. MIRT is analogous to confirmatory factor analysis (CFA) (38) but, unlike CFA, MIRT considers all Likert scale variables as categorical, which is more appropriate for our data. MIRT parameters in this study were estimated using weighted least squares means- and variance-adjusted, given their appropriateness for categorical variables in comparison to Bayesian estimation, which would be an operationally attractive alternative, given the high dimensionality of the data (39). MIRT analysis was performed in Mplus 8 (40).

### **Patient and Public Involvement**

No patient involved

## **Results**

### **Pilot**

## Participants

Four hundred and thirty six participants completed the questionnaire, 42% (182/436) of participants had no international experience (Table 1).

**Table 1: Participants: Anticipated and Actual Numbers**

| Group                                       | Target | N included (%)                                           | Percentage of target |
|---------------------------------------------|--------|----------------------------------------------------------|----------------------|
| Currently Overseas/Due to Depart            | 100    | 79 (18%)<br>(26 Currently Overseas.<br>53 Due to Depart) | 79%                  |
| Past International Experience               | 100    | 169 (39%)                                                | 169%                 |
| No International Experience- Interested     | 100    | 78 (18%)                                                 | 78%                  |
| No International Experience- Not Interested | 100    | 104 (24%)                                                | 104%                 |
| Total                                       | 400    | 436 (100%)                                               | <b>109%</b>          |

All participants were NHS employees (past or present). Staff group representation was largely in line with the NHS North West employee data (41), whereby 30% of the workforce is nursing and midwifery (Table 2). The other staff groups were also relatively proportionate, besides Medical and Dental which represents only 9% of the North West workforce and support to staff (28%). This suggests that any item reduction based on variability in responses from the sampled group were largely representative of the NHS workforce. Table 3 shows the participant demographics.

**Table 2: Professions of participants**

| Staff group                 | n   | Pilot sample | NHSNW (41) |
|-----------------------------|-----|--------------|------------|
| Medical and Dental          | 146 | 34%          | 9%         |
| Nursing and Midwifery       | 135 | 31%          | 30%        |
| Allied Health Professionals | 64  | 15%          | 6%         |
| Healthcare Scientists       | 13  | 3%           | 3%         |
| Ambulance                   | 13  | 3%           | 2%         |
| Support to clinical staff   | 30  | 7%           | 28%        |
| NHS infrastructure support  | 5   | 1%           | 18%        |

|                                           |    |    |     |
|-------------------------------------------|----|----|-----|
| Other scientific, therapeutic & technical | 3  | 1% | 4%  |
| Other                                     | 25 | 6% | <1% |

**Table 3: Participant Demographic Information: age, employment status, nationality, gender and career stage (years since registration was used as a proxy measure of experience)**

| Age          | n   | Employment status | n   | Nationality  | n   | Years since registration | n   | Gender | n   |
|--------------|-----|-------------------|-----|--------------|-----|--------------------------|-----|--------|-----|
| Under 25     | 35  | Full Time         | 325 | British      | 350 | <5 Years                 | 98  | Male   | 113 |
| 26-30        | 76  | Part Time         | 72  | English      | 7   | 6 to 15                  | 137 | Female | 323 |
| 31-40        | 127 | Retired           | 20  | Irish        | 11  | 16 to 25                 | 60  | Total  | 436 |
| 41-50        | 84  | Student           | 16  | Scottish     | 4   | 26+                      | 94  |        |     |
| 51-60        | 81  | Unemployed        | 3   | Welsh        | 1   | Total                    | 389 |        |     |
| 61-70        | 32  | Total             | 436 | N Irish      | 2   | Missing Data             | 47  |        |     |
| Total        | 435 |                   |     | EU           | 12  |                          |     |        |     |
| Missing Data | 1   |                   |     | Non EU       | 28  |                          |     |        |     |
|              |     |                   |     | Dual         | 7   |                          |     |        |     |
|              |     |                   |     | British      |     |                          |     |        |     |
|              |     |                   |     | Total        | 422 |                          |     |        |     |
|              |     |                   |     | Missing Data | 14  |                          |     |        |     |

### Principal Component Analysis

The principal component analysis used the correlation matrix obtained from the application of the questionnaire to the 436 participants. The 436 responses included those with no international experience to account for the range of variability in response across the NHS workforce, regardless of experience. Twenty-one iterations of principal component analysis were performed. From the original set of



items, only 40 items were chosen for the last iteration of the principal component analysis. The Kaiser-Meyer-Olkin measure showed the level of sampling adequacy to be acceptable (KMO = 0.896). The lowest measure of sample adequacy for an individual item was 0.810 ("*I demonstrated I'm a good teacher*"). The Bartlett's sphericity test indicated that the inter-item correlations were sufficient for proceeding with the analysis. The lowest value for the items' communalities was 0.590 ("*If I could live my life over, I would change almost nothing*"), which is above the aimed threshold of 0.500. After *varimax* rotation, 10 factors were extracted taking into account the findings of the scree plot and of a Monte Carlo parallel analysis. The 10 factors explained 71.80% of the variance. On the scree plot (see Figure 1) it is possible to observe that the first five factors had the highest eigenvalues.

### Multi-Dimensional Item Response Theory

The diagram with the resulting model; which contains the items selected for each one of the latent variables, the loadings for each item and the correlation coefficients between the constructs, can be seen in Figure 2. This model was chosen as it was the best possible solution to reconcile the need of creating a comprehensive, content-rich questionnaire while obtaining satisfactory evidence of validity based on its internal structure. In terms of goodness-of-fit, the model had significantly better fit than a unidimensional solution in the chi-square test for difference testing ( $\chi^2 = 2889.749$ ,  $df = 45$ ,  $p < 0.001$ ). The comparison of goodness-of-fit indices between the unidimensional solution and the proposed model can be observed in Table 4. The chi-square is not the chi-square of any model but the chi-square of the difference of the chi-squares of each model separately.

**Table 4 – Comparison of selected goodness-of-fit indices between the unidimensional model and the proposed model.**

| Models         | $\chi^2$ | df  | $\chi^2/df$ | RMSEA | CFI   | TLI   | WRMR  |
|----------------|----------|-----|-------------|-------|-------|-------|-------|
| Unidimensional | 8206.204 | 740 | 11.089      | 0.152 | 0.641 | 0.622 | 3.511 |
| Proposed model | 1736.922 | 695 | 2.499       | 0.059 | 0.950 | 0.944 | 1.271 |



**Table 5- Cronbach's alpha co-efficient for each construct**

| Construct               | Cronbach's alpha |
|-------------------------|------------------|
| Adapting Communication  | 0.88             |
| Confidence              | 0.86             |
| Life satisfaction       | 0.86             |
| Difficult communication | 0.86             |
| Management skills       | 0.86             |
| Attitude to work        | 0.82             |
| Flexibility             | 0.83             |
| Teaching skills         | 0.78             |
| Behaviour Change        | 0.77             |
| Cultural awareness      | 0.72             |

Reliability estimates were calculated using Cronbach's alpha coefficients but also using estimates of individual precision calculated based on the individual estimates of the standard errors of measurement. Figure 1 shows the precision curves for each latent variable. While "Confidence", "Life Satisfaction" and "Attitudes to Work" had the highest means for the individual precision estimates, "Adaptability" was the construct that achieved the highest precision estimates for most of the theta spectrum. "Attitude to work" had the lowest estimates for individual precision. Using the information functions as indicators of precision, "Flexibility" achieved the highest values and "Attitude to work", the lowest ones. As expected, an inverse situation is observable on the curves for the standard errors of measurement, with "Flexibility" showing the lowest measurement errors and "Attitude to work" the highest ones. The precision, information and standard error curves for the retrieved constructs under the MIRT analysis can be observed in Figures 3, 4 and 5. The precision, information and SE curves demonstrate that the quality of the measures for each one of the proposed constructs varies across the latent spectrum, with lower levels of reliability and information and higher levels of standard error of measurement in the extremes of the latent spectrum. The extreme right side of the spectrum has the worst reliability and highest error. The information curve, therefore, is indirect evidence of reliability with the advantage of being sample-independent.

1  
2  
3 Table 5 shows the Cronbach's alpha coefficients for each one of the retrieved  
4 constructs. Taking the Cronbach's alpha coefficients into account, the reliability  
5 estimates are somewhat divergent from the MIRT-based precision estimates. Using  
6 Cronbach's alpha, the most reliable factor was "Adapting Communication" and the  
7 least reliable was "Cultural Awareness".  
8  
9

10  
11  
12 The analysis resulted in 40 items grouped into 10 constructs, the final list of constructs  
13 and the items that belong on each can be seen in Table 6. Table 6 also shows the  
14 loading estimates, the standard errors of the loading estimates, the ratios between the  
15 estimate and the standard error and the two-tailed  $p$ -values for the estimates. Table 6  
16 shows the final selection of items with the dimension each one of them belongs.  
17  
18  
19  
20  
21

22 **<insert table 6>**

23  
24 **<insert figures 1-5>**

## 25 26 27 **Discussion**

28  
29 In this study we converted stakeholder agreed PPD outcomes of health professional  
30 international placements (27) into outcome statements, to assess which have the  
31 best psychometric properties for self-assessment. By piloting these statements with  
32 a large set of healthcare professionals and using item response theory to establish  
33 and test a set of latent traits and their associated questions, we were able to  
34 determine the 40 items with the best psychometric properties to create the MOVEiT  
35 tool. Reliability evidence is favourable to the latent trait structure, both when using a  
36 single coefficient for the entire sample, and under the multidimensional item  
37 response theory approach. The validity evidence based on the internal structure of  
38 the questionnaire detailed in this study, combined with the content validity evidence  
39 based on the selection of the initial pool of items (5) helps build a strong validity  
40 argument in favour of the use of this questionnaire for the measurement of PDD-  
41 related dimensions of international placements. There were many more outcomes  
42 retained within the confidence domain as there were more items in the original data  
43 that we about confidence, and these items demonstrated more variability in  
44 responses regarding what people were confident about. We kept this as a large  
45 domain as we didn't want to lose the richness of that data.  
46  
47  
48  
49  
50  
51  
52  
53  
54  
55  
56  
57  
58  
59  
60

1  
2  
3 This paper aimed to consider whether a unique tool is needed to assess outcomes of  
4 UK healthcare professionals as a unique professional group, due to the qualitative  
5 reports of healthcare specific (i.e. patient interaction outcomes) in the literature  
6 (9,25). We found that six of the outcome statements included in the MOVEiT tool  
7 were specific to healthcare professionals (i.e. I am confident in my ability to manage  
8 myself in a clinical environment). However, if one were to reduce the health specificity  
9 of the wording (for example, change the word clinical to work, or patient to customer)  
10 the tool has similarities to other psychometric measures introduced earlier in this  
11 paper (21,22). These similarities provide support for the application of all measures  
12 and suggest that MOVEiT could be applicable outside of healthcare.  
13  
14  
15  
16  
17  
18  
19  
20

21 The 40 outcome statements that we found to have the best psychometric properties  
22 fell within the main outcome categories reported in past literature. For example,  
23 communication, leadership, attitude to work, cultural awareness are frequently  
24 reported outcomes in the literature and domains within this tool (2,6,9,12,18). In our  
25 previous work we criticise the current evidence base for being too vague in outcome  
26 reporting, as many papers report communication, leadership and cultural awareness  
27 as broad outcomes, rather than specify the relevant components within each that  
28 develop (specific skills, knowledge or attitudes) (2,5,12). By using psychometric tests  
29 to assess latent traits, we further highlight the necessity for specific outcome  
30 reporting, as we found outcome statements associated with adapting communication  
31 and difficult communication to be two unique latent traits, rather than a single entity.  
32  
33  
34  
35  
36  
37  
38  
39  
40

41 We hope that any healthcare professionals as individuals, project managers, or NHS  
42 trusts may choose to use the tool in both a within or between participant manner  
43 (comparing outcomes pre and post international placements and comparing staff  
44 with and without international experience). By collecting data using the MOVEiT tool  
45 and the variable statements developed in our previous work (to assess moderating  
46 or mediating variables that may affect outcomes), future researchers could begin to  
47 gather precise information about this learning (process, outcomes, variables) (5).  
48 This should also be considered against measures of the list of costs reported in our  
49 previous work (5), as there is considerable literature regarding the ethical concerns  
50 of medical practice in LMICs, particularly when staff practice skills that they could not  
51 in a high income country (42,43). If mutual benefits could be evidenced using  
52 metrics, and costs minimised/mitigated by assessing the elements that increase  
53  
54  
55  
56  
57  
58  
59  
60

1  
2  
3 mutual benefits, employers may be less reluctant to release staff to undertake such  
4 work (1,6). Particularly is evidence suggests that such work, may be beneficial for  
5 the LMIC, the NHS and the individual professional.  
6  
7

8  
9 Going forward we hope to develop a larger set of data; which will a) help us  
10 understand in more detail the processes associated with the outcomes and b)  
11 assess more thoroughly the reliability and validity of the tool c)adapt or reduce the  
12 tool further based on future data and d) assess sensitivity of the tool to change.  
13  
14  
15  
16  
17

## 18 **Limitations**

19  
20  
21 The tool only includes items which are either psychometrically related, or show  
22 variability of response. This means that many items that stakeholders considered  
23 important for inclusion in the core outcome set were not represented within the tool  
24 (5). This tool, therefore, compliments rather than replaces other tools which  
25 professionals to reflect on all components of their PPD (19). This tool provides a way  
26 of evidencing benefits, however there is a body of critical evidence outlining the  
27 ethical concerns of medical practice abroad, particularly when individuals practice in  
28 ways that they might not in a high-income country (43,44). A full cost-benefit analysis  
29 of this phenomena can be found in the authors other work (15), the authors only  
30 advocate benefits in mutually-beneficial, sustainable, ethical placements.  
31  
32  
33  
34  
35  
36  
37  
38

## 39 **Conclusion**

40  
41 This evidence-based 40-item psychometric tool for self-assessment of outcomes  
42 from international placements (MOVEit) could be used in research and practice.  
43 Future work will reveal if the tool has the sensitivity to detect change in the domains.  
44  
45  
46  
47

## 48 **Ethics**

49  
50 Ethical approval was granted via the University of Salford (ref HSCR14/58) and the  
51 University of Manchester Research Ethics Committee (ref 14185).  
52  
53  
54

## 55 **List of Abbreviations**

56  
57  
58 CFA- Confirmatory Factor Analysis  
59  
60

1  
2  
3 GHE- Global Health Exchange  
4

5  
6 HEE- Health Education England  
7

8  
9 HCA- Healthcare Assistant  
10

11  
12 HIC- High Income Country  
13

14  
15 LMIC- Low and Middle-income Country  
16

17  
18 MIRT- Multivariate Item Response Theory  
19

20  
21 NHS- National Health Service  
22

23  
24 NHSNW- National Health Service North West  
25

26  
27 PCA- Principle Component analysis  
28

29  
30 PPD- Personal and Professional Development  
31

32  
33 SWLS- Satisfaction with Life Scale  
34

### 35 **Declarations**

### 36 37 **Ethics approval and consent to participate**

38  
39  
40  
41 Approval for the study was obtained from the Ethical Research Committee,  
42  
43 University of Salford, and the University of Manchester Research Ethics Committee.  
44

45  
46 Participants gave informed consent.  
47

### 48 49 **Consent for publication**

50  
51  
52 Not applicable  
53

### 54 55 **Availability of data and material** 56 57 58 59 60

1  
2  
3 The datasets used and/or analysed during the current study are available from the  
4  
5 corresponding author on reasonable request.  
6  
7

### 8 9 **Competing interests**

10  
11  
12 Professor Ged Byrne is the Director of Global Engagement for Health Education  
13  
14 England. The other authors declare no competing interests.  
15  
16

### 17 18 **Funding**

19  
20  
21 This work was supported by a project development grant from Health Education  
22  
23 England (HEE), through the Global Health Exchange (GHE). Grant ref. NURA54  
24  
25  
26

### 27 28 **Author contributions**

29  
30  
31 NT participated in the design of the study, conducted the pilot and drafted the  
32  
33 majority of the manuscript. LBD conceived the design of the study, analysed data  
34  
35 and contributed significantly to drafting the manuscript. CC provided oversight to the  
36  
37 study design, conducted the PCA and statistical analysis and drafted the manuscript,  
38  
39 GB provided oversight of study design, helped recruit participants and drafted the  
40  
41 manuscript. All authors participated in the coordination of the research and read and  
42  
43 approved the final manuscript.  
44  
45  
46  
47

### 48 49 **Acknowledgements**

50  
51 We would like to thank Anya Ahmed, Louise Ackers, Natalie Tate, Eileen  
52  
53 Cunningham, John Chatwin, Hassan Osman and James Ackers-Johnson for being  
54  
55 involved in the wider MOVE project.  
56  
57  
58  
59  
60

1  
2  
3 We would like to thank all of the stakeholders and participant groups involved for  
4  
5 their significant contribution of time and effort.  
6  
7

8  
9 The full title of the study from which this analysis was derived was: Measuring the  
10  
11 outcomes of volunteering for education (MOVE). The study was funded by Health Education  
12  
13 England (Global Health Exchange). The research team were independent from the funding  
14  
15 agency. The views expressed in this publication are those of the authors and not  
16  
17 necessarily those of Health Education England or the Department of Health  
18  
19  
20  
21  
22

### 23 **References**

- 24  
25  
26 1. Crisp N. Mutual learning and reverse innovation--where next? Global Health  
27 [Internet]. 2014 Jan [cited 2014 Aug 4];10(1):14. Available from:  
28 <http://www.pubmedcentral.nih.gov/articlerender.fcgi?artid=3986825&tool=pmc>  
29 <http://www.pubmedcentral.nih.gov/articlerender.fcgi?artid=3986825&tool=pmc>  
30 [entrez&rendertype=abstract](http://www.pubmedcentral.nih.gov/articlerender.fcgi?artid=3986825&tool=pmc)  
31  
32
- 33  
34 2. Sikka N. All aboard with Impact India. Br Dent J [Internet]. 2009 Oct 24 [cited  
35 2016 May 19];207(8):401–3. Available from:  
36 <http://www.ncbi.nlm.nih.gov/pubmed/19851412>  
37  
38
- 39  
40 3. Wood JB, Hills E, Keto FJ. Hands across the equator: the Hereford-Muheza  
41 link eight years on. BMJ [Internet]. 1994 Apr 16 [cited 2015 Jul  
42 22];308(6935):1029–32. Available from:  
43 <http://www.pubmedcentral.nih.gov/articlerender.fcgi?artid=2539885&tool=pmc>  
44 [entrez&rendertype=abstract](http://www.pubmedcentral.nih.gov/articlerender.fcgi?artid=2539885&tool=pmc)  
45  
46  
47
- 48  
49 4. Kosack CS. Experience of Médecins Sans Frontières in laboratory medicine in  
50 resource-limited settings. Clin Chem Lab Med [Internet]. 2012 Jul 1 [cited 2019  
51 Apr 25];50(7):1221–7. Available from:  
52 <https://www.degruyter.com/view/j/cclm.2012.50.issue-7/cclm-2011-0618/cclm->  
53 [2011-0618.xml](https://www.degruyter.com/view/j/cclm.2012.50.issue-7/cclm-2011-0618/cclm-)  
54  
55  
56
- 57  
58 5. Tyler N, Chatwin J, Byrne G, Hart J, Byrne-Davis LMT. The benefits of  
59  
60

- 1  
2  
3 International volunteering in a low-resource setting: Development of a core  
4 outcome set.  
5  
6  
7  
8 6. Jones FA, Knights DP, Sinclair VF, Baraitser P. Do health partnerships with  
9 organisations in lower income countries benefit the UK partner? *Global Health*  
10 [Internet]. 2013;9(1):38. Available from:  
11 <http://www.pubmedcentral.nih.gov/articlerender.fcgi?artid=3766651&tool=pmc>  
12 <http://www.pubmedcentral.nih.gov/articlerender.fcgi?artid=3766651&tool=pmc>  
13 <http://www.pubmedcentral.nih.gov/articlerender.fcgi?artid=3766651&tool=pmc>  
14 <http://www.pubmedcentral.nih.gov/articlerender.fcgi?artid=3766651&tool=pmc>  
15 <http://www.pubmedcentral.nih.gov/articlerender.fcgi?artid=3766651&tool=pmc>  
16  
17 7. Abell C, Taylor S. The NHS benefits from doctors working abroad. *BMJ*  
18 [Internet]. 1995 Jul 8 [cited 2015 Nov 16];311(6997):133–4. Available from:  
19 <http://www.bmj.com/content/311/6997/133>  
20  
21  
22  
23 8. Kiernan P, O’Dempsey T, Kwalombota K, Elliott L, Cowan L. Evaluation of  
24 effect on skills of GP trainees taking time out of programme (OOP) in  
25 developing countries. *Educ Prim Care* [Internet]. 2014 Mar [cited 2015 Jul  
26 22];25(2):78–83. Available from:  
27 <http://www.ncbi.nlm.nih.gov/pubmed/24593970>  
28  
29  
30  
31  
32 9. Norton D, Marks-Maran D. Developing cultural sensitivity and awareness in  
33 nursing overseas. *Nurs Stand* [Internet]. 2014 Jul 2 [cited 2016 Jan  
34 28];28(44):39–43. Available from:  
35 <http://www.ncbi.nlm.nih.gov/pubmed/24985303>  
36  
37  
38  
39  
40 10. Standage R, Randall D. The benefits for children’s nurses of overseas  
41 placements: where is the evidence? *Issues Compr Pediatr Nurs* [Internet].  
42 2014 Jun [cited 2015 Jul 22];37(2):87–102. Available from:  
43 <http://www.ncbi.nlm.nih.gov/pubmed/24495156>  
44  
45  
46  
47  
48 11. Hockey P, Tobin A, Kemp J, Kerrigan J, Kitsell F, Green P, et al. Global health  
49 partnerships: leadership development for a purpose. Vol. 22, *Leadership in*  
50 *Health Services*. 2009. p. 306–16.  
51  
52  
53  
54 12. Dean E. “Tanzania changed me”. *Nurs Stand* [Internet]. 2013 [cited 2014 Dec  
55 29];27(52):16–7. Available from:  
56 <http://www.ncbi.nlm.nih.gov/pubmed/23980965>  
57  
58  
59  
60 13. Lumb A, Murdoch-Eaton D. Electives in undergraduate medical education:



- AMEE Guide No. 88. Med Teach [Internet]. 2014;36:557–72. Available from: <http://www.ncbi.nlm.nih.gov/pubmed/24787526>
14. Button L, Green B, Tengahan C, Johansson I, Baker C. The impact of international placements on nurses' personal and professional lives: literature review. J Adv Nurs [Internet]. 2005 May [cited 2015 Jun 9];50(3):315–24. Available from: <http://www.ncbi.nlm.nih.gov/pubmed/15811111>
  15. Ackers HL, Ackers-Johnson J, Chatwin J, Tyler N. Healthcare, Frugal Innovation, and Professional Voluntarism [Internet]. Cham: Springer International Publishing; 2017 [cited 2017 May 25]. Available from: <http://link.springer.com/10.1007/978-3-319-48366-5>
  16. Tropical Health Education Trust. In our mutual interest [Internet]. 2017. Available from: <https://www.thet.org/wp-content/uploads/2017/08/In-Our-Mutual-Interest.pdf>
  17. Crisp N. Turning the world upside down : the search for global health in the twenty-first century. Royal Society of Medicine Press; 2010. 228 p.
  18. Wright J, Walley J, Philip A, Petros H, Ford H. Research into practice: 10 years of international public health partnership between the UK and Swaziland. J Public Health (Oxf). 2010;32:277–82.
  19. Longstaff B. Toolkit for the collection of evidence of knowledge and skills gained through participation in an international health project.
  20. Smith C, Pettigrew LM, Seo H-N, Dorward J. Combining general practice with international work: online survey of experiences of UK GPs. Vol. 3, JRSM Short Reports. 2012. p. 46–46.
  21. Lough BJ, McBride AM, Sherraden MS. Measuring Volunteer Outcomes Development of the International Volunteer Impacts Survey Measuring Volunteer Outcomes: Development of the International Volunteer Impacts Survey. Online. 2009.
  22. Hammer MR, Bennett MJ, Wiseman R. Measuring intercultural sensitivity: The intercultural development inventory. Int J Intercult Relations. 2003;27:421–43.

- 1  
2  
3 23. Braskamp L, Braskamp D, January KM-R, 2008 undefined. Global  
4 Perspective Inventory (GPI): Its purpose, construction, potential uses, and  
5 psychometric characteristics. academia.edu [Internet]. [cited 2019 Apr 18];  
6 Available from: <http://www.academia.edu/download/44637248/manual.pdf>  
7  
8  
9
- 10  
11 24. Lough BJ, McBride AM, Sherraden MS. Perceived effects of international  
12 volunteering: Reports from alumni. St Louis, MO: Center for Social  
13 Development, Washington University. 2009.  
14  
15
- 16  
17 25. Briscoe L. Becoming culturally sensitive: A painful process? Midwifery  
18 [Internet]. 2013 [cited 2015 Jul 22]; Available from:  
19 <http://www.sciencedirect.com/science/article/pii/S0266613811001331>  
20  
21  
22
- 23 26. Streiner DL, Norman GR, Cairney J. Health Measurement Scales [Internet].  
24 Vol. 1. Oxford University Press; 2015 [cited 2019 Apr 18]. Available from:  
25 [http://www.oxfordmedicine.com/view/10.1093/med/9780199685219.001.0001/](http://www.oxfordmedicine.com/view/10.1093/med/9780199685219.001.0001/med-9780199685219)  
26 [med-9780199685219](http://www.oxfordmedicine.com/view/10.1093/med/9780199685219.001.0001/med-9780199685219)  
27  
28  
29
- 30  
31 27. Tyler N, Chatwin J, Byrne G, Hart J, Byrne-Davis L. The benefits of  
32 international volunteering in a low-resource setting: development of a core  
33 outcome set. Hum Resour Health [Internet]. 2018 Dec 20 [cited 2019 Jan  
34 1];16(1):69. Available from: [https://human-resources-](https://human-resources-health.biomedcentral.com/articles/10.1186/s12960-018-0333-5)  
35 [health.biomedcentral.com/articles/10.1186/s12960-018-0333-5](https://human-resources-health.biomedcentral.com/articles/10.1186/s12960-018-0333-5)  
36  
37  
38  
39
- 40 28. Wu M, Ping H, Jen T. Educational Measurement for Applied Researchers  
41 [Internet]. 2017 [cited 2017 May 15]. 22 p. Available from:  
42 [https://books.google.co.uk/books?id=EOHTDQAAQBAJ&pg=PA22&lpg=PA22](https://books.google.co.uk/books?id=EOHTDQAAQBAJ&pg=PA22&lpg=PA22&dq=tap+into+latent+traits&source=bl&ots=KNzd0XfZxn&sig=754d3_DYxsS8Hh2DBt_ny9h8Uf0&hl=en&sa=X&ved=0ahUKEwj-8rbsmPLTAhVIJ8AKHcFEAkoQ6AEILDAB#v=onepage&q=tap%20into%20latent%20traits&f=false)  
43 [&dq=tap+into+latent+traits&source=bl&ots=KNzd0XfZxn&sig=754d3\\_DYxsS8](https://books.google.co.uk/books?id=EOHTDQAAQBAJ&pg=PA22&lpg=PA22&dq=tap+into+latent+traits&source=bl&ots=KNzd0XfZxn&sig=754d3_DYxsS8Hh2DBt_ny9h8Uf0&hl=en&sa=X&ved=0ahUKEwj-8rbsmPLTAhVIJ8AKHcFEAkoQ6AEILDAB#v=onepage&q=tap%20into%20latent%20traits&f=false)  
44 [Hh2DBt\\_ny9h8Uf0&hl=en&sa=X&ved=0ahUKEwj-](https://books.google.co.uk/books?id=EOHTDQAAQBAJ&pg=PA22&lpg=PA22&dq=tap+into+latent+traits&source=bl&ots=KNzd0XfZxn&sig=754d3_DYxsS8Hh2DBt_ny9h8Uf0&hl=en&sa=X&ved=0ahUKEwj-8rbsmPLTAhVIJ8AKHcFEAkoQ6AEILDAB#v=onepage&q=tap%20into%20latent%20traits&f=false)  
45 [8rbsmPLTAhVIJ8AKHcFEAkoQ6AEILDAB#v=onepage&q=tap into latent](https://books.google.co.uk/books?id=EOHTDQAAQBAJ&pg=PA22&lpg=PA22&dq=tap+into+latent+traits&source=bl&ots=KNzd0XfZxn&sig=754d3_DYxsS8Hh2DBt_ny9h8Uf0&hl=en&sa=X&ved=0ahUKEwj-8rbsmPLTAhVIJ8AKHcFEAkoQ6AEILDAB#v=onepage&q=tap%20into%20latent%20traits&f=false)  
46 [traits&f=false](https://books.google.co.uk/books?id=EOHTDQAAQBAJ&pg=PA22&lpg=PA22&dq=tap+into+latent+traits&source=bl&ots=KNzd0XfZxn&sig=754d3_DYxsS8Hh2DBt_ny9h8Uf0&hl=en&sa=X&ved=0ahUKEwj-8rbsmPLTAhVIJ8AKHcFEAkoQ6AEILDAB#v=onepage&q=tap%20into%20latent%20traits&f=false)  
47  
48  
49  
50  
51
- 52  
53 29. Hambleton RK, Cook LL. Latent Trait Models and Their use in the Analysis of  
54 Educational Test Data. J Educ Meas [Internet]. 1977 Jun [cited 2017 May  
55 15];14(2):75–96. Available from: [http://doi.wiley.com/10.1111/j.1745-](http://doi.wiley.com/10.1111/j.1745-3984.1977.tb00030.x)  
56 [3984.1977.tb00030.x](http://doi.wiley.com/10.1111/j.1745-3984.1977.tb00030.x)  
57  
58  
59  
60

- 1  
2  
3 30. Evans DB, Murray CJL. Health systems performance assessment : debates,  
4 methods and empiricism [Internet]. World Health Organization; 2003 [cited  
5 2017 May 15]. 927 p. Available from:  
6  
7 [https://books.google.co.uk/books?id=Ut\\_xcxWHobYC&pg=PA739&lpg=PA739](https://books.google.co.uk/books?id=Ut_xcxWHobYC&pg=PA739&lpg=PA739&dq=tap+into+latent+traits&source=bl&ots=jh4GceWRQt&sig=MwkVD0ZpHWATucLYNWJU9u3snMQ&hl=en&sa=X&ved=0ahUKEwj-8rbsmPLTAhVIJ8AKHcFEAkoQ6AEIMTAC#v=onepage&q=tap%20into%20latent%20traits&f=false)  
8 &dq=tap+into+latent+traits&source=bl&ots=jh4GceWRQt&sig=MwkVD0ZpHW  
9 ATucLYNWJU9u3snMQ&hl=en&sa=X&ved=0ahUKEwj-  
10 8rbsmPLTAhVIJ8AKHcFEAkoQ6AEIMTAC#v=onepage&q=tap into latent  
11 traits&f=false
- 12  
13  
14  
15  
16  
17  
18 31. Charter RA. Sample Size Requirements for Precise Estimates of Reliability,  
19 Generalizability, and Validity Coefficients. *J Clin Exp Neuropsychol*  
20 (Neuropsychology, Dev Cogn Sect A). 1999;
- 21  
22  
23  
24 32. My eForms - eForms [Internet]. [cited 2017 May 19]. Available from:  
25 <https://eforms.mhs.man.ac.uk/>
- 26  
27  
28 33. Ericsson KA, Simon HA. How to study thinking in everyday life: Contrasting  
29 think-aloud protocols with descriptions and explanations of thinking. *Mind, Cult*  
30 *Act*. 1998;
- 31  
32  
33  
34 34. Caspar RA, Lessler JT, Willis GB. Reducing survey error through research on  
35 the cognitive and decision processes in surveys. Short course Present 1999  
36 Meet Am Stat Assoc. 1999;
- 37  
38  
39  
40 35. Diener E, Emmons RA, Larsen RJ, Griffin S. The Satisfaction With Life Scale.  
41 *J Pers Assess* [Internet]. 1985 Feb 10 [cited 2014 Dec 6];49(1):71–5. Available  
42 from: [http://www.tandfonline.com/doi/abs/10.1207/s15327752jpa4901\\_13](http://www.tandfonline.com/doi/abs/10.1207/s15327752jpa4901_13)
- 43  
44  
45  
46 36. Leung W. How to design a questionnaire. *Student BMJ* [Internet]. 2001 [cited  
47 2016 Mar 31];9(11):187–9. Available from:  
48 [http://mail.cochrane.es/files/Recursos/How\\_to\\_design\\_a\\_questionnaire.pdf](http://mail.cochrane.es/files/Recursos/How_to_design_a_questionnaire.pdf)
- 49  
50  
51  
52 37. IBM Corp. IBM SPSS Statistics for Macintosh, Version 24.0. 2016. 2016;
- 53  
54  
55 38. Osteen P. An Introduction to Using Multidimensional Item Response Theory to  
56 Assess Latent Factor Structures. *J Soc Social Work Res*. 2010;
- 57  
58  
59 39. Liang X, Yang Y. An evaluation of WLSMV and Bayesian methods for  
60

- confirmatory factor analysis with categorical indicators. *Int J Quant Res Educ.* 2014;
40. Muthén L, Muthén B. *Mplus user's guide* (8th ed.). Los Angeles: Author. 2017.
41. Electronic Staff Record Programme Data Warehouse. North West Staff in post. 2013.
42. Dowell J, Blacklock C, Liao C, Merrylees N. Boost or burden? Issues posed by short placements in resource-poor settings. *Br J Gen Pract [Internet]*. 2014 Jun 1 [cited 2015 Mar 4];64(623):272–3. Available from: <http://bjgp.org/content/64/623/272.abstract>
43. Banatvala N, Doyal L. Knowing when to say “no” on the student elective. Students going on electives abroad need clinical guidelines. *BMJ [Internet]*. 1998 May 9 [cited 2016 Apr 27];316(7142):1404–5. Available from: <http://www.pubmedcentral.nih.gov/articlerender.fcgi?artid=1113113&tool=pmc-entrez&rendertype=abstract>
44. Dowell J, Merrylees N. Electives: Isn't it time for a change? *Med Educ.* 2009;43:121–6.

**Table 6: Estimated discrimination parameters from the proposed MIRT model**

| Constructs / Items | Estimate | S.E. | P-Value (two-tailed) |
|--------------------|----------|------|----------------------|
| CONFIDENCE         |          |      |                      |

| Constructs / Items                                                        | Estimate | S.E.  | P-Value (two-tailed) |
|---------------------------------------------------------------------------|----------|-------|----------------------|
| I am confident in my ability to manage myself in a clinical environment.  | 0.727    | 0.030 | 0.000                |
| I am confident in my abilities to work independently when necessary.      | 0.719    | 0.032 | 0.000                |
| I am confident in my ability to deal with the unexpected.                 | 0.743    | 0.025 | 0.000                |
| I am confident in my ability to be adaptable and innovative as a leader.  | 0.733    | 0.024 | 0.000                |
| I am confident in my ability to adapt and be flexible clinically.         | 0.823    | 0.021 | 0.000                |
| I am confident in my ability to adapt and be flexible in general.         | 0.798    | 0.021 | 0.000                |
| I am confident in my ability to find solutions despite limited resources. | 0.770    | 0.022 | 0.000                |
| I am confident in my ability to apply clinical skills to another context. | 0.721    | 0.026 | 0.000                |
| I am confident in my work.                                                | 0.724    | 0.025 | 0.000                |
| <b>LIFE SATISFACTION</b>                                                  |          |       |                      |
| In most ways my life is close to my ideal.                                | 0.834    | 0.02  | 0.000                |
| The conditions of my life are excellent.                                  | 0.783    | 0.02  | 0.000                |
| I am satisfied with my life.                                              | 0.893    | 0.017 | 0.000                |
| So far I have gotten the important things I want in life.                 | 0.776    | 0.024 | 0.000                |
| If I could live my life over. I would change almost nothing.              | 0.667    | 0.029 | 0.000                |
| Taking everything into consideration. I am satisfied with my job.         | 0.717    | 0.038 | 0.000                |
| <b>CULTURAL</b>                                                           |          |       |                      |

| Constructs / Items                                                                                                        | Estimate | S.E.  | P-Value (two-tailed) |
|---------------------------------------------------------------------------------------------------------------------------|----------|-------|----------------------|
| *I demonstrated a good awareness about how culture influences health.                                                     | 0.761    | 0.036 | 0.000                |
| *I frequently demonstrated cultural sensitivity.                                                                          | 0.881    | 0.031 | 0.000                |
| *I was constantly conscious of culture when working with patients.                                                        | 0.779    | 0.033 | 0.000                |
| <b>ADAPTING COMMUNICATION</b>                                                                                             |          |       |                      |
| *I changed the way I speak so that somebody can understand me (e.g. purposely spoke slower and clearer).                  | 0.899    | 0.024 | 0.000                |
| *I changed the way I communicate to make it more contextually appropriate (e.g.. to make it more culturally appropriate). | 0.916    | 0.025 | 0.000                |
| *I frequently relied on my non-verbal communication (e.g. hand gestures).                                                 | 0.751    | 0.032 | 0.000                |
| <b>TEACHING</b>                                                                                                           |          |       |                      |
| *I demonstrated I'm a good teacher.                                                                                       | 0.813    | 0.024 | 0.000                |
| *I adapted the way I teach to make it better for the learner.                                                             | 0.807    | 0.023 | 0.000                |
| I am confident in my ability to teach others.                                                                             | 0.883    | 0.031 | 0.000                |
| <b>DIFFICULT COMMUNICATION</b>                                                                                            |          |       |                      |
| *I demonstrated that I am skilled in challenging conversations. even in high pressure situations.                         | 0.842    | 0.025 | 0.000                |
| *I demonstrated that I am able to manage difficult people effectively.                                                    | 0.862    | 0.021 | 0.000                |
| *I frequently dealt with difficult people.                                                                                | 0.774    | 0.027 | 0.000                |
| <b>BEHAVIOUR CHANGE</b>                                                                                                   |          |       |                      |

| Constructs / Items                                                                                     | Estimate | S.E.  | P-Value (two-tailed) |
|--------------------------------------------------------------------------------------------------------|----------|-------|----------------------|
| I am able to empower patients to help themselves.                                                      | 0.807    | 0.026 | 0.000                |
| I am able to empower colleagues to help themselves.                                                    | 0.794    | 0.025 | 0.000                |
| In my work I have demonstrated skills in changing colleagues' behaviour.                               | 0.761    | 0.027 | 0.000                |
| In my work I have demonstrated skills in encouraging and supporting patients to change behaviour.      | 0.778    | 0.027 | 0.000                |
| <b>MANAGEMENT</b>                                                                                      |          |       |                      |
| *I allocated tasks.                                                                                    | 0.848    | 0.021 | 0.000                |
| *I co-ordinated colleagues.                                                                            | 0.868    | 0.02  | 0.000                |
| *I demonstrated I am able to plan and organise.                                                        | 0.907    | 0.024 | 0.000                |
| <b>ATTITUDE TO WORK</b>                                                                                |          |       |                      |
| *I was frequently proactive at work (e.g. used my initiative. got on with things. thought on my feet). | 0.778    | 0.027 | 0.000                |
| *I demonstrated that I am able to cope in work (e.g. able to deal with stress).                        | 0.763    | 0.028 | 0.000                |
| *I demonstrated that I am particularly good at working as part of team.                                | 0.765    | 0.026 | 0.000                |
| <b>FLEXIBILITY</b>                                                                                     |          |       |                      |
| *I demonstrated I'm good at dealing with the unexpected.                                               | 0.857    | 0.037 | 0.000                |
| *I frequently had to find solutions despite limited resources.                                         | 0.912    | 0.017 | 0.000                |
| *I demonstrated I am able to find solutions despite limited resources.                                 | 0.937    | 0.017 | 0.000                |

\*items preceded by \* indicate that 'In the last month' is presented ahead of that statement, providing a time reference to consider the experience.

## List of Figures

Figure 1: Scree Plot

Figure 2: Latent variables and loadings

Figure 3: Estimates for mean individual precision of the latent variable scores.

Figure 4: Information functions for the latent variables.

Figure 5: Estimates for individual standard errors of measurement of the latent variable scores.

## List of Tables

Table 1: Participants: Anticipated and Actual Numbers

Table 2: Professions of participants

Table 3: Participant Demographic Information: age, employment status, nationality, gender and career stage (years since registration)

Table 4: Comparison of selected goodness-of-fit indices between the unidimensional model and the proposed model.

Table 5: Cronbach's alpha co-efficient for each construct

Table 6: The final selection of items with the dimension each one of them belongs, the loading estimates, the standard errors of the loading estimates, the ratios between the estimate and the standard error and the two-tailed  $p$ -values for the estimates.



1  
2  
3  
4  
5  
6  
7  
8  
9  
10  
11  
12  
13  
14  
15  
16  
17  
18  
19  
20  
21  
22  
23  
24  
25  
26  
27  
28  
29  
30  
31  
32  
33  
34  
35  
36  
37  
38  
39  
40  
41  
42  
43  
44  
45  
46  
47  
48  
49  
50  
51  
52  
53  
54  
55  
56  
57  
58  
59  
60

Scree Plot



Scree Plot

1  
2  
3  
4  
5  
6  
7  
8  
9  
10  
11  
12  
13  
14  
15  
16  
17  
18  
19  
20  
21  
22  
23  
24  
25  
26  
27  
28  
29  
30  
31  
32  
33  
34  
35  
36  
37  
38  
39  
40  
41  
42  
43  
44  
45  
46  
47  
48  
49  
50  
51  
52  
53  
54  
55  
56  
57  
58  
59  
60



Latent variables and loadings



Estimates for mean individual precision of the latent variable scores

1  
2  
3  
4  
5  
6  
7  
8  
9  
10  
11  
12  
13  
14  
15  
16  
17  
18  
19  
20  
21  
22  
23  
24  
25  
26  
27  
28  
29  
30  
31  
32  
33  
34  
35  
36  
37  
38  
39  
40  
41  
42  
43  
44  
45  
46  
47  
48  
49  
50  
51  
52  
53  
54  
55  
56  
57  
58  
59  
60



Information functions for the latent variables

1  
2  
3  
4  
5  
6  
7  
8  
9  
10  
11  
12  
13  
14  
15  
16  
17  
18  
19  
20  
21  
22  
23  
24  
25  
26  
27  
28  
29  
30  
31  
32  
33  
34  
35  
36  
37  
38  
39  
40  
41  
42  
43  
44  
45  
46  
47  
48  
49  
50  
51  
52  
53  
54  
55  
56  
57  
58  
59  
60

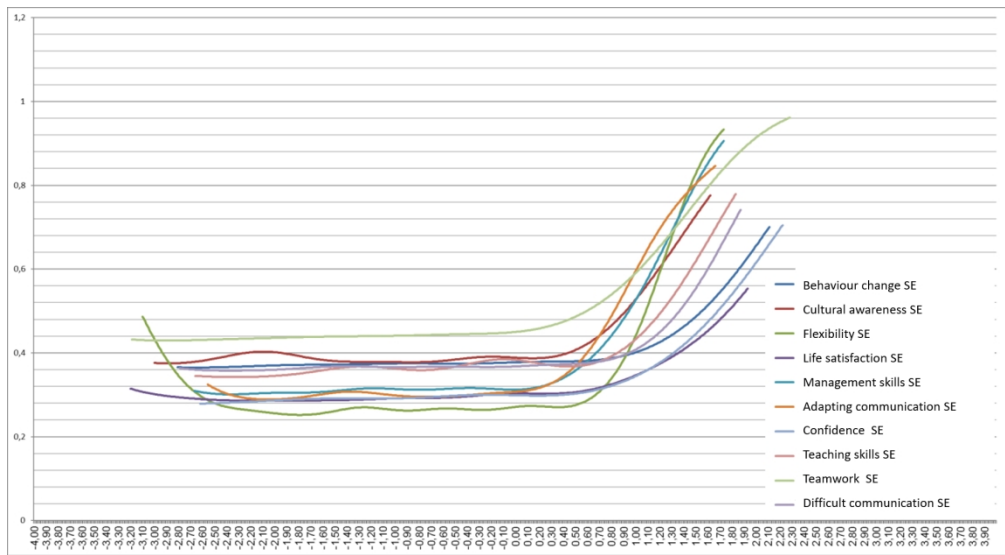

Estimates for individual standard errors of measurement of the latent variable scores

## **Additional Files: Tables**

### **Table 1: Each core outcome and how it was used in the tool**

| CORE OUTCOME                                                                                                                                                                                                                                                                    | INCLUDE/REMOVE/COMBINE | Reason/changed to/combined into                                                                                                |
|---------------------------------------------------------------------------------------------------------------------------------------------------------------------------------------------------------------------------------------------------------------------------------|------------------------|--------------------------------------------------------------------------------------------------------------------------------|
| INCREASED AWARENESS OF/KNOWLEDGE ABOUT CULTURAL DIFFERENCES AND SIMILARITIES (e.g., understanding key issues within a culture, culturally acceptable behaviour and cultures of UK immigrants, learning about, accepting and changing assumptions about other cultures)          | COMB                   | I have demonstrated a good awareness about how cultural differences influence health                                           |
| INCREASED AWARENESS OF/KNOWLEDGE ABOUT THE CULTURAL ASPECTS OF HEALTH (e.g., greater understanding of health promotion, how culture affects daily life and professional work, cultural differences in health, the effects of politics on health, sustainable healthcare)        | COMB                   | I have demonstrated a good awareness about how cultural differences influence health                                           |
| ABILITY TO WORK WITH LIMITED RESOURCES (e.g., being more resourceful, ability to target resources, ability to find solutions despite limited resources, making use of everything available, ability to work without reliance on technology, manage in a low resource setting)   | COMB                   | I have frequently had to find solutions despite limited resources                                                              |
| INCREASED AWARENESS OF/KNOWLEDGE ABOUT CULTURE IN PRACTICAL ASSESSMENTS (e.g., the importance of collecting relevant cultural information about people's presenting health problems and learning how to conduct cultural assessments and culturally based physical assessments) | INC                    |                                                                                                                                |
| ABILITY TO APPLY CLINICAL SKILLS TO ANOTHER CONTEXT (e.g., a more challenging environment or a low resource setting)                                                                                                                                                            | INC                    |                                                                                                                                |
| ABILITY TO BE ADAPTABLE AND INNOVATIVE IN TEACHING (e.g., ability to transfer skills and knowledge to the most influential people or to another context, recognising different learning styles, being adaptable in assessment)                                                  | INC                    |                                                                                                                                |
| INCREASED AWARENESS OF/KNOWLEDGE ABOUT HOW OTHER HEALTHCARE SYSTEMS FUNCTION (e.g., developed insight into disparities within healthcare systems, understanding of other systems)                                                                                               | INC                    |                                                                                                                                |
| ABILITY TO COPE (e.g., improved coping strategies, ability to deal with lack of structure, knock backs and stress, being unfazed by things and taking things in stride, new approach to guilt for patients problems)                                                            | INC                    |                                                                                                                                |
| INCREASED CULTURAL SENSITIVITY (e.g., sensitivity to reasoning behind cultural differences, feelings of minority and language barriers)                                                                                                                                         | COMB                   | I have frequently demonstrated cultural sensitivity (e.g. understanding that words and behaviours can have different meanings) |
| UNDERSTANDING THAT WORDS AND BEHAVIOURS CAN HAVE DIFFERENT MEANINGS (e.g., understanding how words are perceived by others, understanding how to speak and behave so as not offend people)                                                                                      | COMB                   | I have frequently demonstrated cultural sensitivity (e.g. understanding that words and behaviours can have different meanings) |

|                                                                                                                                                                                                                                                                                                                                                             |                                                                                                                                                                                                                                                                                                                                                                                                                                                                                                                                                                                                                                                                                                                                                                                                                                                                                                                                                                                                                                                                                                                                                                                                                                                                                                                                                                                                                                                                                                                                                                                                                                                                                                                                                                                                                                                                                                                                                                                                                                                                                                                                                                                                                                                                                                                                                                                                                                                                                                                                                                                                                                                                                                                     |                                                                                                                                                                                                                        |                                                                                                                                                                                                                                                                                                                                                                                                                                                                                                                                                                                                                                                                                                             |
|-------------------------------------------------------------------------------------------------------------------------------------------------------------------------------------------------------------------------------------------------------------------------------------------------------------------------------------------------------------|---------------------------------------------------------------------------------------------------------------------------------------------------------------------------------------------------------------------------------------------------------------------------------------------------------------------------------------------------------------------------------------------------------------------------------------------------------------------------------------------------------------------------------------------------------------------------------------------------------------------------------------------------------------------------------------------------------------------------------------------------------------------------------------------------------------------------------------------------------------------------------------------------------------------------------------------------------------------------------------------------------------------------------------------------------------------------------------------------------------------------------------------------------------------------------------------------------------------------------------------------------------------------------------------------------------------------------------------------------------------------------------------------------------------------------------------------------------------------------------------------------------------------------------------------------------------------------------------------------------------------------------------------------------------------------------------------------------------------------------------------------------------------------------------------------------------------------------------------------------------------------------------------------------------------------------------------------------------------------------------------------------------------------------------------------------------------------------------------------------------------------------------------------------------------------------------------------------------------------------------------------------------------------------------------------------------------------------------------------------------------------------------------------------------------------------------------------------------------------------------------------------------------------------------------------------------------------------------------------------------------------------------------------------------------------------------------------------------|------------------------------------------------------------------------------------------------------------------------------------------------------------------------------------------------------------------------|-------------------------------------------------------------------------------------------------------------------------------------------------------------------------------------------------------------------------------------------------------------------------------------------------------------------------------------------------------------------------------------------------------------------------------------------------------------------------------------------------------------------------------------------------------------------------------------------------------------------------------------------------------------------------------------------------------------|
| 1<br>2<br>3<br>4<br>5<br>6<br>7<br>8<br>9<br>10<br>11<br>12<br>13<br>14<br>15<br>16<br>17<br>18<br>19<br>20<br>21<br>22<br>23<br>24<br>25<br>26<br>27<br>28<br>29<br>30<br>31<br>32<br>33<br>34<br>35<br>36<br>37<br>38<br>39<br>40<br>41<br>42<br>43<br>44<br>45<br>46<br>47<br>48<br>49<br>50<br>51<br>52<br>53<br>54<br>55<br>56<br>57<br>58<br>59<br>60 | <p>ABILITY TO APPLY KNOWLEDGE ACROSS SYSTEMS (e.g., ability to apply knowledge from host system to UK and vice versa, using knowledge gained in system to improve/change another)</p> <p>DEVELOPMENT OF A NEW PERSPECTIVE (e.g., revising assumptions, seeing things differently, changed world views and outlook, look at everything in a new light, openness to new experiences, put things into perspective)</p> <p>IMPROVED FLEXIBILITY AND ADAPTABILITY (e.g., acceptance of other ways of working, adaptation to responsibility, being able to adapt more easily to unfamiliar situations, able to cope more easily with change, gaining a wider perspective, understanding the flexibility of roles)</p> <p>ABILITY TO BE INNOVATE WHEN OVERCOMING CHALLENGES (i.e., finding unique ways of overcoming cultural and language challenges)</p> <p>INCREASED RESPECT FOR OTHER CULTURES</p> <p>INCREASED UNDERSTANDING OF BASIC SKILLS AND IDEAS (i.e., back to basics, e.g., basic observations using eyes, less reliance on lab tests and technology, basic clinical skills and science)</p> <p>CONFIDENCE IN TEACHING ABILITY (e.g., being more comfortable around others, confidence public speaking, confidence in transferring knowledge)</p> <p>IMPROVED CONFIDENCE (e.g., in caring for clients from another culture, in quality improvement methods, to take bolder steps, to address challenging situations, self-confidence, confidence in professional ability,)</p> <p>CONFIDENCE TO WORK IN OTHER LOCATIONS (e.g., confidence to move to another city/country, working with UK multicultural/ underserved populations)</p> <p>INCREASED AWARENESS OF/KNOWLEDGE ABOUT GLOBAL ISSUES (e.g., re-evaluating world issues, shared purpose)</p> <p>INCREASED AWARENESS OF/KNOWLEDGE ABOUT CONDITIONS AND PROCEDURES RARELY ENCOUNTERED IN THE UK (e.g., greater understanding of procedures not used in the UK, unfamiliar equipment and delayed presentations, better management of conditions that are not common in the UK)</p> <p>INCREASED AWARENESS OF/KNOWLEDGE ABOUT TROPICAL DISEASES</p> <p>INCREASED AWARENESS OF/KNOWLEDGE ABOUT THE IMPORTANCE OF MUTUAL LEARNING AND RESPECT (i.e., greater understanding of reciprocal learning)</p> <p>ABILITY TO BE ADAPTABLE IN LEADING (e.g., able to lead in complex novel situations, ability to compromise not dictate)</p> <p>ABILITY TO WORK WITHIN A SYSTEM WITH UNFAMILIAR POWER DYNAMICS</p> <p>ABILITY TO ADAPT SOCIAL NORMS TO MEET NEEDS OF ANOTHER CULTURE (e.g., change behaviours to fit into another culture, being aware of own social norms and adapting them)</p> <p>ABILITY TO EXCHANGE IDEAS WITH THOSE FROM ANOTHER CULTURE</p> | <p>INC</p> <p>INC</p> <p>INC</p> <p>COMB</p> <p>COMB</p> <p>COMB</p> <p>COMB</p> <p>INC</p> <p>INC</p> <p>INC</p> <p>COMB</p> <p>COMB</p> <p>INC</p> <p>INC</p> <p>INC</p> <p>INC</p> <p>INC</p> <p>INC</p> <p>INC</p> | <p>I have frequently had to find solutions despite limited resources</p> <p>I have demonstrated a good awareness about how cultural differences influence health</p> <p>I have relied heavily on the basic skills of my profession (e.g. physical examination)</p> <p>In the last month I have demonstrated that I'm a good teacher</p> <p>I am confident in my ability to teach others</p> <p>I have a good knowledge of conditions and procedures rarely encountered in the UK (e.g. tropical diseases, delayed presentations, old equipment)</p> <p>I have a good knowledge of conditions and procedures rarely encountered in the UK (e.g. tropical diseases, delayed presentations, old equipment)</p> |
|-------------------------------------------------------------------------------------------------------------------------------------------------------------------------------------------------------------------------------------------------------------------------------------------------------------------------------------------------------------|---------------------------------------------------------------------------------------------------------------------------------------------------------------------------------------------------------------------------------------------------------------------------------------------------------------------------------------------------------------------------------------------------------------------------------------------------------------------------------------------------------------------------------------------------------------------------------------------------------------------------------------------------------------------------------------------------------------------------------------------------------------------------------------------------------------------------------------------------------------------------------------------------------------------------------------------------------------------------------------------------------------------------------------------------------------------------------------------------------------------------------------------------------------------------------------------------------------------------------------------------------------------------------------------------------------------------------------------------------------------------------------------------------------------------------------------------------------------------------------------------------------------------------------------------------------------------------------------------------------------------------------------------------------------------------------------------------------------------------------------------------------------------------------------------------------------------------------------------------------------------------------------------------------------------------------------------------------------------------------------------------------------------------------------------------------------------------------------------------------------------------------------------------------------------------------------------------------------------------------------------------------------------------------------------------------------------------------------------------------------------------------------------------------------------------------------------------------------------------------------------------------------------------------------------------------------------------------------------------------------------------------------------------------------------------------------------------------------|------------------------------------------------------------------------------------------------------------------------------------------------------------------------------------------------------------------------|-------------------------------------------------------------------------------------------------------------------------------------------------------------------------------------------------------------------------------------------------------------------------------------------------------------------------------------------------------------------------------------------------------------------------------------------------------------------------------------------------------------------------------------------------------------------------------------------------------------------------------------------------------------------------------------------------------------|

|    |                                                                                                                                                                                                                                                         |      |                                                                                                                   |
|----|---------------------------------------------------------------------------------------------------------------------------------------------------------------------------------------------------------------------------------------------------------|------|-------------------------------------------------------------------------------------------------------------------|
| 1  | INCREASED SELF-AWARENESS (e.g., understanding own skills and limitations, how to challenge own beliefs and importance of reflecting on own situation)                                                                                                   | INC  |                                                                                                                   |
| 2  |                                                                                                                                                                                                                                                         |      |                                                                                                                   |
| 3  |                                                                                                                                                                                                                                                         |      |                                                                                                                   |
| 4  | PATIENCE AND TOLERANCE (e.g., accepting and working at other peoples pace, more tolerant)                                                                                                                                                               | INC  |                                                                                                                   |
| 5  |                                                                                                                                                                                                                                                         |      |                                                                                                                   |
| 6  | PROACTIVITY (e.g., thinking on feet, using initiative, efficiency, get on with things rather than look for someone to blame)                                                                                                                            | INC  |                                                                                                                   |
| 7  |                                                                                                                                                                                                                                                         |      |                                                                                                                   |
| 8  | ABILITY TO WORK WITH RESOURCES AVAILABLE IN SPECIFIC CONTEXTS (i.e., understanding the reasons behind lack of resources)                                                                                                                                | COMB | I have frequently had to find solutions despite limited resources                                                 |
| 9  |                                                                                                                                                                                                                                                         |      |                                                                                                                   |
| 10 | ABILITY TO WORK TOWARDS SOLUTIONS (e.g., solution focused approach)                                                                                                                                                                                     | INC  |                                                                                                                   |
| 11 |                                                                                                                                                                                                                                                         |      |                                                                                                                   |
| 12 | UNDERSTANDING THAT SPEED AND LANGUAGE COMPETENCY AFFECT COMMUNICATION (e.g., awareness of how speed affects comprehension, understanding language differences and checking recipient comprehension, ability to use an interpreter)                      | INC  |                                                                                                                   |
| 13 |                                                                                                                                                                                                                                                         |      |                                                                                                                   |
| 14 | INCREASED AWARENESS OF/KNOWLEDGE ABOUT THE IMPORTANCE OF COMMUNITY PARTICIPATION IN HEALTH (e.g., understanding the community and social influences on health, the role of the community in health, public health and the importance of community work) | INC  |                                                                                                                   |
| 15 |                                                                                                                                                                                                                                                         |      |                                                                                                                   |
| 16 | ABILITY TO USE A BROADER RANGE OF CLINICAL SKILLS (e.g., enhancing existing skills and acquiring new clinical skills, greater all round competence)                                                                                                     | INC  |                                                                                                                   |
| 17 |                                                                                                                                                                                                                                                         |      |                                                                                                                   |
| 18 | UNDERSTANDING THAT CHANGING BEHAVIOUR IS COMPLEX (e.g., understanding how to make small changes and not to force your perspective onto others,)                                                                                                         | COMB | In my work I have demonstrated skills in changing patients' or colleagues' behaviours                             |
| 19 |                                                                                                                                                                                                                                                         |      |                                                                                                                   |
| 20 | ABILITY TO IMPROVE SERVICE (e.g., renewed enthusiasm for service improvement)                                                                                                                                                                           | INC  |                                                                                                                   |
| 21 |                                                                                                                                                                                                                                                         |      |                                                                                                                   |
| 22 | INCREASED STAFF KNOWLEDGE AND SKILLS (e.g., increased staff knowledge of low cost healthcare, more knowledgeable staff able to cover more areas, to discover better ways of doing things and more aware of waste reduction)                             | REM  | too vague and not based on individual                                                                             |
| 23 |                                                                                                                                                                                                                                                         |      |                                                                                                                   |
| 24 | INCREASED AWARENESS OF/KNOWLEDGE ABOUT HOW CONTEXT AFFECTS COMMUNICATION (e.g., effectively conveying ideas in a contextually appropriate way)                                                                                                          | INC  |                                                                                                                   |
| 25 |                                                                                                                                                                                                                                                         |      |                                                                                                                   |
| 26 | INCREASED AWARENESS OF/KNOWLEDGE ABOUT THE NEED FOR AND IMPORTANCE OF TRAINING (i.e., understanding how important effective training is in)                                                                                                             | INC  |                                                                                                                   |
| 27 |                                                                                                                                                                                                                                                         |      |                                                                                                                   |
| 28 | IMPROVEMENT IN TEACHING SKILLS (e.g., learning new techniques, greater training delivery skills, lecturing skills and small group teaching skills)                                                                                                      | COMB | In the last month I have demonstrated that I'm a good teacher<br><br>I am confident in my ability to teach others |
| 29 |                                                                                                                                                                                                                                                         |      |                                                                                                                   |
| 30 | ABILITY TO DEAL WITH THE UNEXPECTED                                                                                                                                                                                                                     | INC  |                                                                                                                   |
| 31 |                                                                                                                                                                                                                                                         |      |                                                                                                                   |
| 32 | ABILITY TO MANAGE PROJECTS                                                                                                                                                                                                                              | INC  |                                                                                                                   |
| 33 |                                                                                                                                                                                                                                                         |      |                                                                                                                   |
| 34 | DEEPER ENGAGEMENT WITH ISSUES OF EQUALITY AND DIVERSITY                                                                                                                                                                                                 | INC  |                                                                                                                   |
| 35 |                                                                                                                                                                                                                                                         |      |                                                                                                                   |
| 36 | ABILITY TO OVERCOME COMMUNICATION CHALLENGES (e.g., ability to communicate effectively in high pressure situations, engage in challenging conversations and liaise between groups)                                                                      | INC  |                                                                                                                   |
| 37 |                                                                                                                                                                                                                                                         |      |                                                                                                                   |
| 38 | ABILITY TO BE INNOVATIVE WITH CLINICAL SKILLS (e.g., use of innovative techniques, finding new ways to approach a condition, new ways of working)                                                                                                       | INC  |                                                                                                                   |
| 39 |                                                                                                                                                                                                                                                         |      |                                                                                                                   |
| 40 |                                                                                                                                                                                                                                                         |      |                                                                                                                   |
| 41 |                                                                                                                                                                                                                                                         |      |                                                                                                                   |
| 42 |                                                                                                                                                                                                                                                         |      |                                                                                                                   |
| 43 |                                                                                                                                                                                                                                                         |      |                                                                                                                   |
| 44 |                                                                                                                                                                                                                                                         |      |                                                                                                                   |
| 45 |                                                                                                                                                                                                                                                         |      |                                                                                                                   |
| 46 |                                                                                                                                                                                                                                                         |      |                                                                                                                   |
| 47 |                                                                                                                                                                                                                                                         |      |                                                                                                                   |
| 48 |                                                                                                                                                                                                                                                         |      |                                                                                                                   |
| 49 |                                                                                                                                                                                                                                                         |      |                                                                                                                   |
| 50 |                                                                                                                                                                                                                                                         |      |                                                                                                                   |
| 51 |                                                                                                                                                                                                                                                         |      |                                                                                                                   |
| 52 |                                                                                                                                                                                                                                                         |      |                                                                                                                   |
| 53 |                                                                                                                                                                                                                                                         |      |                                                                                                                   |
| 54 |                                                                                                                                                                                                                                                         |      |                                                                                                                   |
| 55 |                                                                                                                                                                                                                                                         |      |                                                                                                                   |
| 56 |                                                                                                                                                                                                                                                         |      |                                                                                                                   |
| 57 |                                                                                                                                                                                                                                                         |      |                                                                                                                   |
| 58 |                                                                                                                                                                                                                                                         |      |                                                                                                                   |
| 59 |                                                                                                                                                                                                                                                         |      |                                                                                                                   |
| 60 |                                                                                                                                                                                                                                                         |      |                                                                                                                   |



|    |                                                                                                                                                                                                                             |      |                                                                                 |
|----|-----------------------------------------------------------------------------------------------------------------------------------------------------------------------------------------------------------------------------|------|---------------------------------------------------------------------------------|
| 1  | APPRECIATION OF HAVING THE RIGHT TOOLS AND EQUIPMENT TO BE ABLE TO DO THE JOB (i.e., resources: technical equipment, disposal equipment, cleaning products and protective equipment)                                        | COMB | I have frequently had to find solutions despite limited resources               |
| 2  |                                                                                                                                                                                                                             |      |                                                                                 |
| 3  | APPRECIATION OF EXCELLENT HUMAN RESOURCE IN THE NHS (e.g., multidisciplinary TEAM WORKs, HR structures, appreciation of own profession, understanding hierarchy and the importance of each person within it)                | INC  |                                                                                 |
| 4  |                                                                                                                                                                                                                             |      |                                                                                 |
| 5  | IMPROVED EMOTIONAL INTELLIGENCE (e.g., changed engagement with self, knowledge and world)                                                                                                                                   | INC  |                                                                                 |
| 6  |                                                                                                                                                                                                                             |      |                                                                                 |
| 7  | ABILITY TO IDENTIFY AND ANTICIPATE POTENTIAL PROBLEMS (e.g., identify problems when setting up a new project)                                                                                                               | INC  |                                                                                 |
| 8  |                                                                                                                                                                                                                             |      |                                                                                 |
| 9  | INCREASED AWARENESS OF/KNOWLEDGE ABOUT APPROPRIATE CLINICAL BEHAVIOUR (e.g., knowing when to stop and when to move forward, when to ask for help and different populations needs)                                           | INC  |                                                                                 |
| 10 |                                                                                                                                                                                                                             |      |                                                                                 |
| 11 | ABILITY TO MAKE INDEPENDENT CLINICAL DECISIONS (e.g., ability to make an urgent decision in an emergency, dealing with uncertain outcomes, evaluating risks to patients and self)                                           | COMB | I am confident in my ability to make appropriate independent clinical decisions |
| 12 |                                                                                                                                                                                                                             |      |                                                                                 |
| 13 | UNDERSTANDING OWN POTENTIAL TO EMPOWER PEOPLE                                                                                                                                                                               | INC  |                                                                                 |
| 14 |                                                                                                                                                                                                                             |      |                                                                                 |
| 15 | ABILITY TO WORK AS PART OF A TEAM WORK (e.g., understanding TEAM WORK group norms, perception of roles within the group, managing personal objectives within a group)                                                       | INC  |                                                                                 |
| 16 |                                                                                                                                                                                                                             |      |                                                                                 |
| 17 | ABILITY TO BUILD A GLOBAL NETWORK                                                                                                                                                                                           | INC  |                                                                                 |
| 18 |                                                                                                                                                                                                                             |      |                                                                                 |
| 19 | ABILITY TO DISSEMINATION BEST PRACTICE GLOBALLY                                                                                                                                                                             | INC  |                                                                                 |
| 20 |                                                                                                                                                                                                                             |      |                                                                                 |
| 21 | APPRECIATION OF FREE UNIVERSAL HEALTH (e.g., the NHS system of free healthcare for all, privilege and opportunity, the expectations that are placed on NHS by service users)                                                | INC  |                                                                                 |
| 22 |                                                                                                                                                                                                                             |      |                                                                                 |
| 23 | IMPROVED SITUATIONAL AWARENESS (i.e., understanding your environment so you can understand what to do)                                                                                                                      | REM  | Research suggests self-report does not measure this effectively                 |
| 24 |                                                                                                                                                                                                                             |      |                                                                                 |
| 25 | INCREASED JOB SATISFACTION (e.g., increased motivation and morale within profession, renewed passion for work, sense of reward)                                                                                             | INC  |                                                                                 |
| 26 |                                                                                                                                                                                                                             |      |                                                                                 |
| 27 | PERSONAL SATISFACTION (e.g., personal achievements and challenges, new experiences, experiencing a different lifestyle, a holiday, appreciation of own life, personal fulfilment)                                           | INC  |                                                                                 |
| 28 |                                                                                                                                                                                                                             |      |                                                                                 |
| 29 | CAN-DO ATTITUDE                                                                                                                                                                                                             | INC  |                                                                                 |
| 30 |                                                                                                                                                                                                                             |      |                                                                                 |
| 31 | ABILITY TO PROVIDE BETTER CARE (e.g., ability to integrate primary and secondary care, to provide multicultural care, to develop most effective approaches to care and taking responsibility for providing quality of care) | INC  |                                                                                 |
| 32 |                                                                                                                                                                                                                             |      |                                                                                 |
| 33 | ABILITY TO CO-OPERATE (e.g., willingness to see another point of view)                                                                                                                                                      | INC  |                                                                                 |
| 34 |                                                                                                                                                                                                                             |      |                                                                                 |
| 35 | APPRECIATION OF CLINICAL GOVERNANCE PROCEDURES WITHIN NHS (e.g., waste disposal, audit, TEAM WORKwork, education system, tests and investigations)                                                                          | COMB | I have thought about and appreciated clinical governance                        |
| 36 |                                                                                                                                                                                                                             |      |                                                                                 |
| 37 | APPRECIATION OF THE IMPORTANCE OF CARE AND COMPASSION (e.g., ability to compare compassion in both systems, empathy and fairness)                                                                                           | INC  |                                                                                 |
| 38 |                                                                                                                                                                                                                             |      |                                                                                 |
| 39 | INCREASED AWARENESS OF/KNOWLEDGE ABOUT THE POSITIVE IMPACT OF CLINICAL POLICIES AND GOVERNANCE (e.g., understanding the benefits of a comprehensive checklist)                                                              | COMB | I have thought about and appreciated clinical governance                        |
| 40 |                                                                                                                                                                                                                             |      |                                                                                 |
| 41 | INCREASED AWARENESS OF/KNOWLEDGE ABOUT ETHICS (i.e., experiencing ethical dilemmas, understanding the importance of ethics)                                                                                                 | COMB | I have frequently experienced ethical dilemmas                                  |
| 42 |                                                                                                                                                                                                                             |      |                                                                                 |
| 43 |                                                                                                                                                                                                                             |      |                                                                                 |
| 44 |                                                                                                                                                                                                                             |      |                                                                                 |
| 45 |                                                                                                                                                                                                                             |      |                                                                                 |
| 46 |                                                                                                                                                                                                                             |      |                                                                                 |
| 47 |                                                                                                                                                                                                                             |      |                                                                                 |
| 48 |                                                                                                                                                                                                                             |      |                                                                                 |
| 49 |                                                                                                                                                                                                                             |      |                                                                                 |
| 50 |                                                                                                                                                                                                                             |      |                                                                                 |
| 51 |                                                                                                                                                                                                                             |      |                                                                                 |
| 52 |                                                                                                                                                                                                                             |      |                                                                                 |
| 53 |                                                                                                                                                                                                                             |      |                                                                                 |
| 54 |                                                                                                                                                                                                                             |      |                                                                                 |
| 55 |                                                                                                                                                                                                                             |      |                                                                                 |
| 56 |                                                                                                                                                                                                                             |      |                                                                                 |
| 57 |                                                                                                                                                                                                                             |      |                                                                                 |
| 58 |                                                                                                                                                                                                                             |      |                                                                                 |
| 59 |                                                                                                                                                                                                                             |      |                                                                                 |
| 60 |                                                                                                                                                                                                                             |      |                                                                                 |

|    |                                                                                                                                                                                                                                                                                                          |      |                                                                                        |
|----|----------------------------------------------------------------------------------------------------------------------------------------------------------------------------------------------------------------------------------------------------------------------------------------------------------|------|----------------------------------------------------------------------------------------|
| 1  | CHANGED PERCEPTION OF OTHERNESS (e.g., understanding importance of being a friendly stranger in UK, feeling like a foreigner)                                                                                                                                                                            | INC  |                                                                                        |
| 2  | INTEGRITY                                                                                                                                                                                                                                                                                                | REM  | Too vague                                                                              |
| 3  | INDEPENDENCE (e.g., lone working)                                                                                                                                                                                                                                                                        | INC  |                                                                                        |
| 4  | ABILITY TO PLAN AND ORGANISE (e.g., ability to set direction, improved audit skills)                                                                                                                                                                                                                     | INC  |                                                                                        |
| 5  | ABILITY TO MAKE DECISIONS (e.g., understanding who the decision is for, taking action on decision, making judgements)                                                                                                                                                                                    | COMB | I am confident in my ability to make appropriate independent clinical decisions        |
| 6  | ABILITY TO MANAGE RISK (e.g., manage risk in advance, evaluation of environment, understanding the clinical importance of risk management and the wider implication of poorly managed risk)                                                                                                              | INC  |                                                                                        |
| 7  | INCREASED PATIENT SATISFACTION (e.g., staff better able to respond to UK multicultural populations, staff able to compare how systems affect patient satisfaction, have greater relationships with multicultural population, more in tune with patients and more aware of individual needs of patients). | REM  | Cannot be measured in professional self-reports alone                                  |
| 8  | ABILITY TO COMMUNICATE NON-VERBALLY                                                                                                                                                                                                                                                                      | INC  |                                                                                        |
| 9  | ABILITY TO ESTABLISH COMMUNICATION SYSTEMS (e.g., formal and informal)                                                                                                                                                                                                                                   | INC  |                                                                                        |
| 10 | INCREASED CLINICAL KNOWLEDGE IN RELATION TO OTHER PROFESSIONS (e.g., doctors understanding nurses and vice versa, multi-disciplinary awareness)                                                                                                                                                          | INC  |                                                                                        |
| 11 | ABILITY TO GET THE MOST OUT OF PEOPLE (e.g., encouraging people to work together, recognise their own strengths and to take possession of their own work/projects, ability to assess the capability of others)                                                                                           | INC  |                                                                                        |
| 12 | ABILITY TO MANAGE PEOPLE (e.g., able to allocate tasks and co-ordinate people, to deal with people with differing objectives, to negotiate with multiple stakeholders, to manage difficult people)                                                                                                       | COMB | Colleagues have noticed my abilities to manage difficult people                        |
| 13 | ABILITY TO DEVELOP FRIENDSHIPS (e.g., relationship formation skills, developing new friendships)                                                                                                                                                                                                         | INC  |                                                                                        |
| 14 | ABILITY TO MANAGE SELF (e.g., own expectations, self-reliance, self-management, self-assurance, reflexivity)                                                                                                                                                                                             | INC  |                                                                                        |
| 15 | CHANGED JUDGEMENT (e.g., non-judgemental attitude, changed self-judgement)                                                                                                                                                                                                                               | INC  |                                                                                        |
| 16 | DIPLOMACY                                                                                                                                                                                                                                                                                                | REM  | Too vague                                                                              |
| 17 | ABILITY TO FIND FACTS TO SOLVE PROBLEMS                                                                                                                                                                                                                                                                  | INC  |                                                                                        |
| 18 | DEVELOPING REDUNDANT OR BAD SKILLS/ATTITUDES (e.g., developing non-transferable skills, bad habits, deskilling, returning with overconfidence in own ability, poorer communication skills, loss of confidence)                                                                                           | INC  |                                                                                        |
| 19 | FINANCIAL LOSS (e.g., costs of getting involved, loss of earnings, pension or employment entitlement)                                                                                                                                                                                                    | REM  | Too contextual- add to variables                                                       |
| 20 | REDUCTION IN NHS DROP OUTS (e.g., increased staff retention, when they volunteer and come back to NHS)                                                                                                                                                                                                   | REM  | Cannot be measured in professional self-reports alone                                  |
| 21 | ABILITY TO OBSERVE AND EXAMINE PATIENTS (e.g., increased intuitive knowledge of clinical signs and clinical judgement ability to make diagnosis without investigations)                                                                                                                                  | COMB | I have relied heavily on the basic skills of my profession (e.g. physical examination) |
| 22 | ABILITY TO WORK IN A PROFESSIONALLY COMPETENT WAY (e.g., having wider view of profession, intellectual development, reminder of professional responsibilities, stronger work ethic)                                                                                                                      | REM  | Too vague                                                                              |
| 23 | INCREASED UNDERSTANDING OF HOW TO BE A GOOD TEACHER (e.g., allowing students to learn from mistakes, ability to suggest and acknowledge improvements in teaching,                                                                                                                                        | COMB | In the last month I have demonstrated that I'm a good teacher                          |

|    |                                                                                                                                        |      |                                                                                                                                         |
|----|----------------------------------------------------------------------------------------------------------------------------------------|------|-----------------------------------------------------------------------------------------------------------------------------------------|
| 1  | understanding how communication affects learning, how to target training most effectively and the importance of experiential learning) |      | I am confident in my ability to teach others                                                                                            |
| 2  | 3                                                                                                                                      |      |                                                                                                                                         |
| 4  | 4                                                                                                                                      |      |                                                                                                                                         |
| 5  | 5                                                                                                                                      |      |                                                                                                                                         |
| 6  | 6                                                                                                                                      | INC  |                                                                                                                                         |
| 7  | 7                                                                                                                                      |      |                                                                                                                                         |
| 8  | 8                                                                                                                                      | REM  | Went into variables                                                                                                                     |
| 9  | 9                                                                                                                                      |      |                                                                                                                                         |
| 10 | 10                                                                                                                                     |      |                                                                                                                                         |
| 11 | 11                                                                                                                                     | CHAN | In my ability to manage myself and prioritise (e.g. time management, managing emotions, responding an emergency, prioritising workload) |
| 12 | 12                                                                                                                                     | G    |                                                                                                                                         |
| 13 | 13                                                                                                                                     |      |                                                                                                                                         |
| 14 | 14                                                                                                                                     |      |                                                                                                                                         |
| 15 | 15                                                                                                                                     |      |                                                                                                                                         |
| 16 | 16                                                                                                                                     | COMB | In my work I have demonstrated skills in changing patients' or colleagues' behaviours                                                   |
| 17 | 17                                                                                                                                     |      |                                                                                                                                         |
| 18 | 18                                                                                                                                     |      |                                                                                                                                         |
| 19 | 19                                                                                                                                     |      |                                                                                                                                         |
| 20 | 20                                                                                                                                     | INC  |                                                                                                                                         |
| 21 | 21                                                                                                                                     |      |                                                                                                                                         |
| 22 | 22                                                                                                                                     | COMB | I have frequently experienced ethical dilemmas                                                                                          |
| 23 | 23                                                                                                                                     |      |                                                                                                                                         |
| 24 | 24                                                                                                                                     | REM  | Cannot be measured in professional self-reports alone                                                                                   |
| 25 | 25                                                                                                                                     |      |                                                                                                                                         |
| 26 | 26                                                                                                                                     | REM  | Put into variables                                                                                                                      |
| 27 | 27                                                                                                                                     |      |                                                                                                                                         |
| 28 | 28                                                                                                                                     | REM  | Cannot be measured in professional self-reports alone                                                                                   |
| 29 | 29                                                                                                                                     |      |                                                                                                                                         |
| 30 | 30                                                                                                                                     | REM  | Cannot be measured in professional self-reports alone                                                                                   |
| 31 | 31                                                                                                                                     |      |                                                                                                                                         |
| 32 | 32                                                                                                                                     | INC  |                                                                                                                                         |
| 33 | 33                                                                                                                                     |      |                                                                                                                                         |
| 34 | 34                                                                                                                                     | INC  |                                                                                                                                         |
| 35 | 35                                                                                                                                     |      |                                                                                                                                         |
| 36 | 36                                                                                                                                     | INC  |                                                                                                                                         |
| 37 | 37                                                                                                                                     |      |                                                                                                                                         |
| 38 | 38                                                                                                                                     | INC  |                                                                                                                                         |
| 39 | 39                                                                                                                                     |      |                                                                                                                                         |
| 40 | 40                                                                                                                                     | INC  |                                                                                                                                         |
| 41 | 41                                                                                                                                     |      |                                                                                                                                         |
| 42 | 42                                                                                                                                     | INC  |                                                                                                                                         |
| 43 | 43                                                                                                                                     |      |                                                                                                                                         |
| 44 | 44                                                                                                                                     | COMB | Colleagues have noticed my abilities to manage difficult people                                                                         |
| 45 | 45                                                                                                                                     |      |                                                                                                                                         |
| 46 | 46                                                                                                                                     | INC  |                                                                                                                                         |
| 47 | 47                                                                                                                                     |      |                                                                                                                                         |
| 48 | 48                                                                                                                                     | INC  |                                                                                                                                         |
| 49 | 49                                                                                                                                     |      |                                                                                                                                         |
| 50 | 50                                                                                                                                     | INC  |                                                                                                                                         |
| 51 | 51                                                                                                                                     |      |                                                                                                                                         |
| 52 | 52                                                                                                                                     | INC  |                                                                                                                                         |
| 53 | 53                                                                                                                                     |      |                                                                                                                                         |
| 54 | 54                                                                                                                                     | INC  |                                                                                                                                         |
| 55 | 55                                                                                                                                     |      |                                                                                                                                         |
| 56 | 56                                                                                                                                     | INC  |                                                                                                                                         |
| 57 | 57                                                                                                                                     |      |                                                                                                                                         |
| 58 | 58                                                                                                                                     | INC  |                                                                                                                                         |
| 59 | 59                                                                                                                                     | INC  |                                                                                                                                         |
| 60 |                                                                                                                                        |      |                                                                                                                                         |

|                                                                                                                                       |     |                                                       |
|---------------------------------------------------------------------------------------------------------------------------------------|-----|-------------------------------------------------------|
| ABILITY TO ENGAGE SENIOR PEOPLE                                                                                                       | INC |                                                       |
| HEALTH CONSEQUENCES (e.g., animal bites, tropical diseases, STDs, injuries and transport accidents, infection, jet lag, skin disease) | REM | Went into variables                                   |
| EXTREME NATIONALISM TOWARDS UK                                                                                                        | INC |                                                       |
| LOSS OF INTEREST IN PROFESSION (e.g., not wanting to work in your profession when home)                                               | INC |                                                       |
| NHS BECOMES A MORE ATTRACTIVE EMPLOYER (e.g., an employer that offers staff the opportunity to volunteer)                             | REM | Cannot be measured in professional self-reports alone |
| INCREASED WORKFORCE PRODUCTIVITY                                                                                                      | REM | Cannot be measured in professional self-reports alone |

**Table 2: Construct used to frame statement**

| Statement                                                                                                | Area of Interest         |
|----------------------------------------------------------------------------------------------------------|--------------------------|
| awareness about how cultural differences influence health                                                | Experience               |
| ability to find solutions despite limited resources                                                      | Confidence               |
| find solutions despite limited resources                                                                 | Experience<br>Confidence |
| conscious of culture when working with patients (e.g. the importance of collecting cultural information) | Attitudes                |
| ability to apply clinical skills to another context                                                      | Confidence               |
| teach clinical colleagues                                                                                | Experience               |
| adapt the way I teach to make it more valuable                                                           | Experience               |
| knowledge about how healthcare systems outside of the UK function                                        | Attitudes                |
| ability to cope in work (e.g. ability to deal with stress)                                               | Experience               |
| cultural sensitivity (e.g. understanding that words and behaviours can have different meanings)          | Experience               |
| apply my clinical knowledge in any health system                                                         | Confidence               |
| developed a new perspective (e.g. changed my outlook)                                                    | Experience               |
| ability to adapt and be flexible in work                                                                 | Confidence<br>Experience |
| thinking about basic sciences (e.g. physiology, cell biological, biochemistry)                           | Experience               |
| relied basic skills profession (e.g. physical examination)                                               | Experience               |
| rely more on laboratory tests than physical examination                                                  | Attitudes                |
| confident in workplace                                                                                   | Confidence               |
| confident to work in another country                                                                     | Confidence               |
| knowledge about global issues                                                                            | Attitudes                |

|                                                                                                                                    |                          |
|------------------------------------------------------------------------------------------------------------------------------------|--------------------------|
| knowledge of conditions and procedures rarely encountered in the UK (e.g. tropical diseases, delayed presentations, old equipment) | Attitudes                |
| ability to work within an unfamiliar power dynamic                                                                                 | Confidence               |
| adapting my social norms to meet the needs of another culture                                                                      | Experience               |
| leader in work                                                                                                                     | Experience               |
| my abilities to be adaptable and innovative as a leader                                                                            | Confidence               |
| thought about my own skills, limitations and beliefs                                                                               | Experience               |
| patient and tolerant                                                                                                               | Experience               |
| proactive at work (e.g. used my initiative, got on with things, thought on feet)                                                   | Experience               |
| someone who focuses on solutions not problems                                                                                      | Attitudes                |
| changed the way I speak so that somebody can understand me                                                                         | Experience               |
| community participation is crucial for the health of the individual                                                                | Attitudes                |
| clinical skills that I have hardly ever used before                                                                                | Experience               |
| difficult to change someone else's behaviour                                                                                       | Attitudes                |
| skills in changing patients' or colleagues' behaviours                                                                             | Experience               |
| improved the healthcare service I work in                                                                                          | Experience               |
| changed the way I communicate to make it more contextually appropriate                                                             | Experience               |
| good teacher                                                                                                                       | Experience               |
| ability to deal with the unexpected                                                                                                | ConfidenceExperience     |
| ability to manage projects                                                                                                         | Confidence<br>Experience |
| deeply engaged with issues and equality and diversity                                                                              | Attitudes                |
| highly skilled in challenging conversations and effective communication, even in high pressure situations                          | Experience               |
| glad that I have access to the right tools and equipment to do my job                                                              | Experience               |
| thought about and appreciated the excellent TEAM WORKs, structures and individuals I work with in the NHS                          | Experience               |
| good understanding of my own thoughts, feelings and behaviours                                                                     | Attitudes                |
| I am good at anticipating future problems                                                                                          | Experience               |
| ability to make appropriate independent clinical decisions                                                                         | Confidence               |
| ability to empower others to help themselves                                                                                       | Attitudes                |
| good at working as part of TEAM WORK                                                                                               | Experience               |



|    |                                                            |            |
|----|------------------------------------------------------------|------------|
| 1  |                                                            |            |
| 2  |                                                            |            |
| 3  | professional network that includes people from all over    | Attitudes  |
| 4  | the world                                                  |            |
| 5  | confident in my ability to disseminate UK best clinical    | Confidence |
| 6  | practice globally                                          |            |
| 7  | thought about and appreciated free universal health        | Experience |
| 8  |                                                            |            |
| 9  | gone about my daily work in a fairly automatic way         | Experience |
| 10 |                                                            |            |
| 11 | satisfied in job                                           | Attitudes  |
| 12 |                                                            |            |
| 13 | satisfied in personal life                                 | Attitudes  |
| 14 | 'can-do' attitude                                          | Experience |
| 15 |                                                            |            |
| 16 | provide excellent, high quality care                       | Experience |
| 17 |                                                            |            |
| 18 | willingness to see someone else's point of view            | Experience |
| 19 | thought about and appreciated clinical governance          | Experience |
| 20 | thought about and appreciated the importance of care       | Experience |
| 21 | and compassion                                             |            |
| 22 | experienced ethical dilemmas                               | Experience |
| 23 |                                                            |            |
| 24 | appropriately manage ethical dilemmas                      | Confidence |
| 25 | experiences of feeling like an outsider                    | Attitudes  |
| 26 |                                                            |            |
| 27 | abilities to work independently when necessary             | Confident  |
| 28 |                                                            |            |
| 29 | abilities in planning and organisation                     | Experience |
| 30 | actively manage risk, including anticipating risk and      | Experience |
| 31 | evaluating my environment                                  |            |
| 32 | to rely on my non-verbal communication                     | Experience |
| 33 | establish communication systems (formal or informal)       | Experience |
| 34 |                                                            |            |
| 35 | understanding of the roles and responsibilities of all the | Attitudes  |
| 36 | professional staff I work with                             |            |
| 37 | capable of 'getting the most out of people' e.g.,          | Attitudes  |
| 38 | encouraging them and empowering them                       |            |
| 39 | managed difficult people                                   | Experience |
| 40 |                                                            | Confidence |
| 41 |                                                            |            |
| 42 | allocated tasks and co-ordinated colleagues                | Experience |
| 43 |                                                            | Confidence |
| 44 |                                                            |            |
| 45 | developing friendships and social relationships            | Attitudes  |
| 46 |                                                            |            |
| 47 | ability to manage myself, including self-reliance and      | Confidence |
| 48 | reflexivity                                                |            |
| 49 | quick to judge other people                                | Attitudes  |
| 50 |                                                            |            |
| 51 | developed bad habits in work                               | Experience |
| 52 |                                                            |            |
| 53 | lost some confidence in my clinical practice               | Experience |
| 54 | work ethic                                                 | Attitudes  |
| 55 |                                                            |            |
| 56 | act as a good role model at work                           | Attitudes  |
| 57 |                                                            |            |
| 58 |                                                            |            |
| 59 |                                                            |            |
| 60 |                                                            |            |

|                                                                                                     |                          |
|-----------------------------------------------------------------------------------------------------|--------------------------|
| manage situations that I consider to be a tragedy                                                   | Experience<br>Confidence |
| ability to explain complex ideas to others                                                          | Experience               |
| trust between colleagues is crucial in healthcare systems                                           | Attitudes                |
| good understanding of organisations e.g., identifying change agents and understanding who has power | Attitudes                |
| work has made me feel refreshed and reinvigorated                                                   | Experience               |
| consciously make an effort to get on with colleagues e.g. learning everybody's name                 | Attitudes                |
| aware of the financial costs of healthcare                                                          | Experience               |
| persistent in the face of failure                                                                   | Attitudes                |
| accept failure as a part of learning                                                                | Attitudes                |
| direct and positive communication with senior people in the organisation I have been working in     | Experience               |
| the UK is the best country in the world                                                             | Attitudes                |

**Table 3: Variables from systematic review and when they were presented t**

| <b><u>Variable</u></b>                                   | <b><u>Presented</u></b> |
|----------------------------------------------------------|-------------------------|
| Type of project (Charity, profit making, non-for-profit) | To project manager      |
| Professionals involved in project                        | To project manager      |
| Volunteer recruitment                                    | To project manager      |
| Continuity of visits                                     | To project manager      |
| Number of British professionals in country at each time  | To project manager      |
| Logistical organisation                                  | To project manager      |
| Project funding                                          | To project manager      |
| Volunteer/British Professional funding                   | To project manager      |
| Local funding                                            | To project manager      |
| Volunteer activities                                     | To project manager      |
| Organisational support                                   | To project manager      |
| Preparation                                              | To project manager      |
| Learning objectives                                      | To project manager      |
| Evaluation and reflection                                | To project manager      |
| Risk Assessments                                         | To project manager      |

|                                                                      |                              |
|----------------------------------------------------------------------|------------------------------|
| Local needs assessment                                               | To project manager           |
| Who is involved in development of aims, focus, structure of project  | To project manager           |
| Relationships with receiving organisation                            | To project manager           |
| Importance of sustainability, capacity building and service delivery | To project manager           |
| Project name, company and location                                   | Pre-placement questionnaire  |
| Employment immediately before trip                                   | Pre-placement questionnaire  |
| Use of annual leave                                                  | Pre-placement questionnaire  |
| Motivation                                                           | Pre-placement questionnaire  |
| Support                                                              | Pre-placement questionnaire  |
| Comfort working outside of competence or in a high situation         | Pre-placement questionnaire  |
| Expectations of impact                                               | Pre-placement questionnaire  |
| Professional knowledge                                               | Pre-placement questionnaire  |
| Length of stay                                                       | Post-placement questionnaire |
| Project engagement                                                   | Post-placement questionnaire |
| Learning host language                                               | Post-placement questionnaire |
| Utilisation of skills                                                | Post-placement questionnaire |
| Number of Interactions with patients                                 | Post-placement questionnaire |
| Conditions experienced                                               | Post-placement questionnaire |
| Understanding of local context                                       | Post-placement questionnaire |
| Similarities to UK                                                   | Post-placement questionnaire |
| Transferability of skills to UK                                      | Post-placement questionnaire |
| Opportunities                                                        | Post-placement questionnaire |
| Local staff                                                          | Post-placement questionnaire |



|                                                |                              |
|------------------------------------------------|------------------------------|
| Negative consequences                          | Post-placement questionnaire |
| Cost of placement                              | Post-placement questionnaire |
| Reflection                                     | Post-placement questionnaire |
| Contact with loved ones                        | Post-placement questionnaire |
| Support                                        | Post-placement questionnaire |
| Number of projects in facility                 | Post-placement questionnaire |
| General experience                             | Post-placement questionnaire |
| Ability to cope with NHS paperwork upon return | Post-placement questionnaire |
| Less interest in profession upon return        | Post-placement questionnaire |
| Desire to leave NHS/UK upon return             | Post-placement questionnaire |
| Recognition/Accreditation upon return          | Post-placement questionnaire |
| Employment status upon return                  | Post-placement questionnaire |
| Returner schemes upon return                   | Post-placement questionnaire |
| Influence on career path upon return           | Post-placement questionnaire |

## **Table 4 : results of cognitive interviews**

| <b>Statement</b>                                           | <b>Comment</b>                                                                      | <b>Action taken (or reason not )</b>                                                                                          |
|------------------------------------------------------------|-------------------------------------------------------------------------------------|-------------------------------------------------------------------------------------------------------------------------------|
| Frequently/constantly                                      | interchangable                                                                      | Decision was made on purpose                                                                                                  |
| I exchanged ideas with colleagues from a different culture | Red herring- exchanged                                                              | Choose Exchanged, as communicated could mean asking what time the bus arrives, want this to represent meaningful conversation |
| I feel I've developed a new perspective                    | Doesn't really make sense pre-placement, need to use more examples to contextualise | Participant used, having some kind of revelation, include this as an example                                                  |
| I anticipated future problems                              | ... and took necessary action                                                       | Decided to take participants advice here, and add took necessary action as anticipating them alone is not enough              |
| Skills, limitations and beliefs                            | too much for one sentence                                                           | remove beliefs                                                                                                                |
| I provided excellent high quality care                     | Excellent and high quality are the same remove excellent                            | Remove excellent                                                                                                              |

|                                                                                                                                                                                                                                                                                                                                                             |                                                                                                                                                                                                                                                                                                                                                                                                                                                                                                                                                                                                                                                                                                                                                                                                                                                                                                                                                                                                                                                                                                                                                                                                                                                                                                                                     |                                                                                                                                                                                                                                                                                                                                                                                                                                                                                                                                                                                                                                                                                                                                                                                                                                                                                                                                                                                                                                                  |                                                                                                                                                                                                                                                                                                                                                                                                                                                                                                                                                                                                                                                                                                                                                                                                                                                                                                         |
|-------------------------------------------------------------------------------------------------------------------------------------------------------------------------------------------------------------------------------------------------------------------------------------------------------------------------------------------------------------|-------------------------------------------------------------------------------------------------------------------------------------------------------------------------------------------------------------------------------------------------------------------------------------------------------------------------------------------------------------------------------------------------------------------------------------------------------------------------------------------------------------------------------------------------------------------------------------------------------------------------------------------------------------------------------------------------------------------------------------------------------------------------------------------------------------------------------------------------------------------------------------------------------------------------------------------------------------------------------------------------------------------------------------------------------------------------------------------------------------------------------------------------------------------------------------------------------------------------------------------------------------------------------------------------------------------------------------|--------------------------------------------------------------------------------------------------------------------------------------------------------------------------------------------------------------------------------------------------------------------------------------------------------------------------------------------------------------------------------------------------------------------------------------------------------------------------------------------------------------------------------------------------------------------------------------------------------------------------------------------------------------------------------------------------------------------------------------------------------------------------------------------------------------------------------------------------------------------------------------------------------------------------------------------------------------------------------------------------------------------------------------------------|---------------------------------------------------------------------------------------------------------------------------------------------------------------------------------------------------------------------------------------------------------------------------------------------------------------------------------------------------------------------------------------------------------------------------------------------------------------------------------------------------------------------------------------------------------------------------------------------------------------------------------------------------------------------------------------------------------------------------------------------------------------------------------------------------------------------------------------------------------------------------------------------------------|
| 1<br>2<br>3<br>4<br>5<br>6<br>7<br>8<br>9<br>10<br>11<br>12<br>13<br>14<br>15<br>16<br>17<br>18<br>19<br>20<br>21<br>22<br>23<br>24<br>25<br>26<br>27<br>28<br>29<br>30<br>31<br>32<br>33<br>34<br>35<br>36<br>37<br>38<br>39<br>40<br>41<br>42<br>43<br>44<br>45<br>46<br>47<br>48<br>49<br>50<br>51<br>52<br>53<br>54<br>55<br>56<br>57<br>58<br>59<br>60 | <p>I am able to find solutions despite limited resources</p> <p>I have tried to understand somebody else's POV</p> <p>I have demonstrated patience and tolerance</p> <p>I relied heavily on the basic skills of my profession</p> <p>I lost some confidence in my clinical practice</p> <p>I thought about and appreciated</p> <p>I think I have developed bad work habits</p> <p>I actively managed risk, including anticipating risk and evaluating environment</p> <p>I frequently managed projects</p> <p>I managed one or more situations that I consider to be a tragedy</p> <p>I established communication systems (formal and informal)</p> <p>I changed the way I speak so that somebody can understand me</p> <p>I frequently had to rely on my non-verbal communication</p> <p>I demonstrated that I am highly skilled in challenging conversations and effective communication, even in high pressure situations</p> <p>I dealt with difficult people</p> <p>I demonstrated that I am able to manage difficult people</p> <p>I taught clinical colleagues</p> <p>Perceptions of yourself</p> <p>When I work clinically I am frequently thinking about basic scientific principles (e.g. physiology, cell biology, biochemistry)</p> <p>I have a good knowledge of how healthcare systems outside of the UK function</p> | <p>What if don't have limited resources i.e. in UK</p> <p>I have understood somebody else's POV</p> <p>Need time marker</p> <p>Need more examples</p> <p>Change to: Sometimes I feel I have forgotten the things I have learnt</p> <p>Maybe use just appreciated</p> <p>Remove 'I think' and include some</p> <p>Too much- change to I anticipated risk and actively managed it</p> <p>Chance to tragic situations</p> <p>What about if they are already established</p> <p>Change to I have adapted my communication to suit to context</p> <p>I frequently relied on my non-verbal communication</p> <p>I demonstrated that I am skilled in challenging conversations, even in high pressure situations</p> <p>Include frequently</p> <p>I demonstrated that I am able to manage difficult people effectively</p> <p>(of any profession at any career stage)</p> <p>Change to About you – and change the other to demographics</p> <p>Change e.g's</p> <p>I have an awareness of how other healthcare systems (outside of the UK) function</p> | <p>Leave as is, participants won't agree if have adequate resources</p> <p>Remove tried</p> <p>Change to -I have frequently demonstrated patience and tolerance</p> <p>Include low tech and intuitive</p> <p>Leave as is, participants will know what clinical practice is</p> <p>change</p> <p>I have developed some bad work habits</p> <p>I anticipated risk and actively managed it (e.g. evaluating environment)</p> <p>Include e.g. (including one continuous project, or components of a project)</p> <p>Leave as is</p> <p>Changed to established/used</p> <p>Leave as is, too much jargon in suggestion</p> <p>Change</p> <p>Removed some to make it more understandable</p> <p>I frequently dealt with difficult people</p> <p>Add in effectively</p> <p>Add in brackets</p> <p>Change</p> <p>Physiology, chemistry</p> <p>Change- as most people will only know 1 or 2 countries not all</p> |
|-------------------------------------------------------------------------------------------------------------------------------------------------------------------------------------------------------------------------------------------------------------------------------------------------------------------------------------------------------------|-------------------------------------------------------------------------------------------------------------------------------------------------------------------------------------------------------------------------------------------------------------------------------------------------------------------------------------------------------------------------------------------------------------------------------------------------------------------------------------------------------------------------------------------------------------------------------------------------------------------------------------------------------------------------------------------------------------------------------------------------------------------------------------------------------------------------------------------------------------------------------------------------------------------------------------------------------------------------------------------------------------------------------------------------------------------------------------------------------------------------------------------------------------------------------------------------------------------------------------------------------------------------------------------------------------------------------------|--------------------------------------------------------------------------------------------------------------------------------------------------------------------------------------------------------------------------------------------------------------------------------------------------------------------------------------------------------------------------------------------------------------------------------------------------------------------------------------------------------------------------------------------------------------------------------------------------------------------------------------------------------------------------------------------------------------------------------------------------------------------------------------------------------------------------------------------------------------------------------------------------------------------------------------------------------------------------------------------------------------------------------------------------|---------------------------------------------------------------------------------------------------------------------------------------------------------------------------------------------------------------------------------------------------------------------------------------------------------------------------------------------------------------------------------------------------------------------------------------------------------------------------------------------------------------------------------------------------------------------------------------------------------------------------------------------------------------------------------------------------------------------------------------------------------------------------------------------------------------------------------------------------------------------------------------------------------|

|                                                                                                                                                                                                                                                                                                                                                             |                                                                                                                                                                                                                                                                                                                                                                                                                                                                                                                                                                                                                                                                                                                                                                                                                                                                                                                                                                |                                                                                                                                                                                                                                                                                                                                                                                                                                                                                                                                                                                                                                                                                                                              |                                                                                                                                                                                                                                                                                                                                                                                                                                                                                                                                                                                                                                                                                                                                                                                                                                                                                                                                                                                                                                                                                                                                                                                                                                                                                                                                                                                                                                                                                  |
|-------------------------------------------------------------------------------------------------------------------------------------------------------------------------------------------------------------------------------------------------------------------------------------------------------------------------------------------------------------|----------------------------------------------------------------------------------------------------------------------------------------------------------------------------------------------------------------------------------------------------------------------------------------------------------------------------------------------------------------------------------------------------------------------------------------------------------------------------------------------------------------------------------------------------------------------------------------------------------------------------------------------------------------------------------------------------------------------------------------------------------------------------------------------------------------------------------------------------------------------------------------------------------------------------------------------------------------|------------------------------------------------------------------------------------------------------------------------------------------------------------------------------------------------------------------------------------------------------------------------------------------------------------------------------------------------------------------------------------------------------------------------------------------------------------------------------------------------------------------------------------------------------------------------------------------------------------------------------------------------------------------------------------------------------------------------------|----------------------------------------------------------------------------------------------------------------------------------------------------------------------------------------------------------------------------------------------------------------------------------------------------------------------------------------------------------------------------------------------------------------------------------------------------------------------------------------------------------------------------------------------------------------------------------------------------------------------------------------------------------------------------------------------------------------------------------------------------------------------------------------------------------------------------------------------------------------------------------------------------------------------------------------------------------------------------------------------------------------------------------------------------------------------------------------------------------------------------------------------------------------------------------------------------------------------------------------------------------------------------------------------------------------------------------------------------------------------------------------------------------------------------------------------------------------------------------|
| 1<br>2<br>3<br>4<br>5<br>6<br>7<br>8<br>9<br>10<br>11<br>12<br>13<br>14<br>15<br>16<br>17<br>18<br>19<br>20<br>21<br>22<br>23<br>24<br>25<br>26<br>27<br>28<br>29<br>30<br>31<br>32<br>33<br>34<br>35<br>36<br>37<br>38<br>39<br>40<br>41<br>42<br>43<br>44<br>45<br>46<br>47<br>48<br>49<br>50<br>51<br>52<br>53<br>54<br>55<br>56<br>57<br>58<br>59<br>60 | <p>I have a professional network that includes people from around the world</p> <p>I tend to develop a good understanding of how organisations can work</p> <p>I am someone who focuses on solutions not problems</p> <p>I have an excellent work ethic</p> <p>I keep trying when things are difficult</p> <p>I have an excellent understanding of the roles and responsibilities of all the professional staff I work with</p> <p>I am quick to judge other people</p> <p>I believe I have the ability to empower patients to help themselves</p> <p>I believe I have the ability to empower colleagues to help themselves</p> <p>In my work I have demonstrated skills in changing patients behaviour</p> <p>Its crucial to consciously make an effort to get on with colleagues</p> <p>I demonstrated that I am capable of getting the most out of people</p> <p>Community participation is crucial...</p> <p>Job satisfaction</p> <p>Life satisfaction</p> | <p>Change to other countries</p> <p>Change to I have</p> <p>Comments that no-one would answer no to this</p> <p>Comments to change to conscientious</p> <p>Comments to change to persevere</p> <p>Change to clear</p> <p>Add admit and sometimes</p> <p>I am able to empower patients to help themselves, also patients isn't the word midwives use</p> <p>I am able empower colleagues to help themselves</p> <p>In encouraging and supporting patients to change behaviour</p> <p>Add' I feel'</p> <p>Change to 'best' move to 'in the last month'</p> <p>Add I feel</p> <p>Use validated single item- Taking everything into consideration, I am satisfied with my job</p> <p>Instead use 5 item validated SWLS scale</p> | <p>May not be around the world, just in 1 or 2 countries</p> <p>Tend to confuses things</p> <p>Then it would disappear in the psychometrics and statistics so leave</p> <p>Will not change means something different</p> <p>Yes keep simple</p> <p>I have a clear understanding of the roles and responsibilities of all the professional staff I work with</p> <p>I admit I am sometimes quick to judge other people</p> <p>Remove believe as adds another dimension, keep patients as it is obvious who we mean to that 1 group</p> <p>Remove believe as adds another dimension</p> <p>Change to -In my work I have demonstrated skills in encouraging and supporting patients to change behaviour</p> <p>No need to add 'I feel' adds another dimension</p> <p>Change to - I demonstrated that I am capable of getting the best out of people- move to last month, add enabling into e.g's</p> <p>No need to add 'I feel' adds another dimension</p> <p>Reliability and Validity of a Single-Item Measure of Job Satisfaction Christyn L. Dolbier, PhD; Judith A. Webster, MSN; Katherine T. McCalister, EdD; Mark W. Mallon, MS; Mary A. Steinhardt, EdD, LPC</p> <p>an adaptation of the one in the literature that correlates with other larger measures, to suit the current format of an agreement likert scale?</p> <p>Ed Diener, Robert A. Emmons, Randy J. Larsen and Sharon Griffin as noted in the 1985 article in the <i>Journal of Personality Assessment</i></p> |
|-------------------------------------------------------------------------------------------------------------------------------------------------------------------------------------------------------------------------------------------------------------------------------------------------------------------------------------------------------------|----------------------------------------------------------------------------------------------------------------------------------------------------------------------------------------------------------------------------------------------------------------------------------------------------------------------------------------------------------------------------------------------------------------------------------------------------------------------------------------------------------------------------------------------------------------------------------------------------------------------------------------------------------------------------------------------------------------------------------------------------------------------------------------------------------------------------------------------------------------------------------------------------------------------------------------------------------------|------------------------------------------------------------------------------------------------------------------------------------------------------------------------------------------------------------------------------------------------------------------------------------------------------------------------------------------------------------------------------------------------------------------------------------------------------------------------------------------------------------------------------------------------------------------------------------------------------------------------------------------------------------------------------------------------------------------------------|----------------------------------------------------------------------------------------------------------------------------------------------------------------------------------------------------------------------------------------------------------------------------------------------------------------------------------------------------------------------------------------------------------------------------------------------------------------------------------------------------------------------------------------------------------------------------------------------------------------------------------------------------------------------------------------------------------------------------------------------------------------------------------------------------------------------------------------------------------------------------------------------------------------------------------------------------------------------------------------------------------------------------------------------------------------------------------------------------------------------------------------------------------------------------------------------------------------------------------------------------------------------------------------------------------------------------------------------------------------------------------------------------------------------------------------------------------------------------------|

|                                                                                                                                     |                                                                                                                                                                          |                                                                                                                                                                                                                                                                                                     |
|-------------------------------------------------------------------------------------------------------------------------------------|--------------------------------------------------------------------------------------------------------------------------------------------------------------------------|-----------------------------------------------------------------------------------------------------------------------------------------------------------------------------------------------------------------------------------------------------------------------------------------------------|
| I sometimes I felt like an outsider                                                                                                 | I sometimes felt like an outsider in my environment                                                                                                                      | Add in my environment to make it more contextualised, move to culture area rather than life satisfaction as it seems less intrusive                                                                                                                                                                 |
| In my ability to manage situations that I consider to be awful, tragic or difficult                                                 | Remove awful, too many words                                                                                                                                             | In my ability to manage situations that I consider to be tragic or difficult                                                                                                                                                                                                                        |
| In my ability to manage myself                                                                                                      | Expand into 2:<br>In my ability to manage myself in a clinical environment<br>In my ability to manage myself in life generally (e.g. time management, managing emotions) | Split into 2                                                                                                                                                                                                                                                                                        |
| In my ability to adapt and be flexible in work                                                                                      | Would be different for clinical and everything else – pp more confident<br>In ability to be flexible clinically                                                          | Separated                                                                                                                                                                                                                                                                                           |
| In my ability to find solutions despite limited resources                                                                           | See above comment about 'despite'                                                                                                                                        | Maybe as this is confidence have, ability to find solutions in an environment with limited resources, the above one could literally say, in the last month I have had to find solutions in an environment with limited resources, then we expect low scores pre, and high during and possibly post. |
| That I can apply my clinical knowledge in any health systems                                                                        | Change any to another                                                                                                                                                    | That I can apply my clinical knowledge in another health system                                                                                                                                                                                                                                     |
| In my ability to work within an unfamiliar power dynamic                                                                            | Don't quite understand the question, suggested are you affected by power dynamics                                                                                        | Are you affected would change the question. move to in the last month, have been affected by power dynamics and one about dealing with it appropriately                                                                                                                                             |
| In my workplace                                                                                                                     | Remove place                                                                                                                                                             | Change to in my work                                                                                                                                                                                                                                                                                |
| In my ability to disseminate best practice globally                                                                                 | Globally too big, maybe across a wider context (e.g. to other countries)                                                                                                 | Change to disseminate UK best practice to other countries                                                                                                                                                                                                                                           |
| Career Stage                                                                                                                        | Louise and John had- experienced, mid etc.                                                                                                                               | Change to year of registration free text                                                                                                                                                                                                                                                            |
| Nationality                                                                                                                         | British, European, non-eu (LMIC) non-EU (high income)                                                                                                                    | Change to free text                                                                                                                                                                                                                                                                                 |
| Project Name                                                                                                                        | Make non-mandatory and ask to describe in one sentence project- e.g. RCM project in Uganda based in Mulago Hospital                                                      | in a sentence describe the title of your project and where it takes place e.g., RCM mentoring project in Mulago Hospital, Uganda. Or Milton Keynes Hospital Trust training project in University of City, Country                                                                                   |
| I would feel comfortable working in a high risk situations                                                                          | Comment- Is the risk to the patient or the volunteer                                                                                                                     | High risk situation is well defined                                                                                                                                                                                                                                                                 |
| I agreed with and internationalised lots of the knowledge, skills, behaviours and attitudes of the other staff in the host facility | Too confusing                                                                                                                                                            | Simplify sentence                                                                                                                                                                                                                                                                                   |

|                                                                                      |                                                                                                                                                                                                     |                                                                                                                                                                                                                                                                                                                                              |                                                                                                                                                                                 |
|--------------------------------------------------------------------------------------|-----------------------------------------------------------------------------------------------------------------------------------------------------------------------------------------------------|----------------------------------------------------------------------------------------------------------------------------------------------------------------------------------------------------------------------------------------------------------------------------------------------------------------------------------------------|---------------------------------------------------------------------------------------------------------------------------------------------------------------------------------|
| 1<br>2<br>3<br>4<br>5<br>6<br>7                                                      | At least once I questioned by view of reality                                                                                                                                                       | Confusing- changed answer after I explained                                                                                                                                                                                                                                                                                                  | Change to at least once I have been aware of my opinions or perspectives changing in a profound way'                                                                            |
| 8<br>9<br>10<br>11<br>12<br>13<br>14<br>15<br>16<br>17<br>18<br>19<br>20<br>21<br>22 | Which of the following were correct about local staff:<br><br>I engaged with them frequently<br><br>There was frequently a more knowledgeable person than me around<br><br>We had many share values | Reword- seems like everyone would agree<br><br>Too Context Specific<br><br>Said they did but didn't act on it                                                                                                                                                                                                                                | This is about Vygotskys MKO, could we separate into 2- more clinically knowledgeable, more culturally knowledgeable<br><br>change to, it was obvious we had many shared values? |
| 23<br>24<br>25                                                                       | Health consequences (animal bites, injuries, illness)                                                                                                                                               | Remove animal bites, gets confused with mosquito bites which most people would get                                                                                                                                                                                                                                                           | Remove animal bites                                                                                                                                                             |
| 26<br>27<br>28                                                                       | I feel unable to cope with NHS paperwork                                                                                                                                                            | Not to do with placement                                                                                                                                                                                                                                                                                                                     | Doesn't matter? If its not to do with placement, then we will see that it is the same before and after?                                                                         |
| 29<br>30<br>31                                                                       | I would like to leave the NHS to work overseas                                                                                                                                                      | Not all employed by NHS                                                                                                                                                                                                                                                                                                                      | Change to NHS/UK                                                                                                                                                                |
| 32                                                                                   | Project Managers:                                                                                                                                                                                   |                                                                                                                                                                                                                                                                                                                                              |                                                                                                                                                                                 |
| 33<br>34<br>35<br>36<br>37<br>38<br>39<br>40<br>41<br>42                             | Which of the following describe the relationship between your organisation and the receiving organisation:<br>We depend on eachother                                                                | Weird statement<br><br>Add in well maintained relationships with local staff and leadership<br>Links with local experts                                                                                                                                                                                                                      | Remove                                                                                                                                                                          |
| 43<br>44<br>45<br>46<br>47                                                           | Does your project have links with local experts and well maintained relationships with local staff and leadership                                                                                   | Move to earlier Q                                                                                                                                                                                                                                                                                                                            | Move to earlier Q                                                                                                                                                               |
| 48<br>49<br>50<br>51<br>52<br>53<br>54<br>55<br>56<br>57<br>58<br>59<br>60           | What type of preparation do volunteers receive?                                                                                                                                                     | Add all<br><br>Change options to:<br>Contact with previous volunteers<br>Formal training and preparation events in the UK<br>Informal training and preparation events in the UK<br>Formal training and preparation events in host country<br>Informal training and preparation events in country<br>Handbook or written preparation<br>Other | What type of preparation do all volunteers receive? – otherwise one or two might get it<br><br>Change options                                                                   |

|                                                                                                                                                                                               |                                                                                                                                                                                                                                                                                                       |                                                                                                                                                                                                                                                                         |
|-----------------------------------------------------------------------------------------------------------------------------------------------------------------------------------------------|-------------------------------------------------------------------------------------------------------------------------------------------------------------------------------------------------------------------------------------------------------------------------------------------------------|-------------------------------------------------------------------------------------------------------------------------------------------------------------------------------------------------------------------------------------------------------------------------|
|                                                                                                                                                                                               |                                                                                                                                                                                                                                                                                                       |                                                                                                                                                                                                                                                                         |
| <p>What is the main focus of your project:</p> <p>Service delivery<br/>Capacity Building<br/>Development<br/>Sustainability<br/>Training<br/>Other</p>                                        | <p>Most would tick all</p>                                                                                                                                                                                                                                                                            | <p>Change to separate question:</p> <p>How important is sustainability/service delivery/capacity building to your project<br/>– Very Important • Important • Moderately Important • Slightly Important • Not Important</p> <p>Remove training development and other</p> |
| <p>Who was involved/consulting during development of aims, focus, structure, project tasks within your project</p>                                                                            | <p>Remove 'within your project'</p> <p>In example grey area (at some stage)</p> <p>Change health policy makers and management in LMIC to Management in LMIC<br/>Local government and policy makers</p>                                                                                                | <p>Change</p>                                                                                                                                                                                                                                                           |
| <p>Do your volunteers take recurring trips?</p>                                                                                                                                               | <p>Change options</p>                                                                                                                                                                                                                                                                                 | <p>Always<br/>Very Often<br/>Sometimes<br/>Rarely<br/>Never</p>                                                                                                                                                                                                         |
| <p>In the last year have any volunteers dropped out of your project?</p>                                                                                                                      | <p>Remove as too context specific could be illness etc</p>                                                                                                                                                                                                                                            | <p>Remove question</p>                                                                                                                                                                                                                                                  |
| <p>Is volunteer learning incorporated into project or assessed?</p>                                                                                                                           | <p>Comment- Add informal reporting and learning</p>                                                                                                                                                                                                                                                   | <p>Do you formally assess volunteer learning or professional or personal development? And then time points</p>                                                                                                                                                          |
| <p>How many volunteers are placed at one time within this project</p>                                                                                                                         | <p>Add on average</p>                                                                                                                                                                                                                                                                                 | <p>Add on average</p>                                                                                                                                                                                                                                                   |
| <p>How would you describe your organisation?</p>                                                                                                                                              | <p>Change list- does not encompass all, make tick box:</p> <ul style="list-style-type: none"> <li>• New organisation</li> <li>• Established organisation</li> <li>• Hospital or university link (health partnership)</li> <li>• Commercial/profit making</li> <li>• Not for profit/charity</li> </ul> |                                                                                                                                                                                                                                                                         |
| <p>Which of the following describe the relationship between your organisation and the receiving organisation?</p> <p>We depend on one another<br/>We are especially good at collaboration</p> | <p>Remove depend statement, weird and out of context<br/>Change collaboration one to we work well in collaboration</p>                                                                                                                                                                                | <p>Change</p>                                                                                                                                                                                                                                                           |

|                                                                                               |                                                                                                                                                      |                                                                                                         |
|-----------------------------------------------------------------------------------------------|------------------------------------------------------------------------------------------------------------------------------------------------------|---------------------------------------------------------------------------------------------------------|
| To the best of your knowledge, what income level is the host country?                         |                                                                                                                                                      | Remove now as we will code countries                                                                    |
| Do restructure of questions so similar are together                                           |                                                                                                                                                      | Do restructure                                                                                          |
|                                                                                               |                                                                                                                                                      |                                                                                                         |
| Add to post-placement                                                                         |                                                                                                                                                      |                                                                                                         |
| Which country was your placement in- free text                                                |                                                                                                                                                      | Add                                                                                                     |
| What support do your volunteers receive?<br><br>A local or western expert to provide feedback | Change to Have access to – move to volunteer post<br><br>Change to: an opportunity to get frequent feedback from a local or western senior colleague | Change to have access to and move to post placement- what support did you have access to?<br><br>Change |
| Are you the only project working in the healthcare facility                                   | Was yours the only project working in the healthcare facility                                                                                        | Change and more to post placement                                                                       |
| Length of stay                                                                                |                                                                                                                                                      | Move length of stay to Post placement                                                                   |
| Recurring visits                                                                              |                                                                                                                                                      | Move to post placement                                                                                  |

## **Table 5: How participants were recruited through collaborative organisations**

| Organisation        | Method of distribution of questionnaire                                                                                       | Target Group        | Number of people that had opportunity to engage                   |
|---------------------|-------------------------------------------------------------------------------------------------------------------------------|---------------------|-------------------------------------------------------------------|
| Ambulance Station 1 | Attended with paper versions                                                                                                  | All groups          | 15                                                                |
| Conference 1        | Handed out paper versions at conference, presented online link at conference, online link sent by contact within organisation | All groups          | Up to 400 on mailing list (who may have also attended conference) |
| Field Hospital 1    | Online link sent by contact within organisation                                                                               | Returned Volunteers | 180                                                               |
| Field Hospital 2    | Online Link sent by contact within organisation                                                                               | Returned Volunteers | 50                                                                |
| Field Hospital 3    | Attended event with paper version                                                                                             | All groups          | 6                                                                 |



|                                  |                                                                                                                       |                                          |                                    |
|----------------------------------|-----------------------------------------------------------------------------------------------------------------------|------------------------------------------|------------------------------------|
| Field Hospitals 4                | Online Link sent by contact within organisation                                                                       | All groups                               | 80                                 |
| General Practice 1               | Attended with paper versions                                                                                          | All groups                               | 4                                  |
| Health Partnership 1             | Online Link sent by contact within organisation                                                                       | Current Volunteers                       | 2                                  |
| Health Partnership 2             | Online Link sent by contact within organisation                                                                       | All groups                               | 6                                  |
| Health Partnership 3             | Online Link sent by contact within organisation, also asked to send to one colleague with no international experience | Returned and no international experience | 50                                 |
| Health Partnership 4             | Online Link sent by contact within organisation                                                                       | Pre Placement                            | Awaiting Response                  |
| Health Partnership 5             | Online Link sent by contact within organisation                                                                       | All groups                               | 6                                  |
| Health Partnership 6             | Online Link sent by contact within organisation                                                                       | All groups                               | 15                                 |
| Hospital 1                       | Online Link sent by contact within organisation                                                                       | All groups                               | 30                                 |
| Hospital 2                       | Attended induction events with paper versions                                                                         | All groups                               | 85                                 |
| Individual Influencer 1          | Posted link to personal twitter and emailed 7 colleagues                                                              | All groups                               | 182 twitter followers 7 colleagues |
| Online Community of Practice 1   | Posted link to Community of Practice Online group                                                                     | All groups                               | 297 members                        |
| Previous Research Participants 1 | Link sent by researcher directly to participants                                                                      | All groups                               | 290                                |
| Previous Research Participants 2 | Link sent directly to email addresses                                                                                 | All groups                               | 59                                 |
| Professional Network 1           | Link distributed in E bulletin                                                                                        | All groups                               | 374 opened link (sent to 1800)     |



|                         |                                                                                                                |                     |                                            |
|-------------------------|----------------------------------------------------------------------------------------------------------------|---------------------|--------------------------------------------|
| Professional Network 2  | Online Link sent by contact within organisation                                                                | All groups          | Awaiting response                          |
| Recruitment Event 1     | Attended event with paper versions                                                                             | All groups          | 15                                         |
| Recruitment Event 2     | Attended event with paper versions                                                                             | All groups          | 18                                         |
| Royal College 1         | Online Link sent by contact within organisation                                                                | Returned Volunteers | 70                                         |
| Royal College 2         | Online link sent by one member to a select few relevant individuals<br>Conference attended with paper versions | Returned Volunteers | 11                                         |
| Royal College 3         | Online Link sent by contact within organisation                                                                | Returned Volunteers | 19                                         |
| Royal College 4         | Link sent directly to group members email addresses                                                            | All groups          | 45                                         |
| Royal College 5         | Online Link sent by contact within organisation                                                                | All groups          | 437                                        |
| Royal College 6         | Link posted on global health facebook group                                                                    | All groups          | 79 in group                                |
| The Royal College 7     | Link posted on blog and to twitter                                                                             | All groups          | 1000 blog followers, 400 twitter followers |
| Trust 1                 | Online Link sent by contact within organisation                                                                | Returned Volunteers | 43                                         |
| University Alumni 1     | Link posted to Facebook, Twitter and LinkedIn groups                                                           | All groups          | 1000+                                      |
| University Department 1 | Online Link sent by contact within organisation (stated was only for qualified health professionals)           | All groups          | 270                                        |

|                         |                                                 |                             |     |
|-------------------------|-------------------------------------------------|-----------------------------|-----|
| University Department 2 | Online Link sent by contact within organisation | No international experience | 21  |
| University Department 3 | Online Link sent by contact within organisation | No international experience | 37  |
| University Department 4 | Paper versions handed out at end of lecture     | All groups                  | 17  |
| University Department 5 | Online Link sent by contact within organisation | All groups                  | 55  |
| University Department 6 | Online Link posted on students forum            | All groups                  | 500 |
| Volunteer Project 1     | Online Link sent by contact within organisation | Current Volunteers          | 9   |
| Volunteer Project 2     | Online Link sent by contact within organisation | All groups                  | 116 |
| Volunteer Project 3     | Online Link sent by contact within organisation | Pre placement               | 5   |
| Volunteer Project 4     | Online Link sent by contact within organisation | All groups                  | 4   |
| Volunteer Project 5     | Online Link sent by contact within organisation | Returned Volunteers         | 35  |

**Table 6: Staff Group x International Experience**

| Staff group                 | Past international experience | Currently internationally working | No experience - interested | No experience - not interested | Planned future international experience |     |
|-----------------------------|-------------------------------|-----------------------------------|----------------------------|--------------------------------|-----------------------------------------|-----|
| Medical and Dental          | 77                            | 20                                | 10                         | 7                              | 32                                      | 146 |
| Nursing and Midwifery       | 51                            | 2                                 | 39                         | 31                             | 13                                      | 136 |
| Allied Health Professionals | 23                            | 4                                 | 12                         | 17                             | 9                                       | 65  |
| Healthcare Scientists       | 6                             | 0                                 | 1                          | 5                              | 1                                       | 13  |
| Ambulance                   | 2                             | 0                                 | 1                          | 10                             | 1                                       | 14  |

|                                           |   |   |   |    |   |    |
|-------------------------------------------|---|---|---|----|---|----|
| Support to clinical staff (HCAs)          | 0 | 0 | 8 | 22 | 0 | 30 |
| NHS infrastructure support                | 1 | 0 | 3 | 1  | 0 | 5  |
| Other scientific, therapeutic & technical | 8 | 0 | 4 | 9  | 5 | 26 |
| Other                                     | 1 | 0 | 0 | 2  | 0 | 3  |

**Table 7 – Correlation coefficients between the latent variables. their standard errors and *p*-values. according to the proposed multidimensional item response theory model.**

|                         | Estimate | S.E.  | <i>p</i> -value<br>(two tailed) |
|-------------------------|----------|-------|---------------------------------|
| LIFE SATISFACTION       | WITH     |       |                                 |
| CONFIDENCE              | 0.295    | 0.045 | 0.000                           |
| CULTURAL                | WITH     |       |                                 |
| CONFIDENCE              | 0.41     | 0.044 | 0.000                           |
| LIFE SATISFACTION       | 0.223    | 0.051 | 0.000                           |
| ADAPTING COMMUNICATION  | WITH     |       |                                 |
| CONFIDENCE              | 0.12     | 0.044 | 0.000                           |
| LIFE SATISFACTION       | 0.223    | 0.049 | 0.000                           |
| CULTURAL                | 0.497    | 0.043 | 0.000                           |
| TEACHING                | WITH     |       |                                 |
| CONFIDENCE              | 0.662    | 0.031 | 0.000                           |
| LIFE SATISFACTION       | 0.208    | 0.049 | 0.000                           |
| CULTURAL                | 0.29     | 0.051 | 0.000                           |
| ADAPTING COMMUNICATION  | 0.319    | 0.048 | 0.000                           |
| DIFFICULT COMMUNICATION | WITH     |       |                                 |
| CONFIDENCE              | 0.518    | 0.035 | 0.000                           |
| LIFE SATISFACTION       | 0.196    | 0.046 | 0.000                           |
| CULTURAL                | 0.412    | 0.045 | 0.000                           |

1  
2  
3  
4  
5  
6  
7  
8  
9  
10  
11  
12  
13  
14  
15  
16  
17  
18  
19  
20  
21  
22  
23  
24  
25  
26  
27  
28  
29  
30  
31  
32  
33  
34  
35  
36  
37  
38  
39  
40  
41  
42  
43  
44  
45  
46  
47  
48  
49  
50  
51  
52  
53  
54  
55  
56  
57  
58  
59  
60

|                         | Estimate | S.E.  | <i>p</i> -value<br>(two tailed) |
|-------------------------|----------|-------|---------------------------------|
| ADAPTING COMMUNICATION  | 0.58     | 0.037 | 0.000                           |
| TEACHING                | 0.44     | 0.04  | 0.000                           |
| BEHAVIOUR CHANGE        | WITH     |       |                                 |
| CONFIDENCE              | 0.638    | 0.027 | 0.000                           |
| LIFE SATISFACTION       | 0.289    | 0.045 | 0.000                           |
| CULTURAL                | 0.397    | 0.051 | 0.000                           |
| ADAPTING COMMUNICATION  | 0.427    | 0.041 | 0.000                           |
| TEACHING                | 0.554    | 0.035 | 0.000                           |
| DIFFICULT COMMUNICATION | 0.558    | 0.035 | 0.000                           |
| MANAGEMENT              | WITH     |       |                                 |
| CONFIDENCE              | 0.563    | 0.035 | 0.000                           |
| LIFE SATISFACTION       | 0.113    | 0.051 | 0.025                           |
| CULTURAL                | 0.367    | 0.051 | 0.000                           |
| ADAPTING COMMUNICATION  | 0.436    | 0.043 | 0.000                           |
| TEACHING                | 0.545    | 0.036 | 0.000                           |
| DIFFICULT COMMUNICATION | 0.54     | 0.038 | 0.000                           |
| BEHAVIOUR CHANGE        | 0.364    | 0.044 | 0.000                           |
| TEAM WORK               | WITH     |       |                                 |
| CONFIDENCE              | 0.757    | 0.028 | 0.000                           |
| LIFE SATISFACTION       | 0.362    | 0.049 | 0.000                           |
| CULTURAL                | 0.497    | 0.047 | 0.000                           |
| ADAPTING COMMUNICATION  | 0.522    | 0.043 | 0.000                           |
| TEACHING                | 0.577    | 0.037 | 0.000                           |
| DIFFICULT COMMUNICATION | 0.653    | 0.036 | 0.000                           |
| BEHAVIOUR CHANGE        | 0.658    | 0.034 | 0.000                           |
| MANAGEMENT              | 0.696    | 0.032 | 0.000                           |
| FLEXIBILITY             | WITH     |       |                                 |
| CONFIDENCE              | 0.571    | 0.033 | 0.000                           |
| LIFE SATISFACTION       | 0.198    | 0.044 | 0.000                           |

|                         | Estimate | S.E.  | <i>p</i> -value<br>(two tailed) |
|-------------------------|----------|-------|---------------------------------|
| CULTURAL                | 0.492    | 0.039 | 0.000                           |
| ADAPTING COMMUNICATION  | 0.475    | 0.04  | 0.000                           |
| TEACHING                | 0.423    | 0.041 | 0.000                           |
| DIFFICULT COMMUNICATION | 0.497    | 0.038 | 0.000                           |
| BEHAVIOUR CHANGE        | 0.514    | 0.034 | 0.000                           |
| MANAGEMENT              | 0.527    | 0.036 | 0.000                           |
| TEAM WORK               | 0.705    | 0.03  | 0.000                           |

# BMJ Open

## Measuring the Outcomes of Volunteering for Education: Development and pilot of a tool to assess health professionals' personal and professional development from international volunteering

|                                 |                                                                                                                                                                                                                                                                                                   |
|---------------------------------|---------------------------------------------------------------------------------------------------------------------------------------------------------------------------------------------------------------------------------------------------------------------------------------------------|
| Journal:                        | <i>BMJ Open</i>                                                                                                                                                                                                                                                                                   |
| Manuscript ID                   | bmjopen-2018-028206.R2                                                                                                                                                                                                                                                                            |
| Article Type:                   | Research                                                                                                                                                                                                                                                                                          |
| Date Submitted by the Author:   | 14-Jun-2019                                                                                                                                                                                                                                                                                       |
| Complete List of Authors:       | Tyler, Natasha; University of Nottingham Business School<br>Collares, Carlos; Maastricht University, School of Health Professions Education<br>Byrne, Ged; Health Education England<br>Byrne-Davis, Lucie; The University of Manchester Faculty of Biology Medicine and Health, Medical Education |
| <b>Primary Subject Heading</b>: | Global health                                                                                                                                                                                                                                                                                     |
| Secondary Subject Heading:      | Health services research, Health policy, Medical education and training                                                                                                                                                                                                                           |
| Keywords:                       | • Personal and Professional Development, • International Placements, • Volunteering, • Health Professionals, • Low and Middle Income Countries, • Psychometric Tool                                                                                                                               |
|                                 |                                                                                                                                                                                                                                                                                                   |

SCHOLARONE™  
Manuscripts

1  
2  
3 **Measuring the Outcomes of Volunteering for Education: Development and**  
4  **pilot of a tool to assess health professionals' personal and professional**  
5  **development from international volunteering**  
6  
7  
8  
9

10 Tyler, N, University of Nottingham, natasha.tyler@nottingham.ac.uk (Corresponding  
11 Author)  
12

13  
14 Collares, CF, Maastricht University, c.collares@maastrichtuniversity.nl  
15

16  
17 Byrne, GJ, Health Education England, ged.byrne@hee.nhs.uk  
18

19  
20 Byrne-Davis, LMT, University of Manchester, UK lucie.byrne-  
21 davis@manchester.ac.uk  
22

23  
24  
25  
26  
27 Word Count: 4000  
28  
29  
30  
31  
32  
33  
34  
35  
36  
37  
38  
39  
40  
41  
42  
43  
44  
45  
46  
47  
48  
49  
50  
51  
52  
53  
54  
55  
56  
57  
58  
59  
60

## **Abstract**

**Objective:** The development and pilot of a self-report questionnaire, to assess personal and professional development of health professionals gained through experiences in low and middle-income countries.

**Design** The instrument was developed from a core set of the outcomes of international placements for UK health professionals. Principle component analysis and multidimensional item response theory were conducted using results of a cross-sectional pilot study to highlight items with the best psychometric properties.

**Setting:** Questionnaires were completed both online and in multiple UK health professional events face-to-face.

**Participants:** 436 Healthcare professional participants from the UK (with and without international experience) completed a 110-item questionnaire in which they assessed their knowledge, skills and attitudes.

**Measures:** The 110 item questionnaire included self-report questions on a 7-point Likert scale of agreement, developed from the core outcome set, including items on satisfaction, clinical skills, communication and other important health professional knowledge, skills, attitudes and behaviours. Item reduction led to development of the 40-item Measuring the Outcomes of Volunteering for Education- Tool (MOVE-iT). Internal consistency was evaluated by the Cronbach's  $\alpha$  coefficient. Exploratory analysis investigated the structure of the data using Principal Component Analysis and Multivariate Item Response Theory.

**Results:** Exploratory Analysis found 10 principle components that explained 71.80% of the variance. Components were labelled 'Attitude to work, Adaptability, Adapting Communication, Cultural Sensitivity, Difficult Communication, Confidence, Teaching, Management, Behaviour Change and Life Satisfaction'. Internal consistency was acceptable for the identified components ( $\alpha$  between 0.72 to 0.86).

**Conclusions:** A 40-item self-report questionnaire developed from a core outcome set for personal and professional development from international placements was developed, with evidence of good reliability and validity. This questionnaire will increase understanding of impact of international placements, facilitating



1  
2  
3 comparisons of different types of experience. This will aid decision making about  
4 whether UK health professionals should be encouraged to volunteer internationally  
5 and in what capacity.  
6  
7  
8  
9  
10

## 11 **Key Words**

- 14 • Personal and Professional Development
- 15 • International Placements
- 16 • Volunteering
- 17 • Health Professionals
- 18 • Low and Middle Income Countries
- 19 • Principle Component Analysis
- 20 • Psychometric Tool
- 21 • Learning Assessment
- 22 • Self-Assessment

## 23 **Article Summary**

### 24 **Strengths and Limitations of this Study**

- 25 • The Measuring the Outcomes of Volunteering for Education- Tool (MOVE-  
26 iT) was developed based on evidence from peer-reviewed literature and  
27 expert opinion
- 28 • The underlying structures of the instrument were explored using a large  
29 data set of 436 multi-disciplinary health professionals
- 30 • The psychometric analyses demonstrate good internal consistency  
31 reliability
- 32 • The MOVE-iT tool can be used to assess learning of health professionals  
33 volunteering in low and middle-income countries
- 34 • This tool provides a way of evidencing benefits, however there is a body of  
35 critical evidence outlining the ethical concerns of medical practice abroad,  
36 particularly when individuals practice in ways that they might not in a high-  
37 income country

## 38 **Background**

1  
2  
3 Globalisation of the health workforce has inevitably led to large numbers of qualified  
4 healthcare professionals choosing to temporarily (ranging between 1 day to 2 years) work  
5 overseas in some capacity, with many choosing low and middle income countries (LMICs)  
6 (1). In this paper we describe international placements in any LMIC (as defined by the  
7 OECD) in which the healthcare professional receives little or no remuneration; this is often  
8 referred to as volunteering. Such placements can take numerous forms, for example a  
9 dentist delivering a service on a hospital train in India (2), British healthcare professionals  
10 of many cadres working together in health partnerships with a hospital in Tanzania (3), or  
11 healthcare scientists working in labs in sub-Saharan Africa (4).

12  
13  
14  
15  
16  
17  
18  
19  
20 International health volunteering has been reported as resulting in personal and  
21 professional development (PPD), for example a change in attitudes on a personal level, or  
22 developing new/broadening existing professional skills, see our previous work for a full list  
23 of all reported PPD (5). Benefits have been reported for both the individual's practice and  
24 also patient outcomes upon return (6). Many professionals report PPD outcomes as a  
25 result of the new experience and particularly that working in an LMIC encourages  
26 healthcare professionals to learn new skills in an effort to adequately adapt, for example  
27 using new clinical techniques specific to the LMIC, or dealing with a new cultural  
28 phenomenon (7–9). Professionals report that LMICs provide staff with an opportunity to  
29 practice skills that they would not develop in a domestic work setting, as such giving them  
30 increased confidence in their work (8,10). In some academic papers professionals report  
31 perceived/expected exposure to higher numbers of clinical cases and often clinical cases  
32 that are more challenging than those seen in high income countries (HICs) as well as  
33 opportunities to lead, make decisions and work within new cultural and social norms  
34 (6,9,11,12). Many staff report a change in core attitudes or beliefs: a greater appreciation  
35 of caring, an acceptance of cultural differences or a changed/new/broader perspective  
36 (8,9,13,14). As a result, in the UK, some organisations have proposed that enabling and  
37 encouraging staff to work in LMICs may have great benefits to the NHS (6,7,15) and have  
38 expressed a desire to assess PPD outcomes (16,17) to provide quantitative evidence of  
39 benefit.

40  
41  
42  
43  
44  
45  
46  
47  
48  
49  
50  
51  
52  
53  
54  
55  
56  
57  
58  
59  
60  
Despite these reported benefits, volunteering is sometimes perceived as a loss to the high  
income country, for example our research found that within the UK National Health  
Service (NHS), some management perceived volunteering as a loss of staff within a

1  
2  
3 service that is already under pressure (15). As such, some employers are reluctant to  
4 release staff for international placements (15).  
5  
6  
7

8 Qualitative research into the benefits of international working or volunteering (from now on  
9 referred to as 'international placements' for ease), has reported similar PPD outcomes  
10 regardless of the host country, type of projects or individual's profession. Communication,  
11 leadership, attitude to work, flexibility and cultural awareness are frequently reported  
12 outcomes (2,6,9,12,18). However, from an educational perspective, precise information  
13 about this learning (process, outcomes, variables) is seldom reported. In a recent meta-  
14 synthesis and Delphi study, we reported a list of 116 outcomes (5) from a review of  
15 literature on international placements for healthcare professionals. The list included  
16 benefits and costs that were agreed by stakeholders to be frequently experienced by  
17 health professionals (of any cadre) in an international placement. Costs (e.g. health  
18 outcomes, financial loss, clinical de-skilling) are not reported in this paper, but can we  
19 found in the meta-synthesis (5). We also summarised the moderating (factors that affect  
20 the strength of a relationship) and mediating variables (factors that explain the relationship  
21 between two items) that were reported in the literature to potentially affect PPD outcomes  
22 (e.g. length of stay, host country, level of experience, supervision).  
23  
24  
25  
26  
27  
28  
29  
30  
31  
32  
33  
34  
35

36 There have been some attempts to quantify these outcomes, for example, a small number  
37 of previous UK papers have used a questionnaire approach to understand outcomes  
38 (8,19,20), but these have not taken a psychometric approach to the measurement of  
39 underpinning domains of learning (i.e. developed and tested an evidence based  
40 questionnaire). A number of psychometric questionnaires have been developed outside of  
41 the UK, but are based on non-domain specific outcomes for any professional, hence are  
42 not specific to healthcare professionals (21–23). For example, the IVIS used latent trait  
43 analysis and found 11 'volunteer outcome' factors including open-minded and intercultural  
44 relationships (24). It is not known whether there are unique elements of learning or  
45 outcomes that are specific to healthcare professionals (from within the NHS) that differ  
46 from the non-domain specific learning measured in existing tools. Particularly as some of  
47 the qualitative research suggests unique outcomes, for example related to patient  
48 interaction (9,25).  
49  
50  
51  
52  
53  
54  
55  
56  
57  
58  
59  
60

This study aimed to create a measure of the PPD outcomes of international placements.

1  
2  
3 We worked on the large set of outcomes that stakeholders agreed were core outcomes  
4 from international placements for health professionals (2). We aimed to reduce the items  
5 to a short questionnaire using item response theory to establish and test a set of latent  
6 traits and their associated questions.  
7  
8  
9

## 10 **Methods**

### 11 **Design**

12  
13  
14 We followed traditional tool development methods in order to develop a  
15 measurement tool (26). In summary, we took the PPD outcomes found in the  
16 previous study (27), made them into questions and then reduced their number  
17 through a process of piloting with health professionals and using statistical methods  
18 to eliminate items which were not congruent with other items or were redundant  
19 because they were too congruent with other items. We used a cross-sectional  
20 design, so participants were measured only at one time point. The study used Item  
21 Response Theory, whereby 'constructs' are theoretical terms that refer to  
22 unobserved, idealised entities (28). Latent traits are one type of construct, which are  
23 qualities possessed by individuals that can change, but only over the long term (28).  
24 Latent traits include attitudes, preferences and dispositions, but also elements that  
25 are important for professional development such as ability, expertise and aptitude  
26 (29). No measure of a latent trait is ever considered perfectly accurate, instead  
27 different measures are used to estimate latent traits (30), with varying levels of  
28 effectiveness (28).  
29  
30  
31  
32  
33  
34  
35  
36  
37  
38  
39  
40  
41  
42  
43

### 44 **Participants**

45  
46 Previous psychometric research on the sample size requirements for precise  
47 estimates of reliability coefficients; suggested we needed 400 participants (31). We  
48 therefore aimed to recruit the 400 participants across 4 different groups: 100 health  
49 professionals that had been on international placements in the past, 100 who were  
50 about to undertake an international placement or currently working overseas, 100  
51 with an interest in international placements but no past experience and 100 with no  
52 interest in or past experience of international placements. We included health  
53 professionals who had and who had not worked internationally. It is usual to do item  
54 reduction with a sample of the population who will be using the tool. Since the tool  
55  
56  
57  
58  
59  
60

1  
2  
3 could be used to compare PPD in health professionals with or without international  
4 experience or before and after international experience, we decided to include, in the  
5 sample, health professionals without international experience. We further subdivided  
6 our sample into people who were interested in international experience and not to  
7 ensure that the tool items were reduced on the basis of answers from people with all  
8 ranges of experience and perceptions of international placements. Participants were  
9 not excluded based on the years since NHS employment, provided they had this  
10 experience at some point. Inclusion criteria were that the participant be or have been  
11 an NHS employee (current or past), working/worked in a patient facing role as a  
12 qualified healthcare professional.  
13  
14  
15  
16  
17  
18  
19

## 20 Procedure

### 21 **Creating the pilot questionnaire**

22  
23  
24 We developed a questionnaire based on the core outcome set reported in our  
25 previous paper (5). Two members of the team looked for common inductive, themes  
26 across the outcomes (LBD, NT). We found experience, confidence and attitudes,  
27 where outcomes were to do with experience, we categorised them as experience  
28 and asked about the experiences they had during a suitable time period. If  
29 statements were about how confident they felt or attitudes they held, we categorised  
30 them as such and asked questions in that way. Statements were self-reported in  
31 terms of strength of agreement using a 7-point Likert scale. Where the core  
32 outcome reported in the previous paper, could be interpreted in multiple ways, we  
33 referred back to the original papers where the outcome was originally reported from  
34 the metasynthesis (5) and used this to make decisions about how to express the  
35 statement. If a statement could indicate change in experience, confidence and / or  
36 attitude, we developed questions for each.  
37  
38  
39  
40  
41  
42  
43  
44  
45  
46  
47  
48

49  
50 Two members of the team (LBD, NT) assessed each core outcome and generated  
51 103 statements with Likert scales of agreement for each statement (from strongly  
52 disagree to strongly agree). We excluded 40 items from the core outcome set which  
53 would not be measurable through self-report questionnaires. These were items  
54 about organisational outcomes for the NHS (8), outcomes that were too vague to be  
55 specifically defined (8) or overlapped in meaning with another and were combined  
56  
57  
58  
59  
60

1  
2  
3 (24). For example, '*exposure to ethical dilemmas*' and '*increased awareness*  
4 *of/knowledge about ethics*' were combined into '*I have frequently experienced ethical*  
5 *dilemmas*'. See supplementary material for a record of the decisions and their  
6 reasons. In addition 7 items from the Satisfaction with Life Scale were added (REF).  
7  
8  
9

10  
11 We included 56 statements about the frequency with which the individual had an  
12 experience or exhibited certain behaviour in the last month (regardless of where this  
13 last month's work took place). For example, 'In the last month I frequently dealt with  
14 difficult people'. We generated 19 confidence statements. For example, 'I am  
15 confident in my ability to teach others'. Other statements, which were more about  
16 attitudes and feelings were labelled included, for example, 'I have an excellent work  
17 ethic', (n=35). Supplementary material shows the matches between the outcomes  
18 and statements.  
19  
20  
21  
22  
23  
24

## 25 **Pre-pilot**

26  
27  
28 The questionnaire was pre-piloted on 16 participants, including seven from the  
29 MOVE research group (a group of Salford/Manchester researchers involved in  
30 similar research), to establish that the questionnaire was readable and  
31 understandable. We administered the tool online using eForms (32). The authors,  
32 plus the wider institutional team of researchers in international placements, met face-  
33 to-face to consider all of the written comments from the pilot. We conducted a  
34 cognitive interview with four participants, using both think aloud interviewing and  
35 verbal probing, whereby participants were questioned/asked to think aloud as they  
36 completed the questionnaire (33,34). Any comments, issues, questions or  
37 suggestions raised during the cognitive interviews were inputted into a table, one  
38 member of the team (NT) decided how best to act on each one and whether  
39 changes needed to be made. The table was then reviewed by another team member  
40 (LBD) and disagreements were discussed and resolved. This resulted in numerous  
41 changes being made to the statements, including using an existing life satisfaction  
42 scale (SWLS), previous research suggest using an existing validated for scale if one  
43 exists and the cognitive interviews and pre-pilot process highlighted the necessity to  
44 do this (26). As a result of this process a 110-item tool was created for the pilot  
45 phase.  
46  
47  
48  
49  
50  
51  
52  
53  
54  
55  
56  
57  
58  
59  
60

## Pilot

There were two methods of recruitment: online and face-to-face. Face-to-face participants were recruited using an opportunistic sample at health professional events nationwide (conferences, training events, exhibitions), many of which had an international focus (the majority of the sample gained this way were nurses and nursing assistants). Online participants were recruited in numerous ways, including links to the questionnaire posted on international volunteering blogs and in health professional newsletters and bulletins. The majority of the online sample was gathered using snowball sampling with key contacts within companies, projects and hospital health links that place professionals internationally agreed to send the link via email to health professionals, the majority of the doctors were responded online.

The tool was completed by participants either online or face-to-face, as was convenient and appropriate for the participants. Online participants received a link in an email, blog or online community and after giving consent. Face-to-face participants completed a paper version of the questionnaire. Of the 43 organisations that helped us recruit, nine involved face-to-face recruitment (21%). Recruitment took place between April and July 2016.

## Materials:

### Measure

The tool consisted of 110 statements measured on a 7-point Likert scale ranging from strongly agree to strongly disagree. The Likert scale contained the following descriptors: 1 Strongly Agree, 2, 3, 4 Neither Agree not Disagree, 5, 6, 7 Strongly Disagree (this was reverse coded for analysis as higher intensity ordinal constructs need to be higher values, strongly agree at 7, strongly disagree at 1). No statements were reversed.

An additional existing scale was used within the tool, the Satisfaction with Life Scale (SWLS) (35). This is a five-item scale that has been used frequently to measure satisfaction with life. This replaced a number of statements from the core outcome set about satisfaction with life, since the questions had already been refined and tested for validity and reliability and guidelines suggest using existing scales where possible (26,35).



1  
2  
3 In addition to the 110 statements, participants demographic and placement data was  
4 also gathered. Each participant was asked basic demographic questions: age,  
5 gender, profession, employment status, nationality and years since registration.  
6  
7 Past experience on international placements was also recorded (country, length of  
8 stay).  
9  
10  
11

## 12 **Analyses**

### 13 **Principal Component Analysis**

14  
15 We used successive iterations of principal component analysis to reduce the pool of  
16 items, so that only the items with optimal psychometric properties would remain.  
17  
18 Principal Component Analysis (PCA) is a dimension-reduction tool that can be used  
19 to reduce a large set of items to a small set that still contains most of the information  
20 in the large set (36). Initially, a parallel analysis was performed to determine the  
21 number of factors. Items with low communalities ( $<0.500$ ) or loadings below 0.3 were  
22 withdrawn in subsequent iterations. In the final iterations, exclusions were performed  
23 at an item-by-item basis. We decided that even if there were more items in one  
24 domain we would retain them if they had adequate psychometric properties. PCA  
25 was performed in IBM SPSS 23 (37).  
26  
27  
28  
29  
30  
31  
32  
33  
34  
35  
36  
37  
38  
39  
40

### 41 **Multidimensional Item Response Theory**

42 We created a multidimensional item response theory (MIRT) model, based on the  
43 results of the best iteration of the PCA in order to test the structure of the factors we  
44 found and remove any items which did not improve the assessment of each factor.  
45 MIRT is analogous to confirmatory factor analysis (CFA) (38) but, unlike CFA, MIRT  
46 considers all Likert scale variables as categorical, which is more appropriate for our  
47 data. MIRT parameters in this study were estimated using weighted least squares  
48 means- and variance-adjusted, given their appropriateness for categorical variables  
49 in comparison to Bayesian estimation, which would be an operationally attractive  
50 alternative, given the high dimensionality of the data (39). MIRT analysis was  
51 performed in Mplus 8 (40).  
52  
53  
54  
55  
56  
57  
58  
59  
60

### 61 **Patient and Public Involvement**



No patient involved

## **Results**

### **Pilot**

### **Participants**

Four hundred and thirty six participants completed the questionnaire, 42% (182/436) of participants had no international experience (Table 1).

**Table 1: Participants: Anticipated and Actual Numbers**

| <b>Group</b>                                | <b>Target</b> | <b>N included (%)</b>                                    | <b>Percentage of target</b> |
|---------------------------------------------|---------------|----------------------------------------------------------|-----------------------------|
| Currently Overseas/Due to Depart            | 100           | 79 (18%)<br>(26 Currently Overseas.<br>53 Due to Depart) | 79%                         |
| Past International Experience               | 100           | 169 (39%)                                                | 169%                        |
| No International Experience- Interested     | 100           | 78 (18%)                                                 | 78%                         |
| No International Experience- Not Interested | 100           | 104 (24%)                                                | 104%                        |
| <b>Total</b>                                | <b>400</b>    | <b>436 (100%)</b>                                        | <b>109%</b>                 |

All participants were NHS employees (past or present). Staff group representation was largely in line with the NHS North West employee data (41), whereby 30% of the workforce is nursing and midwifery (Table 2). The other staff groups were also relatively proportionate, besides Medical and Dental which represents only 9% of the North West workforce and support to staff (28%). This suggests that any item reduction based on variability in responses from the sampled group were largely representative of the NHS workforce. Table 3 shows the participant demographics.

**Table 2: Professions of participants**

| <b>Staff group</b>    | <b>n</b> | <b>Pilot sample</b> | <b>NHSNW (41)</b> |
|-----------------------|----------|---------------------|-------------------|
| Medical and Dental    | 146      | 34%                 | 9%                |
| Nursing and Midwifery | 135      | 31%                 | 30%               |

|                                           |    |     |     |
|-------------------------------------------|----|-----|-----|
| Allied Health Professionals               | 64 | 15% | 6%  |
| Healthcare Scientists                     | 13 | 3%  | 3%  |
| Ambulance                                 | 13 | 3%  | 2%  |
| Support to clinical staff                 | 30 | 7%  | 28% |
| NHS infrastructure support                | 5  | 1%  | 18% |
| Other scientific, therapeutic & technical | 3  | 1%  | 4%  |
| Other                                     | 25 | 6%  | <1% |

**Table 3: Participant Demographic Information: age, employment status, nationality, gender and career stage (years since registration was used as a proxy measure of experience)**

| Age          | n   | Employment status | n   | Nationality  | n   | Years since registration | n   | Gender | n   |
|--------------|-----|-------------------|-----|--------------|-----|--------------------------|-----|--------|-----|
| Under 25     | 35  | Full Time         | 325 | British      | 350 | <5 Years                 | 98  | Male   | 113 |
| 26-30        | 76  | Part Time         | 72  | English      | 7   | 6 to 15                  | 137 | Female | 323 |
| 31-40        | 127 | Retired           | 20  | Irish        | 11  | 16 to 25                 | 60  | Total  | 436 |
| 41-50        | 84  | Student           | 16  | Scottish     | 4   | 26+                      | 94  |        |     |
| 51-60        | 81  | Unemployed        | 3   | Welsh        | 1   | Total                    | 389 |        |     |
| 61-70        | 32  | Total             | 436 | N Irish      | 2   | Missing Data             | 47  |        |     |
| Total        | 435 |                   |     | EU           | 12  |                          |     |        |     |
| Missing Data | 1   |                   |     | Non EU       | 28  |                          |     |        |     |
|              |     |                   |     | Dual         | 7   |                          |     |        |     |
|              |     |                   |     | British      |     |                          |     |        |     |
|              |     |                   |     | Total        | 422 |                          |     |        |     |
|              |     |                   |     | Missing Data | 14  |                          |     |        |     |

## Principal Component Analysis

1  
2  
3 The principal component analysis used the correlation matrix obtained from the  
4 application of the questionnaire to the 436 participants. The 436 responses included  
5 those with no international experience to account for the range of variability in  
6 response across the NHS workforce, regardless of experience. Twenty-one  
7 iterations of principal component analysis were performed. From the original set of  
8 items, only 40 items were chosen for the last iteration of the principal component  
9 analysis. The Kaiser-Meyer-Olkin measure showed the level of sampling adequacy  
10 to be acceptable (KMO = 0.896). The lowest measure of sample adequacy for an  
11 individual item was 0.810 (*"I demonstrated I'm a good teacher"*). The Bartlett's  
12 sphericity test indicated that the inter-item correlations were sufficient for proceeding  
13 with the analysis. The lowest value for the items' communalities was 0.590 (*"If I  
14 could live my life over, I would change almost nothing"*), which is above the aimed  
15 threshold of 0.500. After *varimax* rotation, 10 factors were extracted taking into  
16 account the findings of the scree plot and of a Monte Carlo parallel analysis. The 10  
17 factors explained 71.80% of the variance. On the scree plot (see Figure 1) it is  
18 possible to observe that the first five factors had the highest eigenvalues.  
19  
20  
21  
22  
23  
24  
25  
26  
27  
28  
29  
30  
31

### 32 **Multi-Dimensional Item Response Theory**

33  
34 The diagram with the resulting model; which contains the items selected for each one  
35 of the latent variables, the loadings for each item and the correlation coefficients  
36 between the constructs, can be seen in Figure 2. This model was chosen as it was  
37 the best possible solution to reconcile the need of creating a comprehensive,  
38 content-rich questionnaire while obtaining satisfactory evidence of validity based on  
39 its internal structure. In terms of goodness-of-fit, the model had significantly better fit  
40 than a unidimensional solution in the chi-square test for difference testing ( $\chi^2 =$   
41 2889.749,  $df = 45$ ,  $p < 0.001$ ). The comparison of goodness-of-fit indices between  
42 the unidimensional solution and the proposed model can be observed in Table  
43 4. The chi-square is not the chi-square of any model but the chi-square of the  
44 difference of the chi-squares of each model separately.  
45  
46  
47  
48  
49  
50  
51  
52  
53  
54  
55  
56

57 **Table 4 – Comparison of selected goodness-of-fit indices between the**  
58 **unidimensional model and the proposed model.**  
59  
60

| Models         | $\chi^2$ | df  | $\chi^2/df$ | RMSEA | CFI   | TLI   | WRMR  |
|----------------|----------|-----|-------------|-------|-------|-------|-------|
| Unidimensional | 8206.204 | 740 | 11.089      | 0.152 | 0.641 | 0.622 | 3.511 |
| Proposed model | 1736.922 | 695 | 2.499       | 0.059 | 0.950 | 0.944 | 1.271 |

**Table 5- Cronbach's alpha co-efficient for each construct**

| Construct               | Cronbach's alpha |
|-------------------------|------------------|
| Adapting Communication  | 0.88             |
| Confidence              | 0.86             |
| Life satisfaction       | 0.86             |
| Difficult communication | 0.86             |
| Management skills       | 0.86             |
| Attitude to work        | 0.82             |
| Flexibility             | 0.83             |
| Teaching skills         | 0.78             |
| Behaviour Change        | 0.77             |
| Cultural awareness      | 0.72             |

Reliability estimates were calculated using Cronbach's alpha coefficients but also using estimates of individual precision calculated based on the individual estimates of the standard errors of measurement. Figure 1 shows the precision curves for each latent variable. While "Confidence", "Life Satisfaction" and "Attitudes to Work" had the highest means for the individual precision estimates, "Adaptability" was the construct that achieved the highest precision estimates for most of the theta spectrum. "Attitude to work" had the lowest estimates for individual precision. Using the information functions as indicators of precision, "Flexibility" achieved the highest values and "Attitude to work", the lowest ones. As expected, an inverse situation is observable on the curves for the standard errors of measurement, with "Flexibility" showing the lowest measurement errors and "Attitude to work" the highest ones. The precision, information and standard error curves for the retrieved constructs under the MIRT analysis can be observed in Figures 3, 4 and 5. The precision, information and SE curves demonstrate that the quality of the measures for each one of the proposed constructs varies across the latent spectrum, with lower levels of reliability

1  
2  
3 and information and higher levels of standard error of measurement in the extremes  
4 of the latent spectrum. The extreme right side of the spectrum has the worst  
5 reliability and highest error. The information curve, therefore, is indirect evidence of  
6 reliability with the advantage of being sample-independent.  
7  
8  
9

10  
11 Table 5 shows the Cronbach's alpha coefficients for each one of the retrieved  
12 constructs. Taking the Cronbach's alpha coefficients into account, the reliability  
13 estimates are somewhat divergent from the MIRT-based precision estimates. Using  
14 Cronbach's alpha, the most reliable factor was "Adapting Communication" and the  
15 least reliable was "Cultural Awareness".  
16  
17  
18  
19

20  
21 The analysis resulted in 40 items grouped into 10 constructs, the final list of constructs  
22 and the items that belong on each can be seen in Table 6. Table 6 also shows the  
23 loading estimates, the standard errors of the loading estimates, the ratios between the  
24 estimate and the standard error and the two-tailed  $p$ -values for the estimates. Table 6  
25 shows the final selection of items with the dimension each one of them belongs.  
26  
27  
28  
29

30 <insert table 6>  
31

32 <insert figures 1-5>  
33  
34

## 35 Discussion

36  
37 In this study we converted stakeholder agreed PPD outcomes of health professional  
38 international placements (27) into outcome statements, to assess which have the  
39 best psychometric properties for self-assessment. By piloting these statements with  
40 a large set of healthcare professionals and using item response theory to establish  
41 and test a set of latent traits and their associated questions, we were able to  
42 determine the 40 items with the best psychometric properties to create the MOVEiT  
43 tool. Reliability evidence is favourable to the latent trait structure, both when using a  
44 single coefficient for the entire sample, and under the multidimensional item  
45 response theory approach. The validity evidence based on the internal structure of  
46 the questionnaire detailed in this study, combined with the content validity evidence  
47 based on the selection of the initial pool of items (5) helps build a strong validity  
48 argument in favour of the use of this questionnaire for the measurement of PDD-  
49 related dimensions of international placements. There were many more outcomes  
50 retained within the confidence domain as there were more items in the original data  
51  
52  
53  
54  
55  
56  
57  
58  
59  
60

1  
2  
3 that we about confidence, and these items demonstrated more variability in  
4 responses regarding what people were confident about. We kept this as a large  
5 domain as we did not want to lose the richness of that data.  
6  
7  
8  
9

10  
11 This paper aimed to consider whether a unique tool is needed to assess outcomes of  
12 UK healthcare professionals as a unique professional group, due to the qualitative  
13 reports of healthcare specific (i.e. patient interaction outcomes) in the literature  
14 (9,25). We found that six of the outcome statements included in the MOVEiT tool  
15 were specific to healthcare professionals (i.e. I am confident in my ability to manage  
16 myself in a clinical environment). However, if one were to reduce the health specificity  
17 of the wording (for example, change the word clinical to work, or patient to customer)  
18 the tool has similarities to other psychometric measures introduced earlier in this  
19 paper (21,22). These similarities provide support for the application of all measures  
20 and suggest that MOVEiT could be applicable outside of healthcare.  
21  
22  
23  
24  
25  
26  
27  
28

29 The 40 outcome statements that we found to have the best psychometric properties  
30 fell within the main outcome categories reported in past literature. For example,  
31 communication, leadership, attitude to work, cultural awareness are frequently  
32 reported outcomes in the literature and domains within this tool (2,6,9,12,18). In our  
33 previous work we criticise the current evidence base for being too vague in outcome  
34 reporting, as many papers report communication, leadership and cultural awareness  
35 as broad outcomes, rather than specify the relevant components within each that  
36 develop (specific skills, knowledge or attitudes) (2,5,12). By using psychometric tests  
37 to assess latent traits, we further highlight the necessity for specific outcome  
38 reporting, as we found outcome statements associated with adapting communication  
39 and difficult communication to be two unique latent traits, rather than a single entity.  
40  
41  
42  
43  
44  
45  
46  
47  
48

49 We hope that any healthcare professionals as individuals, project managers, or NHS  
50 trusts may choose to use the tool in both a within or between participant manner  
51 (comparing outcomes pre and post international placements and comparing staff  
52 with and without international experience). By collecting data using the MOVEiT tool  
53 and the variable statements developed in our previous work (to assess moderating  
54 or mediating variables that may affect outcomes), future researchers could begin to  
55 gather precise information about this learning (process, outcomes, variables) (5).  
56  
57  
58  
59  
60

1  
2  
3 This should also be considered against measures of the list of costs reported in our  
4 previous work (5), as there is considerable literature regarding the ethical concerns  
5 of medical practice in LMICs, particularly when staff practice skills that they could not  
6 in a high income country (42,43). If mutual benefits could be evidenced using  
7 metrics, and costs minimised/mitigated by assessing the elements that increase  
8 mutual benefits, employers may be less reluctant to release staff to undertake such  
9 work (1,6). Particularly is evidence suggests that such work, may be beneficial for  
10 the LMIC, the NHS and the individual professional.  
11  
12  
13  
14  
15  
16

17  
18 Going forward we hope to develop a larger set of data; which will a) help us  
19 understand in more detail the processes associated with the outcomes and b)  
20 assess more thoroughly the reliability and validity of the tool c) adapt or reduce the  
21 tool further based on future data and d) assess sensitivity of the tool to change.  
22  
23  
24  
25  
26

## 27 **Limitations**

28  
29 The tool only includes items which are either psychometrically related, or show  
30 variability of response. This means that many items that stakeholders considered  
31 important for inclusion in the core outcome set were not represented within the tool  
32 (5). This tool, therefore, compliments rather than replaces other tools which  
33 professionals to reflect on all components of their PPD (19). This tool provides a way  
34 of evidencing benefits, however there is a body of critical evidence outlining the  
35 ethical concerns of medical practice abroad, particularly when individuals practice in  
36 ways that they might not in a high-income country (43,44). A full cost-benefit analysis  
37 of this phenomena can be found in the authors other work (15), the authors only  
38 advocate benefits in mutually-beneficial, sustainable, ethical placements.  
39  
40  
41  
42  
43  
44  
45  
46  
47

## 48 **Conclusion**

49  
50 This evidence-based 40-item psychometric tool for self-assessment of outcomes  
51 from international placements (MOVEit) could be used in research and practice.  
52 Future work will reveal if the tool has the sensitivity to detect change in the domains.  
53  
54  
55

## 56 **Ethics**

Ethical approval was granted via the University of Salford (ref HSCR14/58) and the University of Manchester Research Ethics Committee (ref 14185).

### **List of Abbreviations**

CFA- Confirmatory Factor Analysis

GHE- Global Health Exchange

HEE- Health Education England

HCA- Healthcare Assistant

HIC- High Income Country

LMIC- Low and Middle-income Country

MIRT- Multivariate Item Response Theory

NHS- National Health Service

NHSNW- National Health Service North West

PCA- Principle Component analysis

PPD- Personal and Professional Development

SWLS- Satisfaction with Life Scale

### **Declarations**

#### **Ethics approval and consent to participate**

Approval for the study was obtained from the Ethical Research Committee, University of Salford, and the University of Manchester Research Ethics Committee. Participants gave informed consent.



## Consent for publication

Not applicable

## Availability of data and material

The datasets used and/or analysed during the current study are available from the corresponding author on reasonable request.

## Competing interests

Professor Ged Byrne is the Director of Global Engagement for Health Education England. The other authors declare no competing interests.

## Funding

This work was supported by a project development grant from Health Education England (HEE), through the Global Health Exchange (GHE). Grant ref. NURA54

## Author contributions

NT participated in the design of the study, conducted the pilot and drafted the majority of the manuscript. LBD conceived the design of the study, analysed data and contributed significantly to drafting the manuscript. CC provided oversight to the study design, conducted the PCA and statistical analysis and drafted the manuscript, GB provided oversight of study design, helped recruit participants and drafted the manuscript. All authors participated in the coordination of the research and read and approved the final manuscript.

## Acknowledgements

1  
2  
3 We would like to thank Anya Ahmed, Louise Ackers, Natalie Tate, Eileen  
4  
5 Cunningham, John Chatwin, Hassan Osman and James Ackers-Johnson for being  
6  
7 involved in the wider MOVE project.  
8  
9

10 We would like to thank all of the stakeholders and participant groups involved for  
11  
12 their significant contribution of time and effort.  
13  
14

15  
16 The full title of the study from which this analysis was derived was: Measuring the  
17  
18 outcomes of volunteering for education (MOVE). The study was funded by Health Education  
19  
20 England (Global Health Exchange). The research team were independent from the funding  
21  
22 agency. The views expressed in this publication are those of the authors and not  
23  
24 necessarily those of Health Education England or the Department of Health  
25  
26  
27  
28  
29  
30

### 31 **References**

- 32  
33  
34 1. Crisp N. Mutual learning and reverse innovation--where next? Global Health  
35 [Internet]. 2014 Jan [cited 2014 Aug 4];10(1):14. Available from:  
36 <http://www.pubmedcentral.nih.gov/articlerender.fcgi?artid=3986825&tool=pmc>  
37 <http://www.pubmedcentral.nih.gov/articlerender.fcgi?artid=3986825&tool=pmc>  
38 [entrez&rendertype=abstract](http://www.pubmedcentral.nih.gov/articlerender.fcgi?artid=3986825&tool=pmc)  
39  
40  
41 2. Sikka N. All aboard with Impact India. Br Dent J [Internet]. 2009 Oct 24 [cited  
42 2016 May 19];207(8):401–3. Available from:  
43 <http://www.ncbi.nlm.nih.gov/pubmed/19851412>  
44  
45  
46  
47 3. Wood JB, Hills E, Keto FJ. Hands across the equator: the Hereford-Muheza  
48 link eight years on. BMJ [Internet]. 1994 Apr 16 [cited 2015 Jul  
49 22];308(6935):1029–32. Available from:  
50 <http://www.pubmedcentral.nih.gov/articlerender.fcgi?artid=2539885&tool=pmc>  
51 [entrez&rendertype=abstract](http://www.pubmedcentral.nih.gov/articlerender.fcgi?artid=2539885&tool=pmc)  
52  
53  
54  
55  
56  
57 4. Kosack CS. Experience of Médecins Sans Frontières in laboratory medicine in  
58 resource-limited settings. Clin Chem Lab Med [Internet]. 2012 Jul 1 [cited 2019  
59  
60

- 1  
2  
3 Apr 25];50(7):1221–7. Available from:  
4 <https://www.degruyter.com/view/j/cclm.2012.50.issue-7/cclm-2011-0618/cclm->  
5 [2011-0618.xml](https://www.degruyter.com/view/j/cclm.2012.50.issue-7/cclm-2011-0618/cclm-2011-0618.xml)  
6  
7  
8  
9  
10 5. Tyler N, Chatwin J, Byrne G, Hart J, Byrne-Davis LMT. The benefits of  
11 International volunteering in a low-resource setting: Development of a core  
12 outcome set.  
13  
14  
15 6. Jones FA, Knights DP, Sinclair VF, Baraitser P. Do health partnerships with  
16 organisations in lower income countries benefit the UK partner? *Global Health*  
17 [Internet]. 2013;9(1):38. Available from:  
18 <http://www.pubmedcentral.nih.gov/articlerender.fcgi?artid=3766651&tool=pmc>  
19 [entrez&rendertype=abstract](http://www.pubmedcentral.nih.gov/articlerender.fcgi?artid=3766651&tool=pmc)  
20  
21  
22  
23  
24 7. Abell C, Taylor S. The NHS benefits from doctors working abroad. *BMJ*  
25 [Internet]. 1995 Jul 8 [cited 2015 Nov 16];311(6997):133–4. Available from:  
26 <http://www.bmj.com/content/311/6997/133>  
27  
28  
29  
30 8. Kiernan P, O’Dempsey T, Kwalombota K, Elliott L, Cowan L. Evaluation of  
31 effect on skills of GP trainees taking time out of programme (OOP) in  
32 developing countries. *Educ Prim Care* [Internet]. 2014 Mar [cited 2015 Jul  
33 22];25(2):78–83. Available from:  
34 <http://www.ncbi.nlm.nih.gov/pubmed/24593970>  
35  
36  
37  
38  
39 9. Norton D, Marks-Maran D. Developing cultural sensitivity and awareness in  
40 nursing overseas. *Nurs Stand* [Internet]. 2014 Jul 2 [cited 2016 Jan  
41 28];28(44):39–43. Available from:  
42 <http://www.ncbi.nlm.nih.gov/pubmed/24985303>  
43  
44  
45  
46  
47 10. Standage R, Randall D. The benefits for children’s nurses of overseas  
48 placements: where is the evidence? *Issues Compr Pediatr Nurs* [Internet].  
49 2014 Jun [cited 2015 Jul 22];37(2):87–102. Available from:  
50 <http://www.ncbi.nlm.nih.gov/pubmed/24495156>  
51  
52  
53  
54  
55 11. Hockey P, Tobin A, Kemp J, Kerrigan J, Kitsell F, Green P, et al. Global health  
56 partnerships: leadership development for a purpose. Vol. 22, *Leadership in*  
57 *Health Services*. 2009. p. 306–16.  
58  
59  
60

- 1  
2  
3 12. Dean E. "Tanzania changed me". *Nurs Stand* [Internet]. 2013 [cited 2014 Dec  
4 29];27(52):16–7. Available from:  
5  
6 <http://www.ncbi.nlm.nih.gov/pubmed/23980965>  
7  
8
- 9 13. Lumb A, Murdoch-Eaton D. Electives in undergraduate medical education:  
10 AMEE Guide No. 88. *Med Teach* [Internet]. 2014;36:557–72. Available from:  
11 <http://www.ncbi.nlm.nih.gov/pubmed/24787526>  
12  
13
- 14 14. Button L, Green B, Tengnah C, Johansson I, Baker C. The impact of  
15 international placements on nurses' personal and professional lives: literature  
16 review. *J Adv Nurs* [Internet]. 2005 May [cited 2015 Jun 9];50(3):315–24.  
17 Available from: <http://www.ncbi.nlm.nih.gov/pubmed/15811111>  
18  
19
- 20 15. Ackers HL, Ackers-Johnson J, Chatwin J, Tyler N. *Healthcare, Frugal  
21 Innovation, and Professional Voluntarism* [Internet]. Cham: Springer  
22 International Publishing; 2017 [cited 2017 May 25]. Available from:  
23 <http://link.springer.com/10.1007/978-3-319-48366-5>  
24  
25
- 26 16. Tropical Health Education Trust. In our mutual interest [Internet]. 2017.  
27 Available from: [https://www.thet.org/wp-content/uploads/2017/08/In-Our-  
28 Mutual-Interest.pdf](https://www.thet.org/wp-content/uploads/2017/08/In-Our-Mutual-Interest.pdf)  
29  
30
- 31 17. Crisp N. *Turning the world upside down : the search for global health in the  
32 twenty-first century*. Royal Society of Medicine Press; 2010. 228 p.  
33  
34
- 35 18. Wright J, Walley J, Philip A, Petros H, Ford H. *Research into practice: 10 years  
36 of international public health partnership between the UK and Swaziland*. *J  
37 Public Health (Oxf)*. 2010;32:277–82.  
38  
39
- 40 19. Longstaff B. *Toolkit for the collection of evidence of knowledge and skills  
41 gained through participation in an international health project*.  
42  
43
- 44 20. Smith C, Pettigrew LM, Seo H-N, Dorward J. *Combining general practice with  
45 international work: online survey of experiences of UK GPs*. Vol. 3, *JRSM  
46 Short Reports*. 2012. p. 46–46.  
47  
48
- 49 21. Lough BJ, McBride AM, Sherraden MS. *Measuring Volunteer Outcomes  
50 Development of the International Volunteer Impacts Survey Measuring*  
51  
52  
53  
54  
55  
56  
57  
58  
59  
60

- 1  
2  
3 Volunteer Outcomes: Development of the International Volunteer Impacts  
4 Survey. Online. 2009.  
5  
6  
7  
8 22. Hammer MR, Bennett MJ, Wiseman R. Measuring intercultural sensitivity: The  
9 intercultural development inventory. *Int J Intercult Relations*. 2003;27:421–43.  
10  
11  
12 23. Braskamp L, Braskamp D, January KM-R, 2008 undefined. Global  
13 Perspective Inventory (GPI): Its purpose, construction, potential uses, and  
14 psychometric characteristics. academia.edu [Internet]. [cited 2019 Apr 18];  
15 Available from: <http://www.academia.edu/download/44637248/manual.pdf>  
16  
17  
18  
19 24. Lough BJ, McBride AM, Sherraden MS. Perceived effects of international  
20 volunteering: Reports from alumni. St Louis, MO: Center for Social  
21 Development, Washington University. 2009.  
22  
23  
24  
25 25. Briscoe L. Becoming culturally sensitive: A painful process? *Midwifery*  
26 [Internet]. 2013 [cited 2015 Jul 22]; Available from:  
27 <http://www.sciencedirect.com/science/article/pii/S0266613811001331>  
28  
29  
30  
31 26. Streiner DL, Norman GR, Cairney J. *Health Measurement Scales* [Internet].  
32 Vol. 1. Oxford University Press; 2015 [cited 2019 Apr 18]. Available from:  
33 [http://www.oxfordmedicine.com/view/10.1093/med/9780199685219.001.0001/](http://www.oxfordmedicine.com/view/10.1093/med/9780199685219.001.0001/med-9780199685219)  
34 [med-9780199685219](http://www.oxfordmedicine.com/view/10.1093/med/9780199685219.001.0001/med-9780199685219)  
35  
36  
37  
38  
39 27. Tyler N, Chatwin J, Byrne G, Hart J, Byrne-Davis L. The benefits of  
40 international volunteering in a low-resource setting: development of a core  
41 outcome set. *Hum Resour Health* [Internet]. 2018 Dec 20 [cited 2019 Jan  
42 1];16(1):69. Available from: [https://human-resources-](https://human-resources-health.biomedcentral.com/articles/10.1186/s12960-018-0333-5)  
43 [health.biomedcentral.com/articles/10.1186/s12960-018-0333-5](https://human-resources-health.biomedcentral.com/articles/10.1186/s12960-018-0333-5)  
44  
45  
46  
47  
48 28. Wu M, Ping H, Jen T. *Educational Measurement for Applied Researchers*  
49 [Internet]. 2017 [cited 2017 May 15]. 22 p. Available from:  
50 [https://books.google.co.uk/books?id=EOHTDQAAQBAJ&pg=PA22&lpg=PA22](https://books.google.co.uk/books?id=EOHTDQAAQBAJ&pg=PA22&lpg=PA22&dq=tap+into+latent+traits&source=bl&ots=KNzd0XfZxn&sig=754d3_DYxsS8Hh2DBt_ny9h8Uf0&hl=en&sa=X&ved=0ahUKEwj-8rbsmPLTAhVIJ8AKHcFEAKoQ6AEILDAB#v=onepage&q=tap%20into%20latent%20traits&f=false)  
51 [&dq=tap+into+latent+traits&source=bl&ots=KNzd0XfZxn&sig=754d3\\_DYxsS8](https://books.google.co.uk/books?id=EOHTDQAAQBAJ&pg=PA22&lpg=PA22&dq=tap+into+latent+traits&source=bl&ots=KNzd0XfZxn&sig=754d3_DYxsS8Hh2DBt_ny9h8Uf0&hl=en&sa=X&ved=0ahUKEwj-8rbsmPLTAhVIJ8AKHcFEAKoQ6AEILDAB#v=onepage&q=tap%20into%20latent%20traits&f=false)  
52 [Hh2DBt\\_ny9h8Uf0&hl=en&sa=X&ved=0ahUKEwj-](https://books.google.co.uk/books?id=EOHTDQAAQBAJ&pg=PA22&lpg=PA22&dq=tap+into+latent+traits&source=bl&ots=KNzd0XfZxn&sig=754d3_DYxsS8Hh2DBt_ny9h8Uf0&hl=en&sa=X&ved=0ahUKEwj-8rbsmPLTAhVIJ8AKHcFEAKoQ6AEILDAB#v=onepage&q=tap%20into%20latent%20traits&f=false)  
53 [8rbsmPLTAhVIJ8AKHcFEAKoQ6AEILDAB#v=onepage&q=tap into latent](https://books.google.co.uk/books?id=EOHTDQAAQBAJ&pg=PA22&lpg=PA22&dq=tap+into+latent+traits&source=bl&ots=KNzd0XfZxn&sig=754d3_DYxsS8Hh2DBt_ny9h8Uf0&hl=en&sa=X&ved=0ahUKEwj-8rbsmPLTAhVIJ8AKHcFEAKoQ6AEILDAB#v=onepage&q=tap%20into%20latent%20traits&f=false)  
54 [traits&f=false](https://books.google.co.uk/books?id=EOHTDQAAQBAJ&pg=PA22&lpg=PA22&dq=tap+into+latent+traits&source=bl&ots=KNzd0XfZxn&sig=754d3_DYxsS8Hh2DBt_ny9h8Uf0&hl=en&sa=X&ved=0ahUKEwj-8rbsmPLTAhVIJ8AKHcFEAKoQ6AEILDAB#v=onepage&q=tap%20into%20latent%20traits&f=false)  
55  
56  
57  
58  
59  
60

- 1  
2  
3 29. Hambleton RK, Cook LL. Latent Trait Models and Their use in the Analysis of  
4 Educational Test Data. *J Educ Meas* [Internet]. 1977 Jun [cited 2017 May  
5 15];14(2):75–96. Available from: [http://doi.wiley.com/10.1111/j.1745-](http://doi.wiley.com/10.1111/j.1745-3984.1977.tb00030.x)  
6  
7 3984.1977.tb00030.x  
8  
9
- 10  
11 30. Evans DB, Murray CJL. Health systems performance assessment : debates,  
12 methods and empiricism [Internet]. World Health Organization; 2003 [cited  
13 2017 May 15]. 927 p. Available from:  
14 [https://books.google.co.uk/books?id=Ut\\_xcxWHobYC&pg=PA739&lpg=PA739](https://books.google.co.uk/books?id=Ut_xcxWHobYC&pg=PA739&lpg=PA739&dq=tap+into+latent+traits&source=bl&ots=jh4GceWRQt&sig=MwkVD0ZpHWATucLYNWJU9u3snMQ&hl=en&sa=X&ved=0ahUKEwj-8rbsmPLTAhVIJ8AKHcFEAkoQ6AEIMTAC#v=onepage&q=tap%20into%20latent%20traits&f=false)  
15 &dq=tap+into+latent+traits&source=bl&ots=jh4GceWRQt&sig=MwkVD0ZpHW  
16 ATucLYNWJU9u3snMQ&hl=en&sa=X&ved=0ahUKEwj-  
17 8rbsmPLTAhVIJ8AKHcFEAkoQ6AEIMTAC#v=onepage&q=tap into latent  
18 traits&f=false  
19  
20  
21  
22  
23  
24
- 25 31. Charter RA. Sample Size Requirements for Precise Estimates of Reliability,  
26 Generalizability, and Validity Coefficients. *J Clin Exp Neuropsychol*  
27 (Neuropsychology, Dev Cogn Sect A). 1999;  
28  
29
- 30 32. My eForms - eForms [Internet]. [cited 2017 May 19]. Available from:  
31 <https://eforms.mhs.man.ac.uk/>  
32  
33  
34  
35
- 36 33. Ericsson KA, Simon HA. How to study thinking in everyday life: Contrasting  
37 think-aloud protocols with descriptions and explanations of thinking. *Mind, Cult*  
38 *Act*. 1998;  
39  
40  
41
- 42 34. Caspar RA, Lessler JT, Willis GB. Reducing survey error through research on  
43 the cognitive and decision processes in surveys. Short course Present 1999  
44 Meet Am Stat Assoc. 1999;  
45  
46  
47
- 48 35. Diener E, Emmons RA, Larsen RJ, Griffin S. The Satisfaction With Life Scale.  
49 *J Pers Assess* [Internet]. 1985 Feb 10 [cited 2014 Dec 6];49(1):71–5. Available  
50 from: [http://www.tandfonline.com/doi/abs/10.1207/s15327752jpa4901\\_13](http://www.tandfonline.com/doi/abs/10.1207/s15327752jpa4901_13)  
51  
52  
53
- 54 36. Leung W. How to design a questionnaire. *Student BMJ* [Internet]. 2001 [cited  
55 2016 Mar 31];9(11):187–9. Available from:  
56 [http://mail.cochrane.es/files/Recursos/How\\_to\\_design\\_a\\_questionnaire.pdf](http://mail.cochrane.es/files/Recursos/How_to_design_a_questionnaire.pdf)  
57  
58  
59
- 60 37. IBM Corp. IBM SPSS Statistics for Macintosh, Version 24.0. 2016. 2016;

- 1
- 2
- 3 38. Osteen P. An Introduction to Using Multidimensional Item Response Theory to
- 4 Assess Latent Factor Structures. J Soc Social Work Res. 2010;
- 5
- 6
- 7 39. Liang X, Yang Y. An evaluation of WLSMV and Bayesian methods for
- 8 confirmatory factor analysis with categorical indicators. Int J Quant Res Educ.
- 9 2014;
- 10
- 11
- 12
- 13 40. Muthén L, Muthén B. Mplus user's guide (8th ed.). Los Angeles: Author. 2017.
- 14
- 15
- 16 41. Electronic Staff Record Programme Data Warehouse. North West Staff in post.
- 17 2013.
- 18
- 19
- 20 42. Dowell J, Blacklock C, Liao C, Merrylees N. Boost or burden? Issues posed by
- 21 short placements in resource-poor settings. Br J Gen Pract [Internet]. 2014 Jun
- 22 1 [cited 2015 Mar 4];64(623):272–3. Available from:
- 23 <http://bjgp.org/content/64/623/272.abstract>
- 24
- 25
- 26
- 27
- 28 43. Banatvala N, Doyal L. Knowing when to say “no” on the student elective.
- 29 Students going on electives abroad need clinical guidelines. BMJ [Internet].
- 30 1998 May 9 [cited 2016 Apr 27];316(7142):1404–5. Available from:
- 31 <http://www.pubmedcentral.nih.gov/articlerender.fcgi?artid=1113113&tool=pmc>
- 32 <http://www.pubmedcentral.nih.gov/articlerender.fcgi?artid=1113113&tool=pmc>
- 33 [entrez&rendertype=abstract](http://www.pubmedcentral.nih.gov/articlerender.fcgi?artid=1113113&tool=pmc)
- 34
- 35
- 36
- 37 44. Dowell J, Merrylees N. Electives: Isn't it time for a change? Med Educ.
- 38 2009;43:121–6.
- 39
- 40
- 41
- 42
- 43
- 44
- 45
- 46

47 **Table 6: Estimated discrimination parameters from the proposed MIRT**  
48 **model**  
49

| Constructs / Items                                                        | Estimate | S.E.  | P-Value (two-tailed) |
|---------------------------------------------------------------------------|----------|-------|----------------------|
| <b>CONFIDENCE</b>                                                         |          |       |                      |
| I am confident in my ability to manage myself in a clinical environment.  | 0.727    | 0.030 | 0.000                |
| I am confident in my abilities to work independently when necessary.      | 0.719    | 0.032 | 0.000                |
| I am confident in my ability to deal with the unexpected.                 | 0.743    | 0.025 | 0.000                |
| I am confident in my ability to be adaptable and innovative as a leader.  | 0.733    | 0.024 | 0.000                |
| I am confident in my ability to adapt and be flexible clinically.         | 0.823    | 0.021 | 0.000                |
| I am confident in my ability to adapt and be flexible in general.         | 0.798    | 0.021 | 0.000                |
| I am confident in my ability to find solutions despite limited resources. | 0.770    | 0.022 | 0.000                |
| I am confident in my ability to apply clinical skills to another context. | 0.721    | 0.026 | 0.000                |
| I am confident in my work.                                                | 0.724    | 0.025 | 0.000                |
| <b>LIFE SATISFACTION</b>                                                  |          |       |                      |
| In most ways my life is close to my ideal.                                | 0.834    | 0.02  | 0.000                |
| The conditions of my life are excellent.                                  | 0.783    | 0.02  | 0.000                |
| I am satisfied with my life.                                              | 0.893    | 0.017 | 0.000                |
| So far I have gotten the important things I want in life.                 | 0.776    | 0.024 | 0.000                |
| If I could live my life over. I would change almost nothing.              | 0.667    | 0.029 | 0.000                |
| Taking everything into consideration. I am satisfied with my job.         | 0.717    | 0.038 | 0.000                |



| Constructs / Items                                                                                                        | Estimate | S.E.  | P-Value<br>(two-tailed) |
|---------------------------------------------------------------------------------------------------------------------------|----------|-------|-------------------------|
| <b>CULTURAL</b>                                                                                                           |          |       |                         |
| *I demonstrated a good awareness about how culture influences health.                                                     | 0.761    | 0.036 | 0.000                   |
| *I frequently demonstrated cultural sensitivity.                                                                          | 0.881    | 0.031 | 0.000                   |
| *I was constantly conscious of culture when working with patients.                                                        | 0.779    | 0.033 | 0.000                   |
| <b>ADAPTING COMMUNICATION</b>                                                                                             |          |       |                         |
| *I changed the way I speak so that somebody can understand me (e.g. purposely spoke slower and clearer).                  | 0.899    | 0.024 | 0.000                   |
| *I changed the way I communicate to make it more contextually appropriate (e.g.. to make it more culturally appropriate). | 0.916    | 0.025 | 0.000                   |
| *I frequently relied on my non-verbal communication (e.g. hand gestures).                                                 | 0.751    | 0.032 | 0.000                   |
| <b>TEACHING</b>                                                                                                           |          |       |                         |
| *I demonstrated I'm a good teacher.                                                                                       | 0.813    | 0.024 | 0.000                   |
| *I adapted the way I teach to make it better for the learner.                                                             | 0.807    | 0.023 | 0.000                   |
| I am confident in my ability to teach others.                                                                             | 0.883    | 0.031 | 0.000                   |
| <b>DIFFICULT COMMUNICATION</b>                                                                                            |          |       |                         |
| *I demonstrated that I am skilled in challenging conversations. even in high pressure situations.                         | 0.842    | 0.025 | 0.000                   |
| *I demonstrated that I am able to manage difficult people effectively.                                                    | 0.862    | 0.021 | 0.000                   |
| *I frequently dealt with difficult people.                                                                                | 0.774    | 0.027 | 0.000                   |

| Constructs / Items                                                                                     | Estimate | S.E.  | P-Value (two-tailed) |
|--------------------------------------------------------------------------------------------------------|----------|-------|----------------------|
| <b>BEHAVIOUR CHANGE</b>                                                                                |          |       |                      |
| I am able to empower patients to help themselves.                                                      | 0.807    | 0.026 | 0.000                |
| I am able to empower colleagues to help themselves.                                                    | 0.794    | 0.025 | 0.000                |
| In my work I have demonstrated skills in changing colleagues' behaviour.                               | 0.761    | 0.027 | 0.000                |
| In my work I have demonstrated skills in encouraging and supporting patients to change behaviour.      | 0.778    | 0.027 | 0.000                |
| <b>MANAGEMENT</b>                                                                                      |          |       |                      |
| *I allocated tasks.                                                                                    | 0.848    | 0.021 | 0.000                |
| *I co-ordinated colleagues.                                                                            | 0.868    | 0.02  | 0.000                |
| *I demonstrated I am able to plan and organise.                                                        | 0.907    | 0.024 | 0.000                |
| <b>ATTITUDE TO WORK</b>                                                                                |          |       |                      |
| *I was frequently proactive at work (e.g. used my initiative. got on with things. thought on my feet). | 0.778    | 0.027 | 0.000                |
| *I demonstrated that I am able to cope in work (e.g. able to deal with stress).                        | 0.763    | 0.028 | 0.000                |
| *I demonstrated that I am particularly good at working as part of team.                                | 0.765    | 0.026 | 0.000                |
| <b>FLEXIBILITY</b>                                                                                     |          |       |                      |
| *I demonstrated I'm good at dealing with the unexpected.                                               | 0.857    | 0.037 | 0.000                |
| *I frequently had to find solutions despite limited resources.                                         | 0.912    | 0.017 | 0.000                |
| *I demonstrated I am able to find solutions despite limited resources.                                 | 0.937    | 0.017 | 0.000                |

1  
2  
3 \*items preceded by \* indicate that 'In the last month' is presented ahead of that  
4 statement, providing a time reference to consider the experience.  
5  
6  
7

## 8 **List of Figures**

9  
10 Figure 1: Scree Plot

11  
12 Figure 2: Latent variables and loadings

13  
14 Figure 3: Estimates for mean individual precision of the latent variable scores.

15  
16 Figure 4: Information functions for the latent variables.

17  
18 Figure 5: Estimates for individual standard errors of measurement of the latent  
19 variable scores.  
20  
21  
22  
23  
24  
25  
26

## 27 **List of Tables**

28  
29 Table 1: Participants: Anticipated and Actual Numbers

30  
31 Table 2: Professions of participants

32  
33 Table 3: Participant Demographic Information: age, employment status, nationality,  
34 gender and career stage (years since registration)  
35  
36

37  
38 Table 4: Comparison of selected goodness-of-fit indices between the unidimensional  
39 model and the proposed model.  
40  
41

42 Table 5: Cronbach's alpha co-efficient for each construct

43  
44 Table 6: The final selection of items with the dimension each one of them belongs, the  
45 loading estimates, the standard errors of the loading estimates, the ratios between the  
46 estimate and the standard error and the two-tailed  $p$ -values for the estimates.  
47  
48  
49  
50  
51  
52  
53  
54  
55  
56  
57  
58  
59  
60

1  
2  
3  
4  
5  
6  
7  
8  
9  
10  
11  
12  
13  
14  
15  
16  
17  
18  
19  
20  
21  
22  
23  
24  
25  
26  
27  
28  
29  
30  
31  
32  
33  
34  
35  
36  
37  
38  
39  
40  
41  
42  
43  
44  
45  
46  
47  
48  
49  
50  
51  
52  
53  
54  
55  
56  
57  
58  
59  
60

Scree Plot



Scree Plot

1  
2  
3  
4  
5  
6  
7  
8  
9  
10  
11  
12  
13  
14  
15  
16  
17  
18  
19  
20  
21  
22  
23  
24  
25  
26  
27  
28  
29  
30  
31  
32  
33  
34  
35  
36  
37  
38  
39  
40  
41  
42  
43  
44  
45  
46  
47  
48  
49  
50  
51  
52  
53  
54  
55  
56  
57  
58  
59  
60



Latent variables and loadings



Estimates for mean individual precision of the latent variable scores

1  
2  
3  
4  
5  
6  
7  
8  
9  
10  
11  
12  
13  
14  
15  
16  
17  
18  
19  
20  
21  
22  
23  
24  
25  
26  
27  
28  
29  
30  
31  
32  
33  
34  
35  
36  
37  
38  
39  
40  
41  
42  
43  
44  
45  
46  
47  
48  
49  
50  
51  
52  
53  
54  
55  
56  
57  
58  
59  
60



Information functions for the latent variables

1  
2  
3  
4  
5  
6  
7  
8  
9  
10  
11  
12  
13  
14  
15  
16  
17  
18  
19  
20  
21  
22  
23  
24  
25  
26  
27  
28  
29  
30  
31  
32  
33  
34  
35  
36  
37  
38  
39  
40  
41  
42  
43  
44  
45  
46  
47  
48  
49  
50  
51  
52  
53  
54  
55  
56  
57  
58  
59  
60

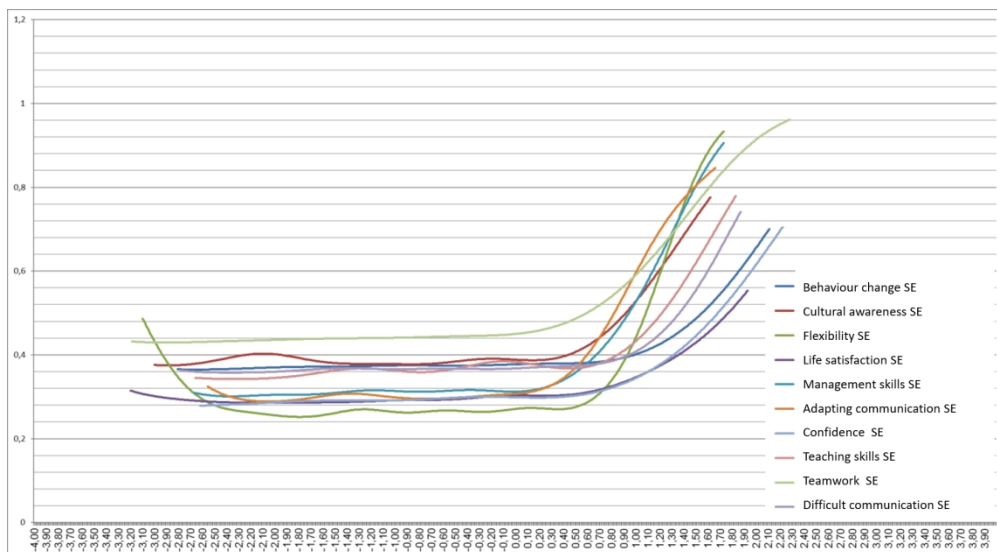

Estimates for individual standard errors of measurement of the latent variable scores



## **Additional Files: Tables**

### **Table 1: Each core outcome and how it was used in the tool**

| CORE OUTCOME                                                                                                                                                                                                                                                                    | INCLUDE/REMOVE/COMBINE | Reason/changed to/combined into                                                                                                |
|---------------------------------------------------------------------------------------------------------------------------------------------------------------------------------------------------------------------------------------------------------------------------------|------------------------|--------------------------------------------------------------------------------------------------------------------------------|
| INCREASED AWARENESS OF/KNOWLEDGE ABOUT CULTURAL DIFFERENCES AND SIMILARITIES (e.g., understanding key issues within a culture, culturally acceptable behaviour and cultures of UK immigrants, learning about, accepting and changing assumptions about other cultures)          | COMB                   | I have demonstrated a good awareness about how cultural differences influence health                                           |
| INCREASED AWARENESS OF/KNOWLEDGE ABOUT THE CULTURAL ASPECTS OF HEALTH (e.g., greater understanding of health promotion, how culture affects daily life and professional work, cultural differences in health, the effects of politics on health, sustainable healthcare)        | COMB                   | I have demonstrated a good awareness about how cultural differences influence health                                           |
| ABILITY TO WORK WITH LIMITED RESOURCES (e.g., being more resourceful, ability to target resources, ability to find solutions despite limited resources, making use of everything available, ability to work without reliance on technology, manage in a low resource setting)   | COMB                   | I have frequently had to find solutions despite limited resources                                                              |
| INCREASED AWARENESS OF/KNOWLEDGE ABOUT CULTURE IN PRACTICAL ASSESSMENTS (e.g., the importance of collecting relevant cultural information about people's presenting health problems and learning how to conduct cultural assessments and culturally based physical assessments) | INC                    |                                                                                                                                |
| ABILITY TO APPLY CLINICAL SKILLS TO ANOTHER CONTEXT (e.g., a more challenging environment or a low resource setting)                                                                                                                                                            | INC                    |                                                                                                                                |
| ABILITY TO BE ADAPTABLE AND INNOVATIVE IN TEACHING (e.g., ability to transfer skills and knowledge to the most influential people or to another context, recognising different learning styles, being adaptable in assessment)                                                  | INC                    |                                                                                                                                |
| INCREASED AWARENESS OF/KNOWLEDGE ABOUT HOW OTHER HEALTHCARE SYSTEMS FUNCTION (e.g., developed insight into disparities within healthcare systems, understanding of other systems)                                                                                               | INC                    |                                                                                                                                |
| ABILITY TO COPE (e.g., improved coping strategies, ability to deal with lack of structure, knock backs and stress, being unfazed by things and taking things in stride, new approach to guilt for patients problems)                                                            | INC                    |                                                                                                                                |
| INCREASED CULTURAL SENSITIVITY (e.g., sensitivity to reasoning behind cultural differences, feelings of minority and language barriers)                                                                                                                                         | COMB                   | I have frequently demonstrated cultural sensitivity (e.g. understanding that words and behaviours can have different meanings) |
| UNDERSTANDING THAT WORDS AND BEHAVIOURS CAN HAVE DIFFERENT MEANINGS (e.g., understanding how words are perceived by others, understanding how to speak and behave so as not offend people)                                                                                      | COMB                   | I have frequently demonstrated cultural sensitivity (e.g. understanding that words and behaviours can have different meanings) |



|    |                                                                                                                                                                                                                                                         |      |                                                                                                                   |
|----|---------------------------------------------------------------------------------------------------------------------------------------------------------------------------------------------------------------------------------------------------------|------|-------------------------------------------------------------------------------------------------------------------|
| 1  | INCREASED SELF-AWARENESS (e.g., understanding own skills and limitations, how to challenge own beliefs and importance of reflecting on own situation)                                                                                                   | INC  |                                                                                                                   |
| 2  |                                                                                                                                                                                                                                                         |      |                                                                                                                   |
| 3  |                                                                                                                                                                                                                                                         |      |                                                                                                                   |
| 4  | PATIENCE AND TOLERANCE (e.g., accepting and working at other peoples pace, more tolerant)                                                                                                                                                               | INC  |                                                                                                                   |
| 5  |                                                                                                                                                                                                                                                         |      |                                                                                                                   |
| 6  | PROACTIVITY (e.g., thinking on feet, using initiative, efficiency, get on with things rather than look for someone to blame)                                                                                                                            | INC  |                                                                                                                   |
| 7  |                                                                                                                                                                                                                                                         |      |                                                                                                                   |
| 8  | ABILITY TO WORK WITH RESOURCES AVAILABLE IN SPECIFIC CONTEXTS (i.e., understanding the reasons behind lack of resources)                                                                                                                                | COMB | I have frequently had to find solutions despite limited resources                                                 |
| 9  |                                                                                                                                                                                                                                                         |      |                                                                                                                   |
| 10 | ABILITY TO WORK TOWARDS SOLUTIONS (e.g., solution focused approach)                                                                                                                                                                                     | INC  |                                                                                                                   |
| 11 |                                                                                                                                                                                                                                                         |      |                                                                                                                   |
| 12 | UNDERSTANDING THAT SPEED AND LANGUAGE COMPETENCY AFFECT COMMUNICATION (e.g., awareness of how speed affects comprehension, understanding language differences and checking recipient comprehension, ability to use an interpreter)                      | INC  |                                                                                                                   |
| 13 |                                                                                                                                                                                                                                                         |      |                                                                                                                   |
| 14 | INCREASED AWARENESS OF/KNOWLEDGE ABOUT THE IMPORTANCE OF COMMUNITY PARTICIPATION IN HEALTH (e.g., understanding the community and social influences on health, the role of the community in health, public health and the importance of community work) | INC  |                                                                                                                   |
| 15 |                                                                                                                                                                                                                                                         |      |                                                                                                                   |
| 16 | ABILITY TO USE A BROADER RANGE OF CLINICAL SKILLS (e.g., enhancing existing skills and acquiring new clinical skills, greater all round competence)                                                                                                     | INC  |                                                                                                                   |
| 17 |                                                                                                                                                                                                                                                         |      |                                                                                                                   |
| 18 | UNDERSTANDING THAT CHANGING BEHAVIOUR IS COMPLEX (e.g., understanding how to make small changes and not to force your perspective onto others,)                                                                                                         | COMB | In my work I have demonstrated skills in changing patients' or colleagues' behaviours                             |
| 19 |                                                                                                                                                                                                                                                         |      |                                                                                                                   |
| 20 | ABILITY TO IMPROVE SERVICE (e.g., renewed enthusiasm for service improvement)                                                                                                                                                                           | INC  |                                                                                                                   |
| 21 |                                                                                                                                                                                                                                                         |      |                                                                                                                   |
| 22 | INCREASED STAFF KNOWLEDGE AND SKILLS (e.g., increased staff knowledge of low cost healthcare, more knowledgeable staff able to cover more areas, to discover better ways of doing things and more aware of waste reduction)                             | REM  | too vague and not based on individual                                                                             |
| 23 |                                                                                                                                                                                                                                                         |      |                                                                                                                   |
| 24 | INCREASED AWARENESS OF/KNOWLEDGE ABOUT HOW CONTEXT AFFECTS COMMUNICATION (e.g., effectively conveying ideas in a contextually appropriate way)                                                                                                          | INC  |                                                                                                                   |
| 25 |                                                                                                                                                                                                                                                         |      |                                                                                                                   |
| 26 | INCREASED AWARENESS OF/KNOWLEDGE ABOUT THE NEED FOR AND IMPORTANCE OF TRAINING (i.e., understanding how important effective training is in)                                                                                                             | INC  |                                                                                                                   |
| 27 |                                                                                                                                                                                                                                                         |      |                                                                                                                   |
| 28 | IMPROVEMENT IN TEACHING SKILLS (e.g., learning new techniques, greater training delivery skills, lecturing skills and small group teaching skills)                                                                                                      | COMB | In the last month I have demonstrated that I'm a good teacher<br><br>I am confident in my ability to teach others |
| 29 |                                                                                                                                                                                                                                                         |      |                                                                                                                   |
| 30 | ABILITY TO DEAL WITH THE UNEXPECTED                                                                                                                                                                                                                     | INC  |                                                                                                                   |
| 31 |                                                                                                                                                                                                                                                         |      |                                                                                                                   |
| 32 | ABILITY TO MANAGE PROJECTS                                                                                                                                                                                                                              | INC  |                                                                                                                   |
| 33 |                                                                                                                                                                                                                                                         |      |                                                                                                                   |
| 34 | DEEPER ENGAGEMENT WITH ISSUES OF EQUALITY AND DIVERSITY                                                                                                                                                                                                 | INC  |                                                                                                                   |
| 35 |                                                                                                                                                                                                                                                         |      |                                                                                                                   |
| 36 | ABILITY TO OVERCOME COMMUNICATION CHALLENGES (e.g., ability to communicate effectively in high pressure situations, engage in challenging conversations and liaise between groups)                                                                      | INC  |                                                                                                                   |
| 37 |                                                                                                                                                                                                                                                         |      |                                                                                                                   |
| 38 | ABILITY TO BE INNOVATIVE WITH CLINICAL SKILLS (e.g., use of innovative techniques, finding new ways to approach a condition, new ways of working)                                                                                                       | INC  |                                                                                                                   |
| 39 |                                                                                                                                                                                                                                                         |      |                                                                                                                   |
| 40 |                                                                                                                                                                                                                                                         |      |                                                                                                                   |
| 41 |                                                                                                                                                                                                                                                         |      |                                                                                                                   |
| 42 |                                                                                                                                                                                                                                                         |      |                                                                                                                   |
| 43 |                                                                                                                                                                                                                                                         |      |                                                                                                                   |
| 44 |                                                                                                                                                                                                                                                         |      |                                                                                                                   |
| 45 |                                                                                                                                                                                                                                                         |      |                                                                                                                   |
| 46 |                                                                                                                                                                                                                                                         |      |                                                                                                                   |
| 47 |                                                                                                                                                                                                                                                         |      |                                                                                                                   |
| 48 |                                                                                                                                                                                                                                                         |      |                                                                                                                   |
| 49 |                                                                                                                                                                                                                                                         |      |                                                                                                                   |
| 50 |                                                                                                                                                                                                                                                         |      |                                                                                                                   |
| 51 |                                                                                                                                                                                                                                                         |      |                                                                                                                   |
| 52 |                                                                                                                                                                                                                                                         |      |                                                                                                                   |
| 53 |                                                                                                                                                                                                                                                         |      |                                                                                                                   |
| 54 |                                                                                                                                                                                                                                                         |      |                                                                                                                   |
| 55 |                                                                                                                                                                                                                                                         |      |                                                                                                                   |
| 56 |                                                                                                                                                                                                                                                         |      |                                                                                                                   |
| 57 |                                                                                                                                                                                                                                                         |      |                                                                                                                   |
| 58 |                                                                                                                                                                                                                                                         |      |                                                                                                                   |
| 59 |                                                                                                                                                                                                                                                         |      |                                                                                                                   |
| 60 |                                                                                                                                                                                                                                                         |      |                                                                                                                   |

|    |                                                                                                                                                                                                                             |      |                                                                                 |
|----|-----------------------------------------------------------------------------------------------------------------------------------------------------------------------------------------------------------------------------|------|---------------------------------------------------------------------------------|
| 1  | APPRECIATION OF HAVING THE RIGHT TOOLS AND EQUIPMENT TO BE ABLE TO DO THE JOB (i.e., resources: technical equipment, disposal equipment, cleaning products and protective equipment)                                        | COMB | I have frequently had to find solutions despite limited resources               |
| 2  |                                                                                                                                                                                                                             |      |                                                                                 |
| 3  | APPRECIATION OF EXCELLENT HUMAN RESOURCE IN THE NHS (e.g., multidisciplinary TEAM WORKs, HR structures, appreciation of own profession, understanding hierarchy and the importance of each person within it)                | INC  |                                                                                 |
| 4  |                                                                                                                                                                                                                             |      |                                                                                 |
| 5  | IMPROVED EMOTIONAL INTELLIGENCE (e.g., changed engagement with self, knowledge and world)                                                                                                                                   | INC  |                                                                                 |
| 6  |                                                                                                                                                                                                                             |      |                                                                                 |
| 7  | ABILITY TO IDENTIFY AND ANTICIPATE POTENTIAL PROBLEMS (e.g., identify problems when setting up a new project)                                                                                                               | INC  |                                                                                 |
| 8  |                                                                                                                                                                                                                             |      |                                                                                 |
| 9  | INCREASED AWARENESS OF/KNOWLEDGE ABOUT APPROPRIATE CLINICAL BEHAVIOUR (e.g., knowing when to stop and when to move forward, when to ask for help and different populations needs)                                           | INC  |                                                                                 |
| 10 |                                                                                                                                                                                                                             |      |                                                                                 |
| 11 | ABILITY TO MAKE INDEPENDENT CLINICAL DECISIONS (e.g., ability to make an urgent decision in an emergency, dealing with uncertain outcomes, evaluating risks to patients and self)                                           | COMB | I am confident in my ability to make appropriate independent clinical decisions |
| 12 |                                                                                                                                                                                                                             |      |                                                                                 |
| 13 | UNDERSTANDING OWN POTENTIAL TO EMPOWER PEOPLE                                                                                                                                                                               | INC  |                                                                                 |
| 14 |                                                                                                                                                                                                                             |      |                                                                                 |
| 15 | ABILITY TO WORK AS PART OF A TEAM WORK (e.g., understanding TEAM WORK group norms, perception of roles within the group, managing personal objectives within a group)                                                       | INC  |                                                                                 |
| 16 |                                                                                                                                                                                                                             |      |                                                                                 |
| 17 | ABILITY TO BUILD A GLOBAL NETWORK                                                                                                                                                                                           | INC  |                                                                                 |
| 18 |                                                                                                                                                                                                                             |      |                                                                                 |
| 19 | ABILITY TO DISSEMINATION BEST PRACTICE GLOBALLY                                                                                                                                                                             | INC  |                                                                                 |
| 20 |                                                                                                                                                                                                                             |      |                                                                                 |
| 21 | APPRECIATION OF FREE UNIVERSAL HEALTH (e.g., the NHS system of free healthcare for all, privilege and opportunity, the expectations that are placed on NHS by service users)                                                | INC  |                                                                                 |
| 22 |                                                                                                                                                                                                                             |      |                                                                                 |
| 23 | IMPROVED SITUATIONAL AWARENESS (i.e., understanding your environment so you can understand what to do)                                                                                                                      | REM  | Research suggests self-report does not measure this effectively                 |
| 24 |                                                                                                                                                                                                                             |      |                                                                                 |
| 25 | INCREASED JOB SATISFACTION (e.g., increased motivation and morale within profession, renewed passion for work, sense of reward)                                                                                             | INC  |                                                                                 |
| 26 |                                                                                                                                                                                                                             |      |                                                                                 |
| 27 | PERSONAL SATISFACTION (e.g., personal achievements and challenges, new experiences, experiencing a different lifestyle, a holiday, appreciation of own life, personal fulfilment)                                           | INC  |                                                                                 |
| 28 |                                                                                                                                                                                                                             |      |                                                                                 |
| 29 | CAN-DO ATTITUDE                                                                                                                                                                                                             | INC  |                                                                                 |
| 30 |                                                                                                                                                                                                                             |      |                                                                                 |
| 31 | ABILITY TO PROVIDE BETTER CARE (e.g., ability to integrate primary and secondary care, to provide multicultural care, to develop most effective approaches to care and taking responsibility for providing quality of care) | INC  |                                                                                 |
| 32 |                                                                                                                                                                                                                             |      |                                                                                 |
| 33 | ABILITY TO CO-OPERATE (e.g., willingness to see another point of view)                                                                                                                                                      | INC  |                                                                                 |
| 34 |                                                                                                                                                                                                                             |      |                                                                                 |
| 35 | APPRECIATION OF CLINICAL GOVERNANCE PROCEDURES WITHIN NHS (e.g., waste disposal, audit, TEAM WORKwork, education system, tests and investigations)                                                                          | COMB | I have thought about and appreciated clinical governance                        |
| 36 |                                                                                                                                                                                                                             |      |                                                                                 |
| 37 | APPRECIATION OF THE IMPORTANCE OF CARE AND COMPASSION (e.g., ability to compare compassion in both systems, empathy and fairness)                                                                                           | INC  |                                                                                 |
| 38 |                                                                                                                                                                                                                             |      |                                                                                 |
| 39 | INCREASED AWARENESS OF/KNOWLEDGE ABOUT THE POSITIVE IMPACT OF CLINICAL POLICIES AND GOVERNANCE (e.g., understanding the benefits of a comprehensive checklist)                                                              | COMB | I have thought about and appreciated clinical governance                        |
| 40 |                                                                                                                                                                                                                             |      |                                                                                 |
| 41 | INCREASED AWARENESS OF/KNOWLEDGE ABOUT ETHICS (i.e., experiencing ethical dilemmas, understanding the importance of ethics)                                                                                                 | COMB | I have frequently experienced ethical dilemmas                                  |
| 42 |                                                                                                                                                                                                                             |      |                                                                                 |
| 43 |                                                                                                                                                                                                                             |      |                                                                                 |
| 44 |                                                                                                                                                                                                                             |      |                                                                                 |
| 45 |                                                                                                                                                                                                                             |      |                                                                                 |
| 46 |                                                                                                                                                                                                                             |      |                                                                                 |
| 47 |                                                                                                                                                                                                                             |      |                                                                                 |
| 48 |                                                                                                                                                                                                                             |      |                                                                                 |
| 49 |                                                                                                                                                                                                                             |      |                                                                                 |
| 50 |                                                                                                                                                                                                                             |      |                                                                                 |
| 51 |                                                                                                                                                                                                                             |      |                                                                                 |
| 52 |                                                                                                                                                                                                                             |      |                                                                                 |
| 53 |                                                                                                                                                                                                                             |      |                                                                                 |
| 54 |                                                                                                                                                                                                                             |      |                                                                                 |
| 55 |                                                                                                                                                                                                                             |      |                                                                                 |
| 56 |                                                                                                                                                                                                                             |      |                                                                                 |
| 57 |                                                                                                                                                                                                                             |      |                                                                                 |
| 58 |                                                                                                                                                                                                                             |      |                                                                                 |
| 59 |                                                                                                                                                                                                                             |      |                                                                                 |
| 60 |                                                                                                                                                                                                                             |      |                                                                                 |

|    |                                                                                                                                                                                                                                                                                                          |      |                                                                                        |
|----|----------------------------------------------------------------------------------------------------------------------------------------------------------------------------------------------------------------------------------------------------------------------------------------------------------|------|----------------------------------------------------------------------------------------|
| 1  | CHANGED PERCEPTION OF OTHERNESS (e.g., understanding importance of being a friendly stranger in UK, feeling like a foreigner)                                                                                                                                                                            | INC  |                                                                                        |
| 2  |                                                                                                                                                                                                                                                                                                          |      |                                                                                        |
| 3  | INTEGRITY                                                                                                                                                                                                                                                                                                | REM  | Too vague                                                                              |
| 4  |                                                                                                                                                                                                                                                                                                          |      |                                                                                        |
| 5  | INDEPENDENCE (e.g., lone working)                                                                                                                                                                                                                                                                        | INC  |                                                                                        |
| 6  |                                                                                                                                                                                                                                                                                                          |      |                                                                                        |
| 7  | ABILITY TO PLAN AND ORGANISE (e.g., ability to set direction, improved audit skills)                                                                                                                                                                                                                     | INC  |                                                                                        |
| 8  |                                                                                                                                                                                                                                                                                                          |      |                                                                                        |
| 9  | ABILITY TO MAKE DECISIONS (e.g., understanding who the decision is for, taking action on decision, making judgements)                                                                                                                                                                                    | COMB | I am confident in my ability to make appropriate independent clinical decisions        |
| 10 |                                                                                                                                                                                                                                                                                                          |      |                                                                                        |
| 11 | ABILITY TO MANAGE RISK (e.g., manage risk in advance, evaluation of environment, understanding the clinical importance of risk management and the wider implication of poorly managed risk)                                                                                                              | INC  |                                                                                        |
| 12 |                                                                                                                                                                                                                                                                                                          |      |                                                                                        |
| 13 | INCREASED PATIENT SATISFACTION (e.g., staff better able to respond to UK multicultural populations, staff able to compare how systems affect patient satisfaction, have greater relationships with multicultural population, more in tune with patients and more aware of individual needs of patients). | REM  | Cannot be measured in professional self-reports alone                                  |
| 14 |                                                                                                                                                                                                                                                                                                          |      |                                                                                        |
| 15 | ABILITY TO COMMUNICATE NON-VERBALLY                                                                                                                                                                                                                                                                      | INC  |                                                                                        |
| 16 |                                                                                                                                                                                                                                                                                                          |      |                                                                                        |
| 17 | ABILITY TO ESTABLISH COMMUNICATION SYSTEMS (e.g., formal and informal)                                                                                                                                                                                                                                   | INC  |                                                                                        |
| 18 |                                                                                                                                                                                                                                                                                                          |      |                                                                                        |
| 19 | INCREASED CLINICAL KNOWLEDGE IN RELATION TO OTHER PROFESSIONS (e.g., doctors understanding nurses and vice versa, multi-disciplinary awareness)                                                                                                                                                          | INC  |                                                                                        |
| 20 |                                                                                                                                                                                                                                                                                                          |      |                                                                                        |
| 21 | ABILITY TO GET THE MOST OUT OF PEOPLE (e.g., encouraging people to work together, recognise their own strengths and to take possession of their own work/projects, ability to assess the capability of others)                                                                                           | INC  |                                                                                        |
| 22 |                                                                                                                                                                                                                                                                                                          |      |                                                                                        |
| 23 | ABILITY TO MANAGE PEOPLE (e.g., able to allocate tasks and co-ordinate people, to deal with people with differing objectives, to negotiate with multiple stakeholders, to manage difficult people)                                                                                                       | COMB | Colleagues have noticed my abilities to manage difficult people                        |
| 24 |                                                                                                                                                                                                                                                                                                          |      |                                                                                        |
| 25 | ABILITY TO DEVELOP FRIENDSHIPS (e.g., relationship formation skills, developing new friendships)                                                                                                                                                                                                         | INC  |                                                                                        |
| 26 |                                                                                                                                                                                                                                                                                                          |      |                                                                                        |
| 27 | ABILITY TO MANAGE SELF (e.g., own expectations, self-reliance, self-management, self-assurance, reflexivity)                                                                                                                                                                                             | INC  |                                                                                        |
| 28 |                                                                                                                                                                                                                                                                                                          |      |                                                                                        |
| 29 | CHANGED JUDGEMENT (e.g., non-judgemental attitude, changed self-judgement)                                                                                                                                                                                                                               | INC  |                                                                                        |
| 30 |                                                                                                                                                                                                                                                                                                          |      |                                                                                        |
| 31 | DIPLOMACY                                                                                                                                                                                                                                                                                                | REM  | Too vague                                                                              |
| 32 |                                                                                                                                                                                                                                                                                                          |      |                                                                                        |
| 33 | ABILITY TO FIND FACTS TO SOLVE PROBLEMS                                                                                                                                                                                                                                                                  | INC  |                                                                                        |
| 34 |                                                                                                                                                                                                                                                                                                          |      |                                                                                        |
| 35 | DEVELOPING REDUNDANT OR BAD SKILLS/ATTITUDES (e.g., developing non-transferable skills, bad habits, deskilling, returning with overconfidence in own ability, poorer communication skills, loss of confidence)                                                                                           | INC  |                                                                                        |
| 36 |                                                                                                                                                                                                                                                                                                          |      |                                                                                        |
| 37 | FINANCIAL LOSS (e.g., costs of getting involved, loss of earnings, pension or employment entitlement)                                                                                                                                                                                                    | REM  | Too contextual- add to variables                                                       |
| 38 |                                                                                                                                                                                                                                                                                                          |      |                                                                                        |
| 39 | REDUCTION IN NHS DROP OUTS (e.g., increased staff retention, when they volunteer and come back to NHS)                                                                                                                                                                                                   | REM  | Cannot be measured in professional self-reports alone                                  |
| 40 |                                                                                                                                                                                                                                                                                                          |      |                                                                                        |
| 41 | ABILITY TO OBSERVE AND EXAMINE PATIENTS (e.g., increased intuitive knowledge of clinical signs and clinical judgement ability to make diagnosis without investigations)                                                                                                                                  | COMB | I have relied heavily on the basic skills of my profession (e.g. physical examination) |
| 42 |                                                                                                                                                                                                                                                                                                          |      |                                                                                        |
| 43 | ABILITY TO WORK IN A PROFESSIONALLY COMPETENT WAY (e.g., having wider view of profession, intellectual development, reminder of professional responsibilities, stronger work ethic)                                                                                                                      | REM  | Too vague                                                                              |
| 44 |                                                                                                                                                                                                                                                                                                          |      |                                                                                        |
| 45 | INCREASED UNDERSTANDING OF HOW TO BE A GOOD TEACHER (e.g., allowing students to learn from mistakes, ability to suggest and acknowledge improvements in teaching,                                                                                                                                        | COMB | In the last month I have demonstrated that I'm a good teacher                          |
| 46 |                                                                                                                                                                                                                                                                                                          |      |                                                                                        |
| 47 |                                                                                                                                                                                                                                                                                                          |      |                                                                                        |
| 48 |                                                                                                                                                                                                                                                                                                          |      |                                                                                        |
| 49 |                                                                                                                                                                                                                                                                                                          |      |                                                                                        |
| 50 |                                                                                                                                                                                                                                                                                                          |      |                                                                                        |
| 51 |                                                                                                                                                                                                                                                                                                          |      |                                                                                        |
| 52 |                                                                                                                                                                                                                                                                                                          |      |                                                                                        |
| 53 |                                                                                                                                                                                                                                                                                                          |      |                                                                                        |
| 54 |                                                                                                                                                                                                                                                                                                          |      |                                                                                        |
| 55 |                                                                                                                                                                                                                                                                                                          |      |                                                                                        |
| 56 |                                                                                                                                                                                                                                                                                                          |      |                                                                                        |
| 57 |                                                                                                                                                                                                                                                                                                          |      |                                                                                        |
| 58 |                                                                                                                                                                                                                                                                                                          |      |                                                                                        |
| 59 |                                                                                                                                                                                                                                                                                                          |      |                                                                                        |
| 60 |                                                                                                                                                                                                                                                                                                          |      |                                                                                        |



|    |                                                                                                                                        |      |                                                                                                                                         |
|----|----------------------------------------------------------------------------------------------------------------------------------------|------|-----------------------------------------------------------------------------------------------------------------------------------------|
| 1  | understanding how communication affects learning, how to target training most effectively and the importance of experiential learning) |      | I am confident in my ability to teach others                                                                                            |
| 2  | 3                                                                                                                                      |      |                                                                                                                                         |
| 4  | 4                                                                                                                                      |      |                                                                                                                                         |
| 5  | 5                                                                                                                                      |      |                                                                                                                                         |
| 6  | 6                                                                                                                                      | INC  |                                                                                                                                         |
| 7  | 7                                                                                                                                      |      |                                                                                                                                         |
| 8  | 8                                                                                                                                      | REM  | Went into variables                                                                                                                     |
| 9  | 9                                                                                                                                      |      |                                                                                                                                         |
| 10 | 10                                                                                                                                     |      |                                                                                                                                         |
| 11 | 11                                                                                                                                     | CHAN | In my ability to manage myself and prioritise (e.g. time management, managing emotions, responding an emergency, prioritising workload) |
| 12 | 12                                                                                                                                     | G    |                                                                                                                                         |
| 13 | 13                                                                                                                                     |      |                                                                                                                                         |
| 14 | 14                                                                                                                                     |      |                                                                                                                                         |
| 15 | 15                                                                                                                                     |      |                                                                                                                                         |
| 16 | 16                                                                                                                                     | COMB | In my work I have demonstrated skills in changing patients' or colleagues' behaviours                                                   |
| 17 | 17                                                                                                                                     |      |                                                                                                                                         |
| 18 | 18                                                                                                                                     |      |                                                                                                                                         |
| 19 | 19                                                                                                                                     |      |                                                                                                                                         |
| 20 | 20                                                                                                                                     | INC  |                                                                                                                                         |
| 21 | 21                                                                                                                                     |      |                                                                                                                                         |
| 22 | 22                                                                                                                                     | COMB | I have frequently experienced ethical dilemmas                                                                                          |
| 23 | 23                                                                                                                                     |      |                                                                                                                                         |
| 24 | 24                                                                                                                                     | REM  | Cannot be measured in professional self-reports alone                                                                                   |
| 25 | 25                                                                                                                                     |      |                                                                                                                                         |
| 26 | 26                                                                                                                                     | REM  | Put into variables                                                                                                                      |
| 27 | 27                                                                                                                                     |      |                                                                                                                                         |
| 28 | 28                                                                                                                                     | REM  | Cannot be measured in professional self-reports alone                                                                                   |
| 29 | 29                                                                                                                                     |      |                                                                                                                                         |
| 30 | 30                                                                                                                                     | REM  | Cannot be measured in professional self-reports alone                                                                                   |
| 31 | 31                                                                                                                                     |      |                                                                                                                                         |
| 32 | 32                                                                                                                                     | INC  |                                                                                                                                         |
| 33 | 33                                                                                                                                     |      |                                                                                                                                         |
| 34 | 34                                                                                                                                     | INC  |                                                                                                                                         |
| 35 | 35                                                                                                                                     |      |                                                                                                                                         |
| 36 | 36                                                                                                                                     | INC  |                                                                                                                                         |
| 37 | 37                                                                                                                                     |      |                                                                                                                                         |
| 38 | 38                                                                                                                                     | INC  |                                                                                                                                         |
| 39 | 39                                                                                                                                     |      |                                                                                                                                         |
| 40 | 40                                                                                                                                     | INC  |                                                                                                                                         |
| 41 | 41                                                                                                                                     |      |                                                                                                                                         |
| 42 | 42                                                                                                                                     | INC  |                                                                                                                                         |
| 43 | 43                                                                                                                                     |      |                                                                                                                                         |
| 44 | 44                                                                                                                                     | COMB | Colleagues have noticed my abilities to manage difficult people                                                                         |
| 45 | 45                                                                                                                                     |      |                                                                                                                                         |
| 46 | 46                                                                                                                                     | INC  |                                                                                                                                         |
| 47 | 47                                                                                                                                     |      |                                                                                                                                         |
| 48 | 48                                                                                                                                     | INC  |                                                                                                                                         |
| 49 | 49                                                                                                                                     |      |                                                                                                                                         |
| 50 | 50                                                                                                                                     | INC  |                                                                                                                                         |
| 51 | 51                                                                                                                                     |      |                                                                                                                                         |
| 52 | 52                                                                                                                                     | INC  |                                                                                                                                         |
| 53 | 53                                                                                                                                     |      |                                                                                                                                         |
| 54 | 54                                                                                                                                     | INC  |                                                                                                                                         |
| 55 | 55                                                                                                                                     |      |                                                                                                                                         |
| 56 | 56                                                                                                                                     | INC  |                                                                                                                                         |
| 57 | 57                                                                                                                                     |      |                                                                                                                                         |
| 58 | 58                                                                                                                                     | INC  |                                                                                                                                         |
| 59 | 59                                                                                                                                     | INC  |                                                                                                                                         |
| 60 | 60                                                                                                                                     |      |                                                                                                                                         |

|                                                                                                                                       |     |                                                       |
|---------------------------------------------------------------------------------------------------------------------------------------|-----|-------------------------------------------------------|
| ABILITY TO ENGAGE SENIOR PEOPLE                                                                                                       | INC |                                                       |
| HEALTH CONSEQUENCES (e.g., animal bites, tropical diseases, STDs, injuries and transport accidents, infection, jet lag, skin disease) | REM | Went into variables                                   |
| EXTREME NATIONALISM TOWARDS UK                                                                                                        | INC |                                                       |
| LOSS OF INTEREST IN PROFESSION (e.g., not wanting to work in your profession when home)                                               | INC |                                                       |
| NHS BECOMES A MORE ATTRACTIVE EMPLOYER (e.g., an employer that offers staff the opportunity to volunteer)                             | REM | Cannot be measured in professional self-reports alone |
| INCREASED WORKFORCE PRODUCTIVITY                                                                                                      | REM | Cannot be measured in professional self-reports alone |

**Table 2: Construct used to frame statement**

| Statement                                                                                                | Area of Interest         |
|----------------------------------------------------------------------------------------------------------|--------------------------|
| awareness about how cultural differences influence health                                                | Experience               |
| ability to find solutions despite limited resources                                                      | Confidence               |
| find solutions despite limited resources                                                                 | Experience<br>Confidence |
| conscious of culture when working with patients (e.g. the importance of collecting cultural information) | Attitudes                |
| ability to apply clinical skills to another context                                                      | Confidence               |
| teach clinical colleagues                                                                                | Experience               |
| adapt the way I teach to make it more valuable                                                           | Experience               |
| knowledge about how healthcare systems outside of the UK function                                        | Attitudes                |
| ability to cope in work (e.g. ability to deal with stress)                                               | Experience               |
| cultural sensitivity (e.g. understanding that words and behaviours can have different meanings)          | Experience               |
| apply my clinical knowledge in any health system                                                         | Confidence               |
| developed a new perspective (e.g. changed my outlook)                                                    | Experience               |
| ability to adapt and be flexible in work                                                                 | Confidence<br>Experience |
| thinking about basic sciences (e.g. physiology, cell biological, biochemistry)                           | Experience               |
| relied basic skills profession (e.g. physical examination)                                               | Experience               |
| rely more on laboratory tests than physical examination                                                  | Attitudes                |
| confident in workplace                                                                                   | Confidence               |
| confident to work in another country                                                                     | Confidence               |
| knowledge about global issues                                                                            | Attitudes                |

|                                                                                                                                    |                          |
|------------------------------------------------------------------------------------------------------------------------------------|--------------------------|
| knowledge of conditions and procedures rarely encountered in the UK (e.g. tropical diseases, delayed presentations, old equipment) | Attitudes                |
| ability to work within an unfamiliar power dynamic                                                                                 | Confidence               |
| adapting my social norms to meet the needs of another culture                                                                      | Experience               |
| leader in work                                                                                                                     | Experience               |
| my abilities to be adaptable and innovative as a leader                                                                            | Confidence               |
| thought about my own skills, limitations and beliefs                                                                               | Experience               |
| patient and tolerant                                                                                                               | Experience               |
| proactive at work (e.g. used my initiative, got on with things, thought on feet)                                                   | Experience               |
| someone who focuses on solutions not problems                                                                                      | Attitudes                |
| changed the way I speak so that somebody can understand me                                                                         | Experience               |
| community participation is crucial for the health of the individual                                                                | Attitudes                |
| clinical skills that I have hardly ever used before                                                                                | Experience               |
| difficult to change someone else's behaviour                                                                                       | Attitudes                |
| skills in changing patients' or colleagues' behaviours                                                                             | Experience               |
| improved the healthcare service I work in                                                                                          | Experience               |
| changed the way I communicate to make it more contextually appropriate                                                             | Experience               |
| good teacher                                                                                                                       | Experience               |
| ability to deal with the unexpected                                                                                                | ConfidenceExperience     |
| ability to manage projects                                                                                                         | Confidence<br>Experience |
| deeply engaged with issues and equality and diversity                                                                              | Attitudes                |
| highly skilled in challenging conversations and effective communication, even in high pressure situations                          | Experience               |
| glad that I have access to the right tools and equipment to do my job                                                              | Experience               |
| thought about and appreciated the excellent TEAM WORKs, structures and individuals I work with in the NHS                          | Experience               |
| good understanding of my own thoughts, feelings and behaviours                                                                     | Attitudes                |
| I am good at anticipating future problems                                                                                          | Experience               |
| ability to make appropriate independent clinical decisions                                                                         | Confidence               |
| ability to empower others to help themselves                                                                                       | Attitudes                |
| good at working as part of TEAM WORK                                                                                               | Experience               |



|    |                                                            |            |
|----|------------------------------------------------------------|------------|
| 1  |                                                            |            |
| 2  |                                                            |            |
| 3  | professional network that includes people from all over    | Attitudes  |
| 4  | the world                                                  |            |
| 5  | confident in my ability to disseminate UK best clinical    | Confidence |
| 6  | practice globally                                          |            |
| 7  | thought about and appreciated free universal health        | Experience |
| 8  |                                                            |            |
| 9  | gone about my daily work in a fairly automatic way         | Experience |
| 10 |                                                            |            |
| 11 | satisfied in job                                           | Attitudes  |
| 12 |                                                            |            |
| 13 | satisfied in personal life                                 | Attitudes  |
| 14 | 'can-do' attitude                                          | Experience |
| 15 |                                                            |            |
| 16 | provide excellent, high quality care                       | Experience |
| 17 |                                                            |            |
| 18 | willingness to see someone else's point of view            | Experience |
| 19 | thought about and appreciated clinical governance          | Experience |
| 20 | thought about and appreciated the importance of care       | Experience |
| 21 | and compassion                                             |            |
| 22 | experienced ethical dilemmas                               | Experience |
| 23 |                                                            |            |
| 24 | appropriately manage ethical dilemmas                      | Confidence |
| 25 | experiences of feeling like an outsider                    | Attitudes  |
| 26 |                                                            |            |
| 27 | abilities to work independently when necessary             | Confident  |
| 28 |                                                            |            |
| 29 | abilities in planning and organisation                     | Experience |
| 30 | actively manage risk, including anticipating risk and      | Experience |
| 31 | evaluating my environment                                  |            |
| 32 | to rely on my non-verbal communication                     | Experience |
| 33 | establish communication systems (formal or informal)       | Experience |
| 34 |                                                            |            |
| 35 | understanding of the roles and responsibilities of all the | Attitudes  |
| 36 | professional staff I work with                             |            |
| 37 | capable of 'getting the most out of people' e.g.,          | Attitudes  |
| 38 | encouraging them and empowering them                       |            |
| 39 | managed difficult people                                   | Experience |
| 40 |                                                            | Confidence |
| 41 |                                                            |            |
| 42 | allocated tasks and co-ordinated colleagues                | Experience |
| 43 |                                                            | Confidence |
| 44 |                                                            |            |
| 45 | developing friendships and social relationships            | Attitudes  |
| 46 |                                                            |            |
| 47 | ability to manage myself, including self-reliance and      | Confidence |
| 48 | reflexivity                                                |            |
| 49 | quick to judge other people                                | Attitudes  |
| 50 |                                                            |            |
| 51 | developed bad habits in work                               | Experience |
| 52 |                                                            |            |
| 53 | lost some confidence in my clinical practice               | Experience |
| 54 | work ethic                                                 | Attitudes  |
| 55 |                                                            |            |
| 56 | act as a good role model at work                           | Attitudes  |
| 57 |                                                            |            |
| 58 |                                                            |            |
| 59 |                                                            |            |
| 60 |                                                            |            |

|                                                                                                     |                          |
|-----------------------------------------------------------------------------------------------------|--------------------------|
| manage situations that I consider to be a tragedy                                                   | Experience<br>Confidence |
| ability to explain complex ideas to others                                                          | Experience               |
| trust between colleagues is crucial in healthcare systems                                           | Attitudes                |
| good understanding of organisations e.g., identifying change agents and understanding who has power | Attitudes                |
| work has made me feel refreshed and reinvigorated                                                   | Experience               |
| consciously make an effort to get on with colleagues e.g. learning everybody's name                 | Attitudes                |
| aware of the financial costs of healthcare                                                          | Experience               |
| persistent in the face of failure                                                                   | Attitudes                |
| accept failure as a part of learning                                                                | Attitudes                |
| direct and positive communication with senior people in the organisation I have been working in     | Experience               |
| the UK is the best country in the world                                                             | Attitudes                |

**Table 3: Variables from systematic review and when they were presented t**

| <b><u>Variable</u></b>                                   | <b><u>Presented</u></b> |
|----------------------------------------------------------|-------------------------|
| Type of project (Charity, profit making, non-for-profit) | To project manager      |
| Professionals involved in project                        | To project manager      |
| Volunteer recruitment                                    | To project manager      |
| Continuity of visits                                     | To project manager      |
| Number of British professionals in country at each time  | To project manager      |
| Logistical organisation                                  | To project manager      |
| Project funding                                          | To project manager      |
| Volunteer/British Professional funding                   | To project manager      |
| Local funding                                            | To project manager      |
| Volunteer activities                                     | To project manager      |
| Organisational support                                   | To project manager      |
| Preparation                                              | To project manager      |
| Learning objectives                                      | To project manager      |
| Evaluation and reflection                                | To project manager      |
| Risk Assessments                                         | To project manager      |

|                                                                      |                              |
|----------------------------------------------------------------------|------------------------------|
| Local needs assessment                                               | To project manager           |
| Who is involved in development of aims, focus, structure of project  | To project manager           |
| Relationships with receiving organisation                            | To project manager           |
| Importance of sustainability, capacity building and service delivery | To project manager           |
| Project name, company and location                                   | Pre-placement questionnaire  |
| Employment immediately before trip                                   | Pre-placement questionnaire  |
| Use of annual leave                                                  | Pre-placement questionnaire  |
| Motivation                                                           | Pre-placement questionnaire  |
| Support                                                              | Pre-placement questionnaire  |
| Comfort working outside of competence or in a high situation         | Pre-placement questionnaire  |
| Expectations of impact                                               | Pre-placement questionnaire  |
| Professional knowledge                                               | Pre-placement questionnaire  |
| Length of stay                                                       | Post-placement questionnaire |
| Project engagement                                                   | Post-placement questionnaire |
| Learning host language                                               | Post-placement questionnaire |
| Utilisation of skills                                                | Post-placement questionnaire |
| Number of Interactions with patients                                 | Post-placement questionnaire |
| Conditions experienced                                               | Post-placement questionnaire |
| Understanding of local context                                       | Post-placement questionnaire |
| Similarities to UK                                                   | Post-placement questionnaire |
| Transferability of skills to UK                                      | Post-placement questionnaire |
| Opportunities                                                        | Post-placement questionnaire |
| Local staff                                                          | Post-placement questionnaire |

|                                                |                              |
|------------------------------------------------|------------------------------|
| Negative consequences                          | Post-placement questionnaire |
| Cost of placement                              | Post-placement questionnaire |
| Reflection                                     | Post-placement questionnaire |
| Contact with loved ones                        | Post-placement questionnaire |
| Support                                        | Post-placement questionnaire |
| Number of projects in facility                 | Post-placement questionnaire |
| General experience                             | Post-placement questionnaire |
| Ability to cope with NHS paperwork upon return | Post-placement questionnaire |
| Less interest in profession upon return        | Post-placement questionnaire |
| Desire to leave NHS/UK upon return             | Post-placement questionnaire |
| Recognition/Accreditation upon return          | Post-placement questionnaire |
| Employment status upon return                  | Post-placement questionnaire |
| Returner schemes upon return                   | Post-placement questionnaire |
| Influence on career path upon return           | Post-placement questionnaire |

## **Table 4 : results of cognitive interviews**

| Statement                                                  | Comment                                                                             | Action taken (or reason not )                                                                                                 |
|------------------------------------------------------------|-------------------------------------------------------------------------------------|-------------------------------------------------------------------------------------------------------------------------------|
| Frequently/constantly                                      | interchangable                                                                      | Decision was made on purpose                                                                                                  |
| I exchanged ideas with colleagues from a different culture | Red herring- exchanged                                                              | Choose Exchanged, as communicated could mean asking what time the bus arrives, want this to represent meaningful conversation |
| I feel I've developed a new perspective                    | Doesn't really make sense pre-placement, need to use more examples to contextualise | Participant used, having some kind of revelation, include this as an example                                                  |
| I anticipated future problems                              | ... and took necessary action                                                       | Decided to take participants advice here, and add took necessary action as anticipating them alone is not enough              |
| Skills, limitations and beliefs                            | too much for one sentence                                                           | remove beliefs                                                                                                                |
| I provided excellent high quality care                     | Excellent and high quality are the same remove excellent                            | Remove excellent                                                                                                              |

|                                                                                                                                                                                                                                                                                                                                                             |                                                                                                                                                                                                                                                                                                                                                                                                                                                                                                                                                                                                                                                                                                                                                                                                                                                                                                                                                                                                                                                                                                                                                                                                                                                                                                                                     |                                                                                                                                                                                                                                                                                                                                                                                                                                                                                                                                                                                                                                                                                                                                                                                                                                                                                                                                                                                                                                                  |                                                                                                                                                                                                                                                                                                                                                                                                                                                                                                                                                                                                                                                                                                                                                                                                                                                                                                         |
|-------------------------------------------------------------------------------------------------------------------------------------------------------------------------------------------------------------------------------------------------------------------------------------------------------------------------------------------------------------|-------------------------------------------------------------------------------------------------------------------------------------------------------------------------------------------------------------------------------------------------------------------------------------------------------------------------------------------------------------------------------------------------------------------------------------------------------------------------------------------------------------------------------------------------------------------------------------------------------------------------------------------------------------------------------------------------------------------------------------------------------------------------------------------------------------------------------------------------------------------------------------------------------------------------------------------------------------------------------------------------------------------------------------------------------------------------------------------------------------------------------------------------------------------------------------------------------------------------------------------------------------------------------------------------------------------------------------|--------------------------------------------------------------------------------------------------------------------------------------------------------------------------------------------------------------------------------------------------------------------------------------------------------------------------------------------------------------------------------------------------------------------------------------------------------------------------------------------------------------------------------------------------------------------------------------------------------------------------------------------------------------------------------------------------------------------------------------------------------------------------------------------------------------------------------------------------------------------------------------------------------------------------------------------------------------------------------------------------------------------------------------------------|---------------------------------------------------------------------------------------------------------------------------------------------------------------------------------------------------------------------------------------------------------------------------------------------------------------------------------------------------------------------------------------------------------------------------------------------------------------------------------------------------------------------------------------------------------------------------------------------------------------------------------------------------------------------------------------------------------------------------------------------------------------------------------------------------------------------------------------------------------------------------------------------------------|
| 1<br>2<br>3<br>4<br>5<br>6<br>7<br>8<br>9<br>10<br>11<br>12<br>13<br>14<br>15<br>16<br>17<br>18<br>19<br>20<br>21<br>22<br>23<br>24<br>25<br>26<br>27<br>28<br>29<br>30<br>31<br>32<br>33<br>34<br>35<br>36<br>37<br>38<br>39<br>40<br>41<br>42<br>43<br>44<br>45<br>46<br>47<br>48<br>49<br>50<br>51<br>52<br>53<br>54<br>55<br>56<br>57<br>58<br>59<br>60 | <p>I am able to find solutions despite limited resources</p> <p>I have tried to understand somebody else's POV</p> <p>I have demonstrated patience and tolerance</p> <p>I relied heavily on the basic skills of my profession</p> <p>I lost some confidence in my clinical practice</p> <p>I thought about and appreciated</p> <p>I think I have developed bad work habits</p> <p>I actively managed risk, including anticipating risk and evaluating environment</p> <p>I frequently managed projects</p> <p>I managed one or more situations that I consider to be a tragedy</p> <p>I established communication systems (formal and informal)</p> <p>I changed the way I speak so that somebody can understand me</p> <p>I frequently had to rely on my non-verbal communication</p> <p>I demonstrated that I am highly skilled in challenging conversations and effective communication, even in high pressure situations</p> <p>I dealt with difficult people</p> <p>I demonstrated that I am able to manage difficult people</p> <p>I taught clinical colleagues</p> <p>Perceptions of yourself</p> <p>When I work clinically I am frequently thinking about basic scientific principles (e.g. physiology, cell biology, biochemistry)</p> <p>I have a good knowledge of how healthcare systems outside of the UK function</p> | <p>What if don't have limited resources i.e. in UK</p> <p>I have understood somebody else's POV</p> <p>Need time marker</p> <p>Need more examples</p> <p>Change to: Sometimes I feel I have forgotten the things I have learnt</p> <p>Maybe use just appreciated</p> <p>Remove 'I think' and include some</p> <p>Too much- change to I anticipated risk and actively managed it</p> <p>Chance to tragic situations</p> <p>What about if they are already established</p> <p>Change to I have adapted my communication to suit to context</p> <p>I frequently relied on my non-verbal communication</p> <p>I demonstrated that I am skilled in challenging conversations, even in high pressure situations</p> <p>Include frequently</p> <p>I demonstrated that I am able to manage difficult people effectively</p> <p>(of any profession at any career stage)</p> <p>Change to About you – and change the other to demographics</p> <p>Change e.g's</p> <p>I have an awareness of how other healthcare systems (outside of the UK) function</p> | <p>Leave as is, participants won't agree if have adequate resources</p> <p>Remove tried</p> <p>Change to -I have frequently demonstrated patience and tolerance</p> <p>Include low tech and intuitive</p> <p>Leave as is, participants will know what clinical practice is</p> <p>change</p> <p>I have developed some bad work habits</p> <p>I anticipated risk and actively managed it (e.g. evaluating environment)</p> <p>Include e.g. (including one continuous project, or components of a project)</p> <p>Leave as is</p> <p>Changed to established/used</p> <p>Leave as is, too much jargon in suggestion</p> <p>Change</p> <p>Removed some to make it more understandable</p> <p>I frequently dealt with difficult people</p> <p>Add in effectively</p> <p>Add in brackets</p> <p>Change</p> <p>Physiology, chemistry</p> <p>Change- as most people will only know 1 or 2 countries not all</p> |
|-------------------------------------------------------------------------------------------------------------------------------------------------------------------------------------------------------------------------------------------------------------------------------------------------------------------------------------------------------------|-------------------------------------------------------------------------------------------------------------------------------------------------------------------------------------------------------------------------------------------------------------------------------------------------------------------------------------------------------------------------------------------------------------------------------------------------------------------------------------------------------------------------------------------------------------------------------------------------------------------------------------------------------------------------------------------------------------------------------------------------------------------------------------------------------------------------------------------------------------------------------------------------------------------------------------------------------------------------------------------------------------------------------------------------------------------------------------------------------------------------------------------------------------------------------------------------------------------------------------------------------------------------------------------------------------------------------------|--------------------------------------------------------------------------------------------------------------------------------------------------------------------------------------------------------------------------------------------------------------------------------------------------------------------------------------------------------------------------------------------------------------------------------------------------------------------------------------------------------------------------------------------------------------------------------------------------------------------------------------------------------------------------------------------------------------------------------------------------------------------------------------------------------------------------------------------------------------------------------------------------------------------------------------------------------------------------------------------------------------------------------------------------|---------------------------------------------------------------------------------------------------------------------------------------------------------------------------------------------------------------------------------------------------------------------------------------------------------------------------------------------------------------------------------------------------------------------------------------------------------------------------------------------------------------------------------------------------------------------------------------------------------------------------------------------------------------------------------------------------------------------------------------------------------------------------------------------------------------------------------------------------------------------------------------------------------|

|                                                                                                                                                                                                                                                                                                                                                             |                                                                                                                                                                                                                                                                                                                                                                                                                                                                                                                                                                                                                                                                                                                                                                                                                                                                                                                                                                |                                                                                                                                                                                                                                                                                                                                                                                                                                                                                                                                                                                                                                                                                                                              |                                                                                                                                                                                                                                                                                                                                                                                                                                                                                                                                                                                                                                                                                                                                                                                                                                                                                                                                                                                                                                                                                                                                                                                                                                                                                                                                                                                                                                                                                  |
|-------------------------------------------------------------------------------------------------------------------------------------------------------------------------------------------------------------------------------------------------------------------------------------------------------------------------------------------------------------|----------------------------------------------------------------------------------------------------------------------------------------------------------------------------------------------------------------------------------------------------------------------------------------------------------------------------------------------------------------------------------------------------------------------------------------------------------------------------------------------------------------------------------------------------------------------------------------------------------------------------------------------------------------------------------------------------------------------------------------------------------------------------------------------------------------------------------------------------------------------------------------------------------------------------------------------------------------|------------------------------------------------------------------------------------------------------------------------------------------------------------------------------------------------------------------------------------------------------------------------------------------------------------------------------------------------------------------------------------------------------------------------------------------------------------------------------------------------------------------------------------------------------------------------------------------------------------------------------------------------------------------------------------------------------------------------------|----------------------------------------------------------------------------------------------------------------------------------------------------------------------------------------------------------------------------------------------------------------------------------------------------------------------------------------------------------------------------------------------------------------------------------------------------------------------------------------------------------------------------------------------------------------------------------------------------------------------------------------------------------------------------------------------------------------------------------------------------------------------------------------------------------------------------------------------------------------------------------------------------------------------------------------------------------------------------------------------------------------------------------------------------------------------------------------------------------------------------------------------------------------------------------------------------------------------------------------------------------------------------------------------------------------------------------------------------------------------------------------------------------------------------------------------------------------------------------|
| 1<br>2<br>3<br>4<br>5<br>6<br>7<br>8<br>9<br>10<br>11<br>12<br>13<br>14<br>15<br>16<br>17<br>18<br>19<br>20<br>21<br>22<br>23<br>24<br>25<br>26<br>27<br>28<br>29<br>30<br>31<br>32<br>33<br>34<br>35<br>36<br>37<br>38<br>39<br>40<br>41<br>42<br>43<br>44<br>45<br>46<br>47<br>48<br>49<br>50<br>51<br>52<br>53<br>54<br>55<br>56<br>57<br>58<br>59<br>60 | <p>I have a professional network that includes people from around the world</p> <p>I tend to develop a good understanding of how organisations can work</p> <p>I am someone who focuses on solutions not problems</p> <p>I have an excellent work ethic</p> <p>I keep trying when things are difficult</p> <p>I have an excellent understanding of the roles and responsibilities of all the professional staff I work with</p> <p>I am quick to judge other people</p> <p>I believe I have the ability to empower patients to help themselves</p> <p>I believe I have the ability to empower colleagues to help themselves</p> <p>In my work I have demonstrated skills in changing patients behaviour</p> <p>Its crucial to consciously make an effort to get on with colleagues</p> <p>I demonstrated that I am capable of getting the most out of people</p> <p>Community participation is crucial...</p> <p>Job satisfaction</p> <p>Life satisfaction</p> | <p>Change to other countries</p> <p>Change to I have</p> <p>Comments that no-one would answer no to this</p> <p>Comments to change to conscientious</p> <p>Comments to change to persevere</p> <p>Change to clear</p> <p>Add admit and sometimes</p> <p>I am able to empower patients to help themselves, also patients isn't the word midwives use</p> <p>I am able empower colleagues to help themselves</p> <p>In encouraging and supporting patients to change behaviour</p> <p>Add 'I feel'</p> <p>Change to 'best' move to 'in the last month'</p> <p>Add I feel</p> <p>Use validated single item- Taking everything into consideration, I am satisfied with my job</p> <p>Instead use 5 item validated SWLS scale</p> | <p>May not be around the world, just in 1 or 2 countries</p> <p>Tend to confuses things</p> <p>Then it would disappear in the psychometrics and statistics so leave</p> <p>Will not change means something different</p> <p>Yes keep simple</p> <p>I have a clear understanding of the roles and responsibilities of all the professional staff I work with</p> <p>I admit I am sometimes quick to judge other people</p> <p>Remove believe as adds another dimension, keep patients as it is obvious who we mean to that 1 group</p> <p>Remove believe as adds another dimension</p> <p>Change to -In my work I have demonstrated skills in encouraging and supporting patients to change behaviour</p> <p>No need to add 'I feel' adds another dimension</p> <p>Change to - I demonstrated that I am capable of getting the best out of people- move to last month, add enabling into e.g's</p> <p>No need to add 'I feel' adds another dimension</p> <p>Reliability and Validity of a Single-Item Measure of Job Satisfaction Christyn L. Dolbier, PhD; Judith A. Webster, MSN; Katherine T. McCalister, EdD; Mark W. Mallon, MS; Mary A. Steinhardt, EdD, LPC</p> <p>an adaptation of the one in the literature that correlates with other larger measures, to suit the current format of an agreement likert scale?</p> <p>Ed Diener, Robert A. Emmons, Randy J. Larsen and Sharon Griffin as noted in the 1985 article in the <i>Journal of Personality Assessment</i></p> |
|-------------------------------------------------------------------------------------------------------------------------------------------------------------------------------------------------------------------------------------------------------------------------------------------------------------------------------------------------------------|----------------------------------------------------------------------------------------------------------------------------------------------------------------------------------------------------------------------------------------------------------------------------------------------------------------------------------------------------------------------------------------------------------------------------------------------------------------------------------------------------------------------------------------------------------------------------------------------------------------------------------------------------------------------------------------------------------------------------------------------------------------------------------------------------------------------------------------------------------------------------------------------------------------------------------------------------------------|------------------------------------------------------------------------------------------------------------------------------------------------------------------------------------------------------------------------------------------------------------------------------------------------------------------------------------------------------------------------------------------------------------------------------------------------------------------------------------------------------------------------------------------------------------------------------------------------------------------------------------------------------------------------------------------------------------------------------|----------------------------------------------------------------------------------------------------------------------------------------------------------------------------------------------------------------------------------------------------------------------------------------------------------------------------------------------------------------------------------------------------------------------------------------------------------------------------------------------------------------------------------------------------------------------------------------------------------------------------------------------------------------------------------------------------------------------------------------------------------------------------------------------------------------------------------------------------------------------------------------------------------------------------------------------------------------------------------------------------------------------------------------------------------------------------------------------------------------------------------------------------------------------------------------------------------------------------------------------------------------------------------------------------------------------------------------------------------------------------------------------------------------------------------------------------------------------------------|

|                                                                                                                                     |                                                                                                                                                                          |                                                                                                                                                                                                                                                                                                     |
|-------------------------------------------------------------------------------------------------------------------------------------|--------------------------------------------------------------------------------------------------------------------------------------------------------------------------|-----------------------------------------------------------------------------------------------------------------------------------------------------------------------------------------------------------------------------------------------------------------------------------------------------|
| I sometimes I felt like an outsider                                                                                                 | I sometimes felt like an outsider in my environment                                                                                                                      | Add in my environment to make it more contextualised, move to culture area rather than life satisfaction as it seems less intrusive                                                                                                                                                                 |
| In my ability to manage situations that I consider to be awful, tragic or difficult                                                 | Remove awful, too many words                                                                                                                                             | In my ability to manage situations that I consider to be tragic or difficult                                                                                                                                                                                                                        |
| In my ability to manage myself                                                                                                      | Expand into 2:<br>In my ability to manage myself in a clinical environment<br>In my ability to manage myself in life generally (e.g. time management, managing emotions) | Split into 2                                                                                                                                                                                                                                                                                        |
| In my ability to adapt and be flexible in work                                                                                      | Would be different for clinical and everything else – pp more confident<br>In ability to be flexible clinically                                                          | Separated                                                                                                                                                                                                                                                                                           |
| In my ability to find solutions despite limited resources                                                                           | See above comment about 'despite'                                                                                                                                        | Maybe as this is confidence have, ability to find solutions in an environment with limited resources, the above one could literally say, in the last month I have had to find solutions in an environment with limited resources, then we expect low scores pre, and high during and possibly post. |
| That I can apply my clinical knowledge in any health systems                                                                        | Change any to another                                                                                                                                                    | That I can apply my clinical knowledge in another health system                                                                                                                                                                                                                                     |
| In my ability to work within an unfamiliar power dynamic                                                                            | Don't quite understand the question, suggested are you affected by power dynamics                                                                                        | Are you affected would change the question. move to in the last month, have been affected by power dynamics and one about dealing with it appropriately                                                                                                                                             |
| In my workplace                                                                                                                     | Remove place                                                                                                                                                             | Change to in my work                                                                                                                                                                                                                                                                                |
| In my ability to disseminate best practice globally                                                                                 | Globally too big, maybe across a wider context (e.g. to other countries)                                                                                                 | Change to disseminate UK best practice to other countries                                                                                                                                                                                                                                           |
| Career Stage                                                                                                                        | Louise and John had- experienced, mid etc.                                                                                                                               | Change to year of registration free text                                                                                                                                                                                                                                                            |
| Nationality                                                                                                                         | British, European, non-eu (LMIC) non-EU (high income)                                                                                                                    | Change to free text                                                                                                                                                                                                                                                                                 |
| Project Name                                                                                                                        | Make non-mandatory and ask to describe in one sentence project- e.g. RCM project in Uganda based in Mulago Hospital                                                      | in a sentence describe the title of your project and where it takes place e.g., RCM mentoring project in Mulago Hospital, Uganda. Or Milton Keynes Hospital Trust training project in University of City, Country                                                                                   |
| I would feel comfortable working in a high risk situations                                                                          | Comment- Is the risk to the patient or the volunteer                                                                                                                     | High risk situation is well defined                                                                                                                                                                                                                                                                 |
| I agreed with and internationalised lots of the knowledge, skills, behaviours and attitudes of the other staff in the host facility | Too confusing                                                                                                                                                            | Simplify sentence                                                                                                                                                                                                                                                                                   |



|                                                                                           |                                                                                                                                                                                                     |                                                                                                                                                                                                                                                                                                                                              |                                                                                                                                                                                 |
|-------------------------------------------------------------------------------------------|-----------------------------------------------------------------------------------------------------------------------------------------------------------------------------------------------------|----------------------------------------------------------------------------------------------------------------------------------------------------------------------------------------------------------------------------------------------------------------------------------------------------------------------------------------------|---------------------------------------------------------------------------------------------------------------------------------------------------------------------------------|
| 1<br>2<br>3<br>4<br>5<br>6                                                                | Atleast once I questioned by view of reality                                                                                                                                                        | Confusing- changed answer after I explained                                                                                                                                                                                                                                                                                                  | Change to at least once I have been aware of my opinions or perspectives changing in a profound way'                                                                            |
| 7<br>8<br>9<br>10<br>11<br>12<br>13<br>14<br>15<br>16<br>17<br>18<br>19<br>20<br>21<br>22 | Which of the following were correct about local staff:<br><br>I engaged with them frequently<br><br>There was frequently a more knowledgeable person than me around<br><br>We had many share values | Reword- seems like everyone would agree<br><br>Too Context Specific<br><br>Said they did but didn't act on it                                                                                                                                                                                                                                | This is about Vygotskys MKO, could we separate into 2- more clinically knowledgeable, more culturally knowledgeable<br><br>change to, it was obvious we had many shared values? |
| 23<br>24<br>25                                                                            | Health consequences (animal bites, injuries, illness)                                                                                                                                               | Remove animal bites, gets confused with mosquito bites which most people would get                                                                                                                                                                                                                                                           | Remove animal bites                                                                                                                                                             |
| 26<br>27<br>28                                                                            | I feel unable to cope with NHS paperwork                                                                                                                                                            | Not to do with placement                                                                                                                                                                                                                                                                                                                     | Doesn't matter? If its not to do with placement, then we will see that it is the same before and after?                                                                         |
| 29<br>30<br>31                                                                            | I would like to leave the NHS to work overseas                                                                                                                                                      | Not all employed by NHS                                                                                                                                                                                                                                                                                                                      | Change to NHS/UK                                                                                                                                                                |
| 32                                                                                        | Project Managers:                                                                                                                                                                                   |                                                                                                                                                                                                                                                                                                                                              |                                                                                                                                                                                 |
| 33<br>34<br>35<br>36<br>37<br>38<br>39<br>40<br>41<br>42                                  | Which of the following describe the relationship between your organisation and the receiving organisation:<br>We depend on eachother                                                                | Weird statement<br><br>Add in well maintained relationships with local staff and leadership<br>Links with local experts                                                                                                                                                                                                                      | Remove                                                                                                                                                                          |
| 43<br>44<br>45<br>46<br>47                                                                | Does your project have links with local experts and well maintained relationships with local staff and leadership                                                                                   | Move to earlier Q                                                                                                                                                                                                                                                                                                                            | Move to earlier Q                                                                                                                                                               |
| 48<br>49<br>50<br>51<br>52<br>53<br>54<br>55<br>56<br>57<br>58<br>59<br>60                | What type of preparation do volunteers receive?                                                                                                                                                     | Add all<br><br>Change options to:<br>Contact with previous volunteers<br>Formal training and preparation events in the UK<br>Informal training and preparation events in the UK<br>Formal training and preparation events in host country<br>Informal training and preparation events in country<br>Handbook or written preparation<br>Other | What type of preparation do all volunteers receive? – otherwise one or two might get it<br><br>Change options                                                                   |



|                                                                 |                                                                                                                                                                                   |                                                                                                                                                                                                                                                                                                   |                                                                                                                                                                                                                                                                 |
|-----------------------------------------------------------------|-----------------------------------------------------------------------------------------------------------------------------------------------------------------------------------|---------------------------------------------------------------------------------------------------------------------------------------------------------------------------------------------------------------------------------------------------------------------------------------------------|-----------------------------------------------------------------------------------------------------------------------------------------------------------------------------------------------------------------------------------------------------------------|
| 1<br>2<br>3<br>4                                                |                                                                                                                                                                                   |                                                                                                                                                                                                                                                                                                   |                                                                                                                                                                                                                                                                 |
| 5<br>6<br>7<br>8<br>9<br>10<br>11<br>12<br>13<br>14<br>15<br>16 | What is the main focus of your project:<br>Service delivery<br>Capacity Building<br>Development<br>Sustainability<br>Training<br>Other                                            | Most would tick all                                                                                                                                                                                                                                                                               | Change to separate question:<br><br>How important is sustainability/service delivery/capacity building to your project<br>– Very Important • Important • Moderately Important • Slightly Important • Not Important<br><br>Remove training development and other |
| 17<br>18<br>19<br>20<br>21<br>22<br>23<br>24<br>25<br>26        | Who was involved/consulting during development of aims, focus, structure, project tasks within your project                                                                       | Remove 'within your project'<br><br>In example grey area (at some stage)<br><br>Change health policy makers and management in LMIC to Management in LMIC<br>Local government and policy makers                                                                                                    | Change                                                                                                                                                                                                                                                          |
| 27<br>28<br>29<br>30                                            | Do your volunteers take recurring trips?                                                                                                                                          | Change options                                                                                                                                                                                                                                                                                    | Always<br>Very Often<br>Sometimes<br>Rarely<br>Never                                                                                                                                                                                                            |
| 31<br>32<br>33                                                  | In the last year have any volunteers dropped out of your project?                                                                                                                 | Remove as too context specific could be illness etc                                                                                                                                                                                                                                               | Remove question                                                                                                                                                                                                                                                 |
| 34<br>35<br>36<br>37                                            | Is volunteer learning incorporated into project or assessed?                                                                                                                      | Comment- Add informal reporting and learning                                                                                                                                                                                                                                                      | Do you formally assess volunteer learning or professional or personal development? And then time points                                                                                                                                                         |
| 38<br>39<br>40                                                  | How many volunteers are placed at one time within this project                                                                                                                    | Add on average                                                                                                                                                                                                                                                                                    | Add on average                                                                                                                                                                                                                                                  |
| 41<br>42<br>43<br>44<br>45<br>46<br>47<br>48<br>49              | How would you describe your organisation?                                                                                                                                         | Change list- does not encompass all, make tick box:<br><ul style="list-style-type: none"> <li>• New organisation</li> <li>• Established organisation</li> <li>• Hospital or university link (health partnership)</li> <li>• Commercial/profit making</li> <li>• Not for profit/charity</li> </ul> |                                                                                                                                                                                                                                                                 |
| 50<br>51<br>52<br>53<br>54<br>55<br>56<br>57<br>58<br>59<br>60  | Which of the following describe the relationship between your organisation and the receiving organisation?<br>We depend on one another<br>We are especially good at collaboration | Remove depend statement, weird and out of context<br>Change collaboration one to we work well in collaboration                                                                                                                                                                                    | Change                                                                                                                                                                                                                                                          |

|                                                                                               |                                                                                                                                                      |                                                                                                         |
|-----------------------------------------------------------------------------------------------|------------------------------------------------------------------------------------------------------------------------------------------------------|---------------------------------------------------------------------------------------------------------|
| To the best of your knowledge, what income level is the host country?                         |                                                                                                                                                      | Remove now as we will code countries                                                                    |
| Do restructure of questions so similar are together                                           |                                                                                                                                                      | Do restructure                                                                                          |
|                                                                                               |                                                                                                                                                      |                                                                                                         |
| Add to post-placement                                                                         |                                                                                                                                                      |                                                                                                         |
| Which country was your placement in- free text                                                |                                                                                                                                                      | Add                                                                                                     |
| What support do your volunteers receive?<br><br>A local or western expert to provide feedback | Change to Have access to – move to volunteer post<br><br>Change to: an opportunity to get frequent feedback from a local or western senior colleague | Change to have access to and move to post placement- what support did you have access to?<br><br>Change |
| Are you the only project working in the healthcare facility                                   | Was yours the only project working in the healthcare facility                                                                                        | Change and more to post placement                                                                       |
| Length of stay                                                                                |                                                                                                                                                      | Move length of stay to Post placement                                                                   |
| Recurring visits                                                                              |                                                                                                                                                      | Move to post placement                                                                                  |

## **Table 5: How participants were recruited through collaborative organisations**

| Organisation        | Method of distribution of questionnaire                                                                                       | Target Group        | Number of people that had opportunity to engage                   |
|---------------------|-------------------------------------------------------------------------------------------------------------------------------|---------------------|-------------------------------------------------------------------|
| Ambulance Station 1 | Attended with paper versions                                                                                                  | All groups          | 15                                                                |
| Conference 1        | Handed out paper versions at conference, presented online link at conference, online link sent by contact within organisation | All groups          | Up to 400 on mailing list (who may have also attended conference) |
| Field Hospital 1    | Online link sent by contact within organisation                                                                               | Returned Volunteers | 180                                                               |
| Field Hospital 2    | Online Link sent by contact within organisation                                                                               | Returned Volunteers | 50                                                                |
| Field Hospital 3    | Attended event with paper version                                                                                             | All groups          | 6                                                                 |

|                                  |                                                                                                                       |                                          |                                    |
|----------------------------------|-----------------------------------------------------------------------------------------------------------------------|------------------------------------------|------------------------------------|
| Field Hospitals 4                | Online Link sent by contact within organisation                                                                       | All groups                               | 80                                 |
| General Practice 1               | Attended with paper versions                                                                                          | All groups                               | 4                                  |
| Health Partnership 1             | Online Link sent by contact within organisation                                                                       | Current Volunteers                       | 2                                  |
| Health Partnership 2             | Online Link sent by contact within organisation                                                                       | All groups                               | 6                                  |
| Health Partnership 3             | Online Link sent by contact within organisation, also asked to send to one colleague with no international experience | Returned and no international experience | 50                                 |
| Health Partnership 4             | Online Link sent by contact within organisation                                                                       | Pre Placement                            | Awaiting Response                  |
| Health Partnership 5             | Online Link sent by contact within organisation                                                                       | All groups                               | 6                                  |
| Health Partnership 6             | Online Link sent by contact within organisation                                                                       | All groups                               | 15                                 |
| Hospital 1                       | Online Link sent by contact within organisation                                                                       | All groups                               | 30                                 |
| Hospital 2                       | Attended induction events with paper versions                                                                         | All groups                               | 85                                 |
| Individual Influencer 1          | Posted link to personal twitter and emailed 7 colleagues                                                              | All groups                               | 182 twitter followers 7 colleagues |
| Online Community of Practice 1   | Posted link to Community of Practice Online group                                                                     | All groups                               | 297 members                        |
| Previous Research Participants 1 | Link sent by researcher directly to participants                                                                      | All groups                               | 290                                |
| Previous Research Participants 2 | Link sent directly to email addresses                                                                                 | All groups                               | 59                                 |
| Professional Network 1           | Link distributed in E bulletin                                                                                        | All groups                               | 374 opened link (sent to 1800)     |

|                         |                                                                                                                |                     |                                            |
|-------------------------|----------------------------------------------------------------------------------------------------------------|---------------------|--------------------------------------------|
| Professional Network 2  | Online Link sent by contact within organisation                                                                | All groups          | Awaiting response                          |
| Recruitment Event 1     | Attended event with paper versions                                                                             | All groups          | 15                                         |
| Recruitment Event 2     | Attended event with paper versions                                                                             | All groups          | 18                                         |
| Royal College 1         | Online Link sent by contact within organisation                                                                | Returned Volunteers | 70                                         |
| Royal College 2         | Online link sent by one member to a select few relevant individuals<br>Conference attended with paper versions | Returned Volunteers | 11                                         |
| Royal College 3         | Online Link sent by contact within organisation                                                                | Returned Volunteers | 19                                         |
| Royal College 4         | Link sent directly to group members email addresses                                                            | All groups          | 45                                         |
| Royal College 5         | Online Link sent by contact within organisation                                                                | All groups          | 437                                        |
| Royal College 6         | Link posted on global health facebook group                                                                    | All groups          | 79 in group                                |
| The Royal College 7     | Link posted on blog and to twitter                                                                             | All groups          | 1000 blog followers, 400 twitter followers |
| Trust 1                 | Online Link sent by contact within organisation                                                                | Returned Volunteers | 43                                         |
| University Alumni 1     | Link posted to Facebook, Twitter and LinkedIn groups                                                           | All groups          | 1000+                                      |
| University Department 1 | Online Link sent by contact within organisation (stated was only for qualified health professionals)           | All groups          | 270                                        |

|                         |                                                 |                             |     |
|-------------------------|-------------------------------------------------|-----------------------------|-----|
| University Department 2 | Online Link sent by contact within organisation | No international experience | 21  |
| University Department 3 | Online Link sent by contact within organisation | No international experience | 37  |
| University Department 4 | Paper versions handed out at end of lecture     | All groups                  | 17  |
| University Department 5 | Online Link sent by contact within organisation | All groups                  | 55  |
| University Department 6 | Online Link posted on students forum            | All groups                  | 500 |
| Volunteer Project 1     | Online Link sent by contact within organisation | Current Volunteers          | 9   |
| Volunteer Project 2     | Online Link sent by contact within organisation | All groups                  | 116 |
| Volunteer Project 3     | Online Link sent by contact within organisation | Pre placement               | 5   |
| Volunteer Project 4     | Online Link sent by contact within organisation | All groups                  | 4   |
| Volunteer Project 5     | Online Link sent by contact within organisation | Returned Volunteers         | 35  |

**Table 6: Staff Group x International Experience**

| Staff group                 | Past international experience | Currently internationally working | No experience - interested | No experience - not interested | Planned future international experience |     |
|-----------------------------|-------------------------------|-----------------------------------|----------------------------|--------------------------------|-----------------------------------------|-----|
| Medical and Dental          | 77                            | 20                                | 10                         | 7                              | 32                                      | 146 |
| Nursing and Midwifery       | 51                            | 2                                 | 39                         | 31                             | 13                                      | 136 |
| Allied Health Professionals | 23                            | 4                                 | 12                         | 17                             | 9                                       | 65  |
| Healthcare Scientists       | 6                             | 0                                 | 1                          | 5                              | 1                                       | 13  |
| Ambulance                   | 2                             | 0                                 | 1                          | 10                             | 1                                       | 14  |

|                                           |   |   |   |    |   |    |
|-------------------------------------------|---|---|---|----|---|----|
| Support to clinical staff (HCAs)          | 0 | 0 | 8 | 22 | 0 | 30 |
| NHS infrastructure support                | 1 | 0 | 3 | 1  | 0 | 5  |
| Other scientific, therapeutic & technical | 8 | 0 | 4 | 9  | 5 | 26 |
| Other                                     | 1 | 0 | 0 | 2  | 0 | 3  |

**Table 7 – Correlation coefficients between the latent variables, their standard errors and *p*-values, according to the proposed multidimensional item response theory model.**

|                         | Estimate | S.E.  | <i>p</i> -value<br>(two tailed) |
|-------------------------|----------|-------|---------------------------------|
| LIFE SATISFACTION       | WITH     |       |                                 |
| CONFIDENCE              | 0.295    | 0.045 | 0.000                           |
| CULTURAL                | WITH     |       |                                 |
| CONFIDENCE              | 0.41     | 0.044 | 0.000                           |
| LIFE SATISFACTION       | 0.223    | 0.051 | 0.000                           |
| ADAPTING COMMUNICATION  | WITH     |       |                                 |
| CONFIDENCE              | 0.12     | 0.044 | 0.000                           |
| LIFE SATISFACTION       | 0.223    | 0.049 | 0.000                           |
| CULTURAL                | 0.497    | 0.043 | 0.000                           |
| TEACHING                | WITH     |       |                                 |
| CONFIDENCE              | 0.662    | 0.031 | 0.000                           |
| LIFE SATISFACTION       | 0.208    | 0.049 | 0.000                           |
| CULTURAL                | 0.29     | 0.051 | 0.000                           |
| ADAPTING COMMUNICATION  | 0.319    | 0.048 | 0.000                           |
| DIFFICULT COMMUNICATION | WITH     |       |                                 |
| CONFIDENCE              | 0.518    | 0.035 | 0.000                           |
| LIFE SATISFACTION       | 0.196    | 0.046 | 0.000                           |
| CULTURAL                | 0.412    | 0.045 | 0.000                           |

1  
2  
3  
4  
5  
6  
7  
8  
9  
10  
11  
12  
13  
14  
15  
16  
17  
18  
19  
20  
21  
22  
23  
24  
25  
26  
27  
28  
29  
30  
31  
32  
33  
34  
35  
36  
37  
38  
39  
40  
41  
42  
43  
44  
45  
46  
47  
48  
49  
50  
51  
52  
53  
54  
55  
56  
57  
58  
59  
60

|                         | Estimate | S.E.  | <i>p</i> -value<br>(two tailed) |
|-------------------------|----------|-------|---------------------------------|
| ADAPTING COMMUNICATION  | 0.58     | 0.037 | 0.000                           |
| TEACHING                | 0.44     | 0.04  | 0.000                           |
| BEHAVIOUR CHANGE        | WITH     |       |                                 |
| CONFIDENCE              | 0.638    | 0.027 | 0.000                           |
| LIFE SATISFACTION       | 0.289    | 0.045 | 0.000                           |
| CULTURAL                | 0.397    | 0.051 | 0.000                           |
| ADAPTING COMMUNICATION  | 0.427    | 0.041 | 0.000                           |
| TEACHING                | 0.554    | 0.035 | 0.000                           |
| DIFFICULT COMMUNICATION | 0.558    | 0.035 | 0.000                           |
| MANAGEMENT              | WITH     |       |                                 |
| CONFIDENCE              | 0.563    | 0.035 | 0.000                           |
| LIFE SATISFACTION       | 0.113    | 0.051 | 0.025                           |
| CULTURAL                | 0.367    | 0.051 | 0.000                           |
| ADAPTING COMMUNICATION  | 0.436    | 0.043 | 0.000                           |
| TEACHING                | 0.545    | 0.036 | 0.000                           |
| DIFFICULT COMMUNICATION | 0.54     | 0.038 | 0.000                           |
| BEHAVIOUR CHANGE        | 0.364    | 0.044 | 0.000                           |
| TEAM WORK               | WITH     |       |                                 |
| CONFIDENCE              | 0.757    | 0.028 | 0.000                           |
| LIFE SATISFACTION       | 0.362    | 0.049 | 0.000                           |
| CULTURAL                | 0.497    | 0.047 | 0.000                           |
| ADAPTING COMMUNICATION  | 0.522    | 0.043 | 0.000                           |
| TEACHING                | 0.577    | 0.037 | 0.000                           |
| DIFFICULT COMMUNICATION | 0.653    | 0.036 | 0.000                           |
| BEHAVIOUR CHANGE        | 0.658    | 0.034 | 0.000                           |
| MANAGEMENT              | 0.696    | 0.032 | 0.000                           |
| FLEXIBILITY             | WITH     |       |                                 |
| CONFIDENCE              | 0.571    | 0.033 | 0.000                           |
| LIFE SATISFACTION       | 0.198    | 0.044 | 0.000                           |

|                         | Estimate | S.E.  | <i>p</i> -value<br>(two tailed) |
|-------------------------|----------|-------|---------------------------------|
| CULTURAL                | 0.492    | 0.039 | 0.000                           |
| ADAPTING COMMUNICATION  | 0.475    | 0.04  | 0.000                           |
| TEACHING                | 0.423    | 0.041 | 0.000                           |
| DIFFICULT COMMUNICATION | 0.497    | 0.038 | 0.000                           |
| BEHAVIOUR CHANGE        | 0.514    | 0.034 | 0.000                           |
| MANAGEMENT              | 0.527    | 0.036 | 0.000                           |
| TEAM WORK               | 0.705    | 0.03  | 0.000                           |
