# Supplementary material for: Measuring the outcomes of volunteering for education: development and pilot of a tool to assess healthcare professionals’ personal and professional development from international volunteering
Source: PubMed Central journal article supplement — BMJ Open. 2019 Jul 17;9(7):e028206. doi: 10.1136/bmjopen-2018-028206 (PMC6661697; doi:10.1136/bmjopen-2018-028206), 2019-07-17
Supplement: bmjopen-2018-028206supp001.pdf [file bmjopen-2018-028206supp001.pdf]

## **Additional Files: Tables**

### **Table 1: Each core outcome and how it was used in the tool**

| CORE OUTCOME                                                                                                                                                                                                                                                                    | INCLUDE/REMOVE/COMBINE | Reason/changed to/combined into                                                                                                |
|---------------------------------------------------------------------------------------------------------------------------------------------------------------------------------------------------------------------------------------------------------------------------------|------------------------|--------------------------------------------------------------------------------------------------------------------------------|
| INCREASED AWARENESS OF/KNOWLEDGE ABOUT CULTURAL DIFFERENCES AND SIMILARITIES (e.g., understanding key issues within a culture, culturally acceptable behaviour and cultures of UK immigrants, learning about, accepting and changing assumptions about other cultures)          | COMB                   | I have demonstrated a good awareness about how cultural differences influence health                                           |
| INCREASED AWARENESS OF/KNOWLEDGE ABOUT THE CULTURAL ASPECTS OF HEALTH (e.g., greater understanding of health promotion, how culture affects daily life and professional work, cultural differences in health, the effects of politics on health, sustainable healthcare)        | COMB                   | I have demonstrated a good awareness about how cultural differences influence health                                           |
| ABILITY TO WORK WITH LIMITED RESOURCES (e.g., being more resourceful, ability to target resources, ability to find solutions despite limited resources, making use of everything available, ability to work without reliance on technology, manage in a low resource setting)   | COMB                   | I have frequently had to find solutions despite limited resources                                                              |
| INCREASED AWARENESS OF/KNOWLEDGE ABOUT CULTURE IN PRACTICAL ASSESSMENTS (e.g., the importance of collecting relevant cultural information about people's presenting health problems and learning how to conduct cultural assessments and culturally based physical assessments) | INC                    |                                                                                                                                |
| ABILITY TO APPLY CLINICAL SKILLS TO ANOTHER CONTEXT (e.g., a more challenging environment or a low resource setting)                                                                                                                                                            | INC                    |                                                                                                                                |
| ABILITY TO BE ADAPTABLE AND INNOVATIVE IN TEACHING (e.g., ability to transfer skills and knowledge to the most influential people or to another context, recognising different learning styles, being adaptable in assessment)                                                  | INC                    |                                                                                                                                |
| INCREASED AWARENESS OF/KNOWLEDGE ABOUT HOW OTHER HEALTHCARE SYSTEMS FUNCTION (e.g., developed insight into disparities within healthcare systems, understanding of other systems)                                                                                               | INC                    |                                                                                                                                |
| ABILITY TO COPE (e.g., improved coping strategies, ability to deal with lack of structure, knock backs and stress, being unfazed by things and taking things in stride, new approach to guilt for patients problems)                                                            | INC                    |                                                                                                                                |
| INCREASED CULTURAL SENSITIVITY (e.g., sensitivity to reasoning behind cultural differences, feelings of minority and language barriers)                                                                                                                                         | COMB                   | I have frequently demonstrated cultural sensitivity (e.g. understanding that words and behaviours can have different meanings) |
| UNDERSTANDING THAT WORDS AND BEHAVIOURS CAN HAVE DIFFERENT MEANINGS (e.g., understanding how words are perceived by others, understanding how to speak and behave so as not offend people)                                                                                      | COMB                   | I have frequently demonstrated cultural sensitivity (e.g. understanding that words and behaviours can have different meanings) |

|                                                                                                                                                                                                                                                                                      |      |                                                                                                                                                  |
|--------------------------------------------------------------------------------------------------------------------------------------------------------------------------------------------------------------------------------------------------------------------------------------|------|--------------------------------------------------------------------------------------------------------------------------------------------------|
| ABILITY TO APPLY KNOWLEDGE ACROSS SYSTEMS (e.g., ability to apply knowledge from host system to UK and vice versa, using knowledge gained in system to improve/change another)                                                                                                       | INC  |                                                                                                                                                  |
| DEVELOPMENT OF A NEW PERSPECTIVE (e.g., revising assumptions, seeing things differently, changed world views and outlook, look at everything in a new light, openness to new experiences, put things into perspective)                                                               | INC  |                                                                                                                                                  |
| IMPROVED FLEXIBILITY AND ADAPTABILITY (e.g., acceptance of other ways of working, adaptation to responsibility, being able to adapt more easily to unfamiliar situations, able to cope more easily with change, gaining a wider perspective, understanding the flexibility of roles) | INC  |                                                                                                                                                  |
| ABILITY TO BE INNOVATE WHEN OVERCOMING CHALLENGES (i.e., finding unique ways of overcoming cultural and language challenges)                                                                                                                                                         | COMB | I have frequently had to find solutions despite limited resources                                                                                |
| INCREASED RESPECT FOR OTHER CULTURES                                                                                                                                                                                                                                                 | COMB | I have demonstrated a good awareness about how cultural differences influence health                                                             |
| INCREASED UNDERSTANDING OF BASIC SKILLS AND IDEAS (i.e., back to basics, e.g., basic observations using eyes, less reliance on lab tests and technology, basic clinical skills and science)                                                                                          | COMB | I have relied heavily on the basic skills of my profession (e.g. physical examination)                                                           |
| CONFIDENCE IN TEACHING ABILITY (e.g., being more comfortable around others, confidence public speaking, confidence in transferring knowledge)                                                                                                                                        | COMB | In the last month I have demonstrated that I'm a good teacher<br><br>I am confident in my ability to teach others                                |
| IMPROVED CONFIDENCE (e.g., in caring for clients from another culture, in quality improvement methods, to take bolder steps, to address challenging situations, self-confidence, confidence in professional ability,)                                                                | INC  |                                                                                                                                                  |
| CONFIDENCE TO WORK IN OTHER LOCATIONS (e.g., confidence to move to another city/country, working with UK multicultural/ underserved populations)                                                                                                                                     | INC  |                                                                                                                                                  |
| INCREASED AWARENESS OF/KNOWLEDGE ABOUT GLOBAL ISSUES (e.g., re-evaluating world issues, shared purpose)                                                                                                                                                                              | INC  |                                                                                                                                                  |
| INCREASED AWARENESS OF/KNOWLEDGE ABOUT CONDITIONS AND PROCEDURES RARELY ENCOUNTERED IN THE UK (e.g., greater understanding of procedures not used in the UK, unfamiliar equipment and delayed presentations, better management of conditions that are not common in the UK)          | COMB | I have a good knowledge of conditions and procedures rarely encountered in the UK (e.g. tropical diseases, delayed presentations, old equipment) |
| INCREASED AWARENESS OF/KNOWLEDGE ABOUT TROPICAL DISEASES                                                                                                                                                                                                                             | COMB | I have a good knowledge of conditions and procedures rarely encountered in the UK (e.g. tropical diseases, delayed presentations, old equipment) |
| INCREASED AWARENESS OF/KNOWLEDGE ABOUT THE IMPORTANCE OF MUTUAL LEARNING AND RESPECT (i.e., greater understanding of reciprocal learning)                                                                                                                                            | INC  |                                                                                                                                                  |
| ABILITY TO BE ADAPTABLE IN LEADING (e.g., able to lead in complex novel situations, ability to compromise not dictate)                                                                                                                                                               | INC  |                                                                                                                                                  |
| ABILITY TO WORK WITHIN A SYSTEM WITH UNFAMILIAR POWER DYNAMICS                                                                                                                                                                                                                       | INC  |                                                                                                                                                  |
| ABILITY TO ADAPT SOCIAL NORMS TO MEET NEEDS OF ANOTHER CULTURE (e.g., change behaviours to fit into another culture, being aware of own social norms and adapting them)                                                                                                              | INC  |                                                                                                                                                  |
| ABILITY TO EXCHANGE IDEAS WITH THOSE FROM ANOTHER CULTURE                                                                                                                                                                                                                            | INC  |                                                                                                                                                  |

|                                                                                                                                                                                                                                                         |      |                                                                                                                   |
|---------------------------------------------------------------------------------------------------------------------------------------------------------------------------------------------------------------------------------------------------------|------|-------------------------------------------------------------------------------------------------------------------|
| INCREASED SELF-AWARENESS (e.g., understanding own skills and limitations, how to challenge own beliefs and importance of reflecting on own situation)                                                                                                   | INC  |                                                                                                                   |
| PATIENCE AND TOLERANCE (e.g., accepting and working at other peoples pace, more tolerant)                                                                                                                                                               | INC  |                                                                                                                   |
| PROACTIVITY (e.g., thinking on feet, using initiative, efficiency, get on with things rather than look for someone to blame)                                                                                                                            | INC  |                                                                                                                   |
| ABILITY TO WORK WITH RESOURCES AVAILABLE IN SPECIFIC CONTEXTS (i.e., understanding the reasons behind lack of resources)                                                                                                                                | COMB | I have frequently had to find solutions despite limited resources                                                 |
| ABILITY TO WORK TOWARDS SOLUTIONS (e.g., solution focused approach)                                                                                                                                                                                     | INC  |                                                                                                                   |
| UNDERSTANDING THAT SPEED AND LANGUAGE COMPETENCY AFFECT COMMUNICATION (e.g., awareness of how speed affects comprehension, understanding language differences and checking recipient comprehension, ability to use an interpreter)                      | INC  |                                                                                                                   |
| INCREASED AWARENESS OF/KNOWLEDGE ABOUT THE IMPORTANCE OF COMMUNITY PARTICIPATION IN HEALTH (e.g., understanding the community and social influences on health, the role of the community in health, public health and the importance of community work) | INC  |                                                                                                                   |
| ABILITY TO USE A BROADER RANGE OF CLINICAL SKILLS (e.g., enhancing existing skills and acquiring new clinical skills, greater all round competence)                                                                                                     | INC  |                                                                                                                   |
| UNDERSTANDING THAT CHANGING BEHAVIOUR IS COMPLEX (e.g., understanding how to make small changes and not to force your perspective onto others,)                                                                                                         | COMB | In my work I have demonstrated skills in changing patients' or colleagues' behaviours                             |
| ABILITY TO IMPROVE SERVICE (e.g., renewed enthusiasm for service improvement)                                                                                                                                                                           | INC  |                                                                                                                   |
| INCREASED STAFF KNOWLEDGE AND SKILLS (e.g., increased staff knowledge of low cost healthcare, more knowledgeable staff able to cover more areas, to discover better ways of doing things and more aware of waste reduction)                             | REM  | too vague and not based on individual                                                                             |
| INCREASED AWARENESS OF/KNOWLEDGE ABOUT HOW CONTEXT AFFECTS COMMUNICATION (e.g., effectively conveying ideas in a contextually appropriate way)                                                                                                          | INC  |                                                                                                                   |
| INCREASED AWARENESS OF/KNOWLEDGE ABOUT THE NEED FOR AND IMPORTANCE OF TRAINING (i.e., understanding how important effective training is in)                                                                                                             | INC  |                                                                                                                   |
| IMPROVEMENT IN TEACHING SKILLS (e.g., learning new techniques, greater training delivery skills, lecturing skills and small group teaching skills)                                                                                                      | COMB | In the last month I have demonstrated that I'm a good teacher<br><br>I am confident in my ability to teach others |
| ABILITY TO DEAL WITH THE UNEXPECTED                                                                                                                                                                                                                     | INC  |                                                                                                                   |
| ABILITY TO MANAGE PROJECTS                                                                                                                                                                                                                              | INC  |                                                                                                                   |
| DEEPER ENGAGEMENT WITH ISSUES OF EQUALITY AND DIVERSITY                                                                                                                                                                                                 | INC  |                                                                                                                   |
| ABILITY TO OVERCOME COMMUNICATION CHALLENGES (e.g., ability to communicate effectively in high pressure situations, engage in challenging conversations and liaise between groups)                                                                      | INC  |                                                                                                                   |
| ABILITY TO BE INNOVATIVE WITH CLINICAL SKILLS (e.g., use of innovative techniques, finding new ways to approach a condition, new ways of working)                                                                                                       | INC  |                                                                                                                   |

|                                                                                                                                                                                                                             |      |                                                                                 |
|-----------------------------------------------------------------------------------------------------------------------------------------------------------------------------------------------------------------------------|------|---------------------------------------------------------------------------------|
| APPRECIATION OF HAVING THE RIGHT TOOLS AND EQUIPMENT TO BE ABLE TO DO THE JOB (i.e., resources: technical equipment, disposal equipment, cleaning products and protective equipment)                                        | COMB | I have frequently had to find solutions despite limited resources               |
| APPRECIATION OF EXCELLENT HUMAN RESOURCE IN THE NHS (e.g., multidisciplinary TEAM WORKs, HR structures, appreciation of own profession, understanding hierarchy and the importance of each person within it)                | INC  |                                                                                 |
| IMPROVED EMOTIONAL INTELLIGENCE (e.g., changed engagement with self, knowledge and world)                                                                                                                                   | INC  |                                                                                 |
| ABILITY TO IDENTIFY AND ANTICIPATE POTENTIAL PROBLEMS (e.g., identify problems when setting up a new project)                                                                                                               | INC  |                                                                                 |
| INCREASED AWARENESS OF/KNOWLEDGE ABOUT APPROPRIATE CLINICAL BEHAVIOUR (e.g., knowing when to stop and when to move forward, when to ask for help and different populations needs)                                           | INC  |                                                                                 |
| ABILITY TO MAKE INDEPENDENT CLINICAL DECISIONS (e.g., ability to make an urgent decision in an emergency, dealing with uncertain outcomes, evaluating risks to patients and self)                                           | COMB | I am confident in my ability to make appropriate independent clinical decisions |
| UNDERSTANDING OWN POTENTIAL TO EMPOWER PEOPLE                                                                                                                                                                               | INC  |                                                                                 |
| ABILITY TO WORK AS PART OF A TEAM WORK (e.g., understanding TEAM WORK group norms, perception of roles within the group, managing personal objectives within a group)                                                       | INC  |                                                                                 |
| ABILITY TO BUILD A GLOBAL NETWORK                                                                                                                                                                                           | INC  |                                                                                 |
| ABILITY TO DISSEMINATION BEST PRACTICE GLOBALLY                                                                                                                                                                             | INC  |                                                                                 |
| APPRECIATION OF FREE UNIVERSAL HEALTH (e.g., the NHS system of free healthcare for all, privilege and opportunity, the expectations that are placed on NHS by service users)                                                | INC  |                                                                                 |
| IMPROVED SITUATIONAL AWARENESS (i.e., understanding your environment so you can understand what to do)                                                                                                                      | REM  | Research suggests self-report does not measure this effectively                 |
| INCREASED JOB SATISFACTION (e.g., increased motivation and morale within profession, renewed passion for work, sense of reward)                                                                                             | INC  |                                                                                 |
| PERSONAL SATISFACTION (e.g., personal achievements and challenges, new experiences, experiencing a different lifestyle, a holiday, appreciation of own life, personal fulfilment)                                           | INC  |                                                                                 |
| CAN-DO ATTITUDE                                                                                                                                                                                                             | INC  |                                                                                 |
| ABILITY TO PROVIDE BETTER CARE (e.g., ability to integrate primary and secondary care, to provide multicultural care, to develop most effective approaches to care and taking responsibility for providing quality of care) | INC  |                                                                                 |
| ABILITY TO CO-OPERATE (e.g., willingness to see another point of view)                                                                                                                                                      | INC  |                                                                                 |
| APPRECIATION OF CLINICAL GOVERNANCE PROCEDURES WITHIN NHS (e.g., waste disposal, audit, TEAM WORKwork, education system, tests and investigations)                                                                          | COMB | I have thought about and appreciated clinical governance                        |
| APPRECIATION OF THE IMPORTANCE OF CARE AND COMPASSION (e.g., ability to compare compassion in both systems, empathy and fairness)                                                                                           | INC  |                                                                                 |
| INCREASED AWARENESS OF/KNOWLEDGE ABOUT THE POSITIVE IMPACT OF CLINICAL POLICIES AND GOVERNANCE (e.g., understanding the benefits of a comprehensive checklist)                                                              | COMB | I have thought about and appreciated clinical governance                        |
| INCREASED AWARENESS OF/KNOWLEDGE ABOUT ETHICS (i.e., experiencing ethical dilemmas, understanding the importance of ethics)                                                                                                 | COMB | I have frequently experienced ethical dilemmas                                  |

|                                                                                                                                                                                                                                                                                                          |      |                                                                                        |
|----------------------------------------------------------------------------------------------------------------------------------------------------------------------------------------------------------------------------------------------------------------------------------------------------------|------|----------------------------------------------------------------------------------------|
| CHANGED PERCEPTION OF OTHERNESS (e.g., understanding importance of being a friendly stranger in UK, feeling like a foreigner)                                                                                                                                                                            | INC  |                                                                                        |
| INTEGRITY                                                                                                                                                                                                                                                                                                | REM  | Too vague                                                                              |
| INDEPENDENCE (e.g., lone working)                                                                                                                                                                                                                                                                        | INC  |                                                                                        |
| ABILITY TO PLAN AND ORGANISE (e.g., ability to set direction, improved audit skills)                                                                                                                                                                                                                     | INC  |                                                                                        |
| ABILITY TO MAKE DECISIONS (e.g., understanding who the decision is for, taking action on decision, making judgements)                                                                                                                                                                                    | COMB | I am confident in my ability to make appropriate independent clinical decisions        |
| ABILITY TO MANAGE RISK (e.g., manage risk in advance, evaluation of environment, understanding the clinical importance of risk management and the wider implication of poorly managed risk)                                                                                                              | INC  |                                                                                        |
| INCREASED PATIENT SATISFACTION (e.g., staff better able to respond to UK multicultural populations, staff able to compare how systems affect patient satisfaction, have greater relationships with multicultural population, more in tune with patients and more aware of individual needs of patients). | REM  | Cannot be measured in professional self-reports alone                                  |
| ABILITY TO COMMUNICATE NON-VERBALLY                                                                                                                                                                                                                                                                      | INC  |                                                                                        |
| ABILITY TO ESTABLISH COMMUNICATION SYSTEMS (e.g., formal and informal)                                                                                                                                                                                                                                   | INC  |                                                                                        |
| INCREASED CLINICAL KNOWLEDGE IN RELATION TO OTHER PROFESSIONS (e.g., doctors understanding nurses and vice versa, multi-disciplinary awareness)                                                                                                                                                          | INC  |                                                                                        |
| ABILITY TO GET THE MOST OUT OF PEOPLE (e.g., encouraging people to work together, recognise their own strengths and to take possession of their own work/projects, ability to assess the capability of others)                                                                                           | INC  |                                                                                        |
| ABILITY TO MANAGE PEOPLE (e.g., able to allocate tasks and co-ordinate people, to deal with people with differing objectives, to negotiate with multiple stakeholders, to manage difficult people)                                                                                                       | COMB | Colleagues have noticed my abilities to manage difficult people                        |
| ABILITY TO DEVELOP FRIENDSHIPS (e.g., relationship formation skills, developing new friendships)                                                                                                                                                                                                         | INC  |                                                                                        |
| ABILITY TO MANAGE SELF (e.g., own expectations, self-reliance, self-management, self-assurance, reflexivity)                                                                                                                                                                                             | INC  |                                                                                        |
| CHANGED JUDGEMENT (e.g., non-judgemental attitude, changed self-judgement)                                                                                                                                                                                                                               | INC  |                                                                                        |
| DIPLOMACY                                                                                                                                                                                                                                                                                                | REM  | Too vague                                                                              |
| ABILITY TO FIND FACTS TO SOLVE PROBLEMS                                                                                                                                                                                                                                                                  | INC  |                                                                                        |
| DEVELOPING REDUNDANT OR BAD SKILLS/ATTITUDES (e.g., developing non-transferable skills, bad habits, deskilling, returning with overconfidence in own ability, poorer communication skills, loss of confidence)                                                                                           | INC  |                                                                                        |
| FINANCIAL LOSS (e.g., costs of getting involved, loss of earnings, pension or employment entitlement)                                                                                                                                                                                                    | REM  | Too contextual- add to variables                                                       |
| REDUCTION IN NHS DROP OUTS (e.g., increased staff retention, when they volunteer and come back to NHS)                                                                                                                                                                                                   | REM  | Cannot be measured in professional self-reports alone                                  |
| ABILITY TO OBSERVE AND EXAMINE PATIENTS (e.g., increased intuitive knowledge of clinical signs and clinical judgement ability to make diagnosis without investigations)                                                                                                                                  | COMB | I have relied heavily on the basic skills of my profession (e.g. physical examination) |
| ABILITY TO WORK IN A PROFESSIONALLY COMPETENT WAY (e.g., having wider view of profession, intellectual development, reminder of professional responsibilities, stronger work ethic)                                                                                                                      | REM  | Too vague                                                                              |
| INCREASED UNDERSTANDING OF HOW TO BE A GOOD TEACHER (e.g., allowing students to learn from mistakes, ability to suggest and acknowledge improvements in teaching,                                                                                                                                        | COMB | In the last month I have demonstrated that I'm a good teacher                          |

|                                                                                                                                                                                                                                              |       |                                                                                                                                         |
|----------------------------------------------------------------------------------------------------------------------------------------------------------------------------------------------------------------------------------------------|-------|-----------------------------------------------------------------------------------------------------------------------------------------|
| understanding how communication affects learning, how to target training most effectively and the importance of experiential learning)                                                                                                       |       | I am confident in my ability to teach others                                                                                            |
| ACT AS A ROLE MODEL (e.g., lead by example)                                                                                                                                                                                                  | INC   |                                                                                                                                         |
| INFLUENCES CAREER PATHWAY (i.e., affects specialism choice, exploration of potential career pathways, pursuing careers in primary care, family practice, public service, sub-specialism in global health, teaching)                          | REM   | Went into variables                                                                                                                     |
| ABILITY TO MANAGE TIME AND PRIORITISE (e.g., ability to respond quickly in an emergency, managing immediate need vs long term need, prioritisation of limited resources)                                                                     | CHANG | In my ability to manage myself and prioritise (e.g. time management, managing emotions, responding an emergency, prioritising workload) |
| INCREASED ABILITY TO CHANGE BEHAVIOUR IN COLLEAGUES OR PATIENTS (e.g., ability to implement behaviour change and to assess the impact of healthcare systems)                                                                                 | COMB  | In my work I have demonstrated skills in changing patients' or colleagues' behaviours                                                   |
| ABILITY TO MANAGE TRAGEDIES                                                                                                                                                                                                                  | INC   |                                                                                                                                         |
| EXPOSURE TO ETHICAL DILEMMAS (e.g., expected to work outside of competency, to do clinical work, little regulation, little supervision, too much responsibility)                                                                             | COMB  | I have frequently experienced ethical dilemmas                                                                                          |
| REDUCTION IN STAFF COMPETENCE (e.g., brain drain reversal: NHS loss of competent staff to overseas placements, staff unable to cope with paperwork on return)                                                                                | REM   | Cannot be measured in professional self-reports alone                                                                                   |
| NO RECOGNITION OR ACCREDITATION UPON RETURN                                                                                                                                                                                                  | REM   | Put into variables                                                                                                                      |
| INCREASED INTERNATIONAL REPUTATION OF NHS (e.g., greater fulfilment of social responsibility)                                                                                                                                                | REM   | Cannot be measured in professional self-reports alone                                                                                   |
| INCREASED INTERNATIONAL REPUTATION (of UK)                                                                                                                                                                                                   | REM   | Cannot be measured in professional self-reports alone                                                                                   |
| ABILITY TO VERBALISE KNOWLEDGE (e.g., ability to verbalise core concepts and deep knowledge, ability to explain complex ideas to others)                                                                                                     | INC   |                                                                                                                                         |
| INCREASED AWARENESS OF/KNOWLEDGE ABOUT THE IMPORTANCE OF TRUST BETWEEN COLLEAGUES WITHIN HEALTHCARE SYSTEMS                                                                                                                                  | INC   |                                                                                                                                         |
| INCREASED AWARENESS OF AND KNOWLEDGE THE FUNCTIONING OF SYSTEMS (e.g., able to identify stakeholders and change agents, understanding influencing patterns of those in power, value systems and the difficulty of questioning organisations) | INC   |                                                                                                                                         |
| REFRESHMENT AND REINVIGORATION (e.g., chance to take time away to become refreshed and feel reinvigorated to work upon return)                                                                                                               | INC   |                                                                                                                                         |
| ABILITY TO MANAGE HEALTHCARE ENVIRONMENTS (e.g., ability to manage wards and staff)                                                                                                                                                          | COMB  | Colleagues have noticed my abilities to manage difficult people                                                                         |
| INCREASED AWARENESS OF/KNOWLEDGE ABOUT THE IMPORTANCE OF CONSCIOUSLY MAKING AN EFFORT TO GET ON WITH COLLEAGUES (e.g., learning colleague's names)                                                                                           | INC   |                                                                                                                                         |
| INCREASED AWARENESS OF/KNOWLEDGE ABOUT THE COSTS OF HEALTHCARE                                                                                                                                                                               | INC   |                                                                                                                                         |
| ABILITY TO ACCEPT AND UNDERSTAND FAILURE (e.g., to continue with something that did not have desired outcome at first, learning to accept failure, thinking differently about failure, persistence)                                          | INC   |                                                                                                                                         |
| HUMILITY (including professional humility)                                                                                                                                                                                                   | INC   |                                                                                                                                         |
| ABILITY TO THINK THROUGH PROBLEMS IN A LOGICAL WAY (e.g., analytical/lateral thinking)                                                                                                                                                       | INC   |                                                                                                                                         |

|                                                                                                                                       |     |                                                       |
|---------------------------------------------------------------------------------------------------------------------------------------|-----|-------------------------------------------------------|
| ABILITY TO ENGAGE SENIOR PEOPLE                                                                                                       | INC |                                                       |
| HEALTH CONSEQUENCES (e.g., animal bites, tropical diseases, STDs, injuries and transport accidents, infection, jet lag, skin disease) | REM | Went into variables                                   |
| EXTREME NATIONALISM TOWARDS UK                                                                                                        | INC |                                                       |
| LOSS OF INTEREST IN PROFESSION (e.g., not wanting to work in your profession when home)                                               | INC |                                                       |
| NHS BECOMES A MORE ATTRACTIVE EMPLOYER (e.g., an employer that offers staff the opportunity to volunteer)                             | REM | Cannot be measured in professional self-reports alone |
| INCREASED WORKFORCE PRODUCTIVITY                                                                                                      | REM | Cannot be measured in professional self-reports alone |

**Table 2: Construct used to frame statement**

| Statement                                                                                                | Area of Interest         |
|----------------------------------------------------------------------------------------------------------|--------------------------|
| awareness about how cultural differences influence health                                                | Experience               |
| ability to find solutions despite limited resources                                                      | Confidence               |
| find solutions despite limited resources                                                                 | Experience<br>Confidence |
| conscious of culture when working with patients (e.g. the importance of collecting cultural information) | Attitudes                |
| ability to apply clinical skills to another context                                                      | Confidence               |
| teach clinical colleagues                                                                                | Experience               |
| adapt the way I teach to make it more valuable                                                           | Experience               |
| knowledge about how healthcare systems outside of the UK function                                        | Attitudes                |
| ability to cope in work (e.g. ability to deal with stress)                                               | Experience               |
| cultural sensitivity (e.g. understanding that words and behaviours can have different meanings)          | Experience               |
| apply my clinical knowledge in any health system                                                         | Confidence               |
| developed a new perspective (e.g. changed my outlook)                                                    | Experience               |
| ability to adapt and be flexible in work                                                                 | Confidence<br>Experience |
| thinking about basic sciences (e.g. physiology, cell biological, biochemistry)                           | Experience               |
| relied basic skills profession (e.g. physical examination)                                               | Experience               |
| rely more on laboratory tests than physical examination                                                  | Attitudes                |
| confident in workplace                                                                                   | Confidence               |
| confident to work in another country                                                                     | Confidence               |
| knowledge about global issues                                                                            | Attitudes                |

|                                                                                                                                    |                          |
|------------------------------------------------------------------------------------------------------------------------------------|--------------------------|
| knowledge of conditions and procedures rarely encountered in the UK (e.g. tropical diseases, delayed presentations, old equipment) | Attitudes                |
| ability to work within an unfamiliar power dynamic                                                                                 | Confidence               |
| adapting my social norms to meet the needs of another culture                                                                      | Experience               |
| leader in work                                                                                                                     | Experience               |
| my abilities to be adaptable and innovative as a leader                                                                            | Confidence               |
| thought about my own skills, limitations and beliefs                                                                               | Experience               |
| patient and tolerant                                                                                                               | Experience               |
| proactive at work (e.g. used my initiative, got on with things, thought on feet)                                                   | Experience               |
| someone who focuses on solutions not problems                                                                                      | Attitudes                |
| changed the way I speak so that somebody can understand me                                                                         | Experience               |
| community participation is crucial for the health of the individual                                                                | Attitudes                |
| clinical skills that I have hardly ever used before                                                                                | Experience               |
| difficult to change someone else's behaviour                                                                                       | Attitudes                |
| skills in changing patients' or colleagues' behaviours                                                                             | Experience               |
| improved the healthcare service I work in                                                                                          | Experience               |
| changed the way I communicate to make it more contextually appropriate                                                             | Experience               |
| good teacher                                                                                                                       | Experience               |
| ability to deal with the unexpected                                                                                                | ConfidenceExperience     |
| ability to manage projects                                                                                                         | Confidence<br>Experience |
| deeply engaged with issues and equality and diversity                                                                              | Attitudes                |
| highly skilled in challenging conversations and effective communication, even in high pressure situations                          | Experience               |
| glad that I have access to the right tools and equipment to do my job                                                              | Experience               |
| thought about and appreciated the excellent TEAM WORKs, structures and individuals I work with in the NHS                          | Experience               |
| good understanding of my own thoughts, feelings and behaviours                                                                     | Attitudes                |
| I am good at anticipating future problems                                                                                          | Experience               |
| ability to make appropriate independent clinical decisions                                                                         | Confidence               |
| ability to empower others to help themselves                                                                                       | Attitudes                |
| good at working as part of TEAM WORK                                                                                               | Experience               |



|                                                                                           |                          |
|-------------------------------------------------------------------------------------------|--------------------------|
| professional network that includes people from all over the world                         | Attitudes                |
| confident in my ability to disseminate UK best clinical practice globally                 | Confidence               |
| thought about and appreciated free universal health                                       | Experience               |
| gone about my daily work in a fairly automatic way                                        | Experience               |
| satisfied in job                                                                          | Attitudes                |
| satisfied in personal life                                                                | Attitudes                |
| 'can-do' attitude                                                                         | Experience               |
| provide excellent, high quality care                                                      | Experience               |
| willingness to see someone else's point of view                                           | Experience               |
| thought about and appreciated clinical governance                                         | Experience               |
| thought about and appreciated the importance of care and compassion                       | Experience               |
| experienced ethical dilemmas                                                              | Experience               |
| appropriately manage ethical dilemmas                                                     | Confidence               |
| experiences of feeling like an outsider                                                   | Attitudes                |
| abilities to work independently when necessary                                            | Confident                |
| abilities in planning and organisation                                                    | Experience               |
| actively manage risk, including anticipating risk and evaluating my environment           | Experience               |
| to rely on my non-verbal communication                                                    | Experience               |
| establish communication systems (formal or informal)                                      | Experience               |
| understanding of the roles and responsibilities of all the professional staff I work with | Attitudes                |
| capable of 'getting the most out of people' e.g., encouraging them and empowering them    | Attitudes                |
| managed difficult people                                                                  | Experience<br>Confidence |
| allocated tasks and co-ordinated colleagues                                               | Experience<br>Confidence |
| developing friendships and social relationships                                           | Attitudes                |
| ability to manage myself, including self-reliance and reflexivity                         | Confidence               |
| quick to judge other people                                                               | Attitudes                |
| developed bad habits in work                                                              | Experience               |
| lost some confidence in my clinical practice                                              | Experience               |
| work ethic                                                                                | Attitudes                |
| act as a good role model at work                                                          | Attitudes                |

|                                                                                                     |                          |
|-----------------------------------------------------------------------------------------------------|--------------------------|
| manage situations that I consider to be a tragedy                                                   | Experience<br>Confidence |
| ability to explain complex ideas to others                                                          | Experience               |
| trust between colleagues is crucial in healthcare systems                                           | Attitudes                |
| good understanding of organisations e.g., identifying change agents and understanding who has power | Attitudes                |
| work has made me feel refreshed and reinvigorated                                                   | Experience               |
| consciously make an effort to get on with colleagues e.g. learning everybody's name                 | Attitudes                |
| aware of the financial costs of healthcare                                                          | Experience               |
| persistent in the face of failure                                                                   | Attitudes                |
| accept failure as a part of learning                                                                | Attitudes                |
| direct and positive communication with senior people in the organisation I have been working in     | Experience               |
| the UK is the best country in the world                                                             | Attitudes                |

**Table 3: Variables from systematic review and when they were presented t**

| <b><u>Variable</u></b>                                   | <b><u>Presented</u></b> |
|----------------------------------------------------------|-------------------------|
| Type of project (Charity, profit making, non-for-profit) | To project manager      |
| Professionals involved in project                        | To project manager      |
| Volunteer recruitment                                    | To project manager      |
| Continuity of visits                                     | To project manager      |
| Number of British professionals in country at each time  | To project manager      |
| Logistical organisation                                  | To project manager      |
| Project funding                                          | To project manager      |
| Volunteer/British Professional funding                   | To project manager      |
| Local funding                                            | To project manager      |
| Volunteer activities                                     | To project manager      |
| Organisational support                                   | To project manager      |
| Preparation                                              | To project manager      |
| Learning objectives                                      | To project manager      |
| Evaluation and reflection                                | To project manager      |
| Risk Assessments                                         | To project manager      |

|                                                                      |                              |
|----------------------------------------------------------------------|------------------------------|
| Local needs assessment                                               | To project manager           |
| Who is involved in development of aims, focus, structure of project  | To project manager           |
| Relationships with receiving organisation                            | To project manager           |
| Importance of sustainability, capacity building and service delivery | To project manager           |
| Project name, company and location                                   | Pre-placement questionnaire  |
| Employment immediately before trip                                   | Pre-placement questionnaire  |
| Use of annual leave                                                  | Pre-placement questionnaire  |
| Motivation                                                           | Pre-placement questionnaire  |
| Support                                                              | Pre-placement questionnaire  |
| Comfort working outside of competence or in a high situation         | Pre-placement questionnaire  |
| Expectations of impact                                               | Pre-placement questionnaire  |
| Professional knowledge                                               | Pre-placement questionnaire  |
| Length of stay                                                       | Post-placement questionnaire |
| Project engagement                                                   | Post-placement questionnaire |
| Learning host language                                               | Post-placement questionnaire |
| Utilisation of skills                                                | Post-placement questionnaire |
| Number of Interactions with patients                                 | Post-placement questionnaire |
| Conditions experienced                                               | Post-placement questionnaire |
| Understanding of local context                                       | Post-placement questionnaire |
| Similarities to UK                                                   | Post-placement questionnaire |
| Transferability of skills to UK                                      | Post-placement questionnaire |
| Opportunities                                                        | Post-placement questionnaire |
| Local staff                                                          | Post-placement questionnaire |

|                                                |                              |
|------------------------------------------------|------------------------------|
| Negative consequences                          | Post-placement questionnaire |
| Cost of placement                              | Post-placement questionnaire |
| Reflection                                     | Post-placement questionnaire |
| Contact with loved ones                        | Post-placement questionnaire |
| Support                                        | Post-placement questionnaire |
| Number of projects in facility                 | Post-placement questionnaire |
| General experience                             | Post-placement questionnaire |
| Ability to cope with NHS paperwork upon return | Post-placement questionnaire |
| Less interest in profession upon return        | Post-placement questionnaire |
| Desire to leave NHS/UK upon return             | Post-placement questionnaire |
| Recognition/Accreditation upon return          | Post-placement questionnaire |
| Employment status upon return                  | Post-placement questionnaire |
| Returner schemes upon return                   | Post-placement questionnaire |
| Influence on career path upon return           | Post-placement questionnaire |

## **Table 4 : results of cognitive interviews**

| <b>Statement</b>                                           | <b>Comment</b>                                                                      | <b>Action taken (or reason not )</b>                                                                                          |
|------------------------------------------------------------|-------------------------------------------------------------------------------------|-------------------------------------------------------------------------------------------------------------------------------|
| Frequently/constantly                                      | interchangable                                                                      | Decision was made on purpose                                                                                                  |
| I exchanged ideas with colleagues from a different culture | Red herring- exchanged                                                              | Choose Exchanged, as communicated could mean asking what time the bus arrives, want this to represent meaningful conversation |
| I feel I've developed a new perspective                    | Doesn't really make sense pre-placement, need to use more examples to contextualise | Participant used, having some kind of revelation, include this as an example                                                  |
| I anticipated future problems                              | ... and took necessary action                                                       | Decided to take participants advice here, and add took necessary action as anticipating them alone is not enough              |
| Skills, limitations and beliefs                            | too much for one sentence                                                           | remove beliefs                                                                                                                |
| I provided excellent high quality care                     | Excellent and high quality are the same remove excellent                            | Remove excellent                                                                                                              |

|                                                                                                                                    |                                                                                                 |                                                                             |
|------------------------------------------------------------------------------------------------------------------------------------|-------------------------------------------------------------------------------------------------|-----------------------------------------------------------------------------|
| I am able to find solutions despite limited resources                                                                              | What if don't have limited resources i.e. in UK                                                 | Leave as is, participants won't agree if have adequate resources            |
| I have tried to understand somebody else's POV                                                                                     | I have understood somebody else's POV                                                           | Remove tried                                                                |
| I have demonstrated patience and tolerance                                                                                         | Need time marker                                                                                | Change to -I have frequently demonstrated patience and tolerance            |
| I relied heavily on the basic skills of my profession                                                                              | Need more examples                                                                              | Include low tech and intuitive                                              |
| I lost some confidence in my clinical practice                                                                                     | Change to: Sometimes I feel I have forgotten the things I have learnt                           | Leave as is, participants will know what clinical practice is               |
| I thought about and appreciated                                                                                                    | Maybe use just appreciated                                                                      | change                                                                      |
| I think I have developed bad work habits                                                                                           | Remove 'I think' and include some                                                               | I have developed some bad work habits                                       |
| I actively managed risk, including anticipating risk and evaluating environment                                                    | Too much- change to I anticipated risk and actively managed it                                  | I anticipated risk and actively managed it (e.g. evaluating environment)    |
| I frequently managed projects                                                                                                      |                                                                                                 | Include e.g. (including one continuous project, or components of a project) |
| I managed one or more situations that I consider to be a tragedy                                                                   | Chance to tragic situations                                                                     | Leave as is                                                                 |
| I established communication systems (formal and informal)                                                                          | What about if they are already established                                                      | Changed to established/used                                                 |
| I changed the way I speak so that somebody can understand me                                                                       | Change to I have adapted my communication to suit to context                                    | Leave as is, too much jargon in suggestion                                  |
| I frequently had to rely on my non-verbal communication                                                                            | I frequently relied on my non-verbal communication                                              | Change                                                                      |
| I demonstrated that I am highly skilled in challenging conversations and effective communication, even in high pressure situations | I demonstrated that I am skilled in challenging conversations, even in high pressure situations | Removed some to make it more understandable                                 |
| I dealt with difficult people                                                                                                      | Include frequently                                                                              | I frequently dealt with difficult people                                    |
| I demonstrated that I am able to manage difficult people                                                                           | I demonstrated that I am able to manage difficult people effectively                            | Add in effectively                                                          |
| I taught clinical colleagues                                                                                                       | (of any profession at any career stage)                                                         | Add in brackets                                                             |
| Perceptions of yourself                                                                                                            | Change to About you – and change the other to demographics                                      | Change                                                                      |
| When I work clinically I am frequently thinking about basic scientific principles (e.g. physiology, cell biology, biochemistry)    | Change e.g's                                                                                    | Physiology, chemistry                                                       |
| I have a good knowledge of how healthcare systems outside of the UK function                                                       | I have an awareness of how other healthcare systems (outside of the UK) function                | Change- as most people will only know 1 or 2 countries not all              |

|                                                                                                               |                                                                                             |                                                                                                                                                                                                                                                                                                                                                               |
|---------------------------------------------------------------------------------------------------------------|---------------------------------------------------------------------------------------------|---------------------------------------------------------------------------------------------------------------------------------------------------------------------------------------------------------------------------------------------------------------------------------------------------------------------------------------------------------------|
| I have a professional network that includes people from around the world                                      | Change to other countries                                                                   | May not be around the world, just in 1 or 2 countries                                                                                                                                                                                                                                                                                                         |
| I tend to develop a good understanding of how organisations can work                                          | Change to I have                                                                            | Tend to confuses things                                                                                                                                                                                                                                                                                                                                       |
| I am someone who focuses on solutions not problems                                                            | Comments that no-one would answer no to this                                                | Then it would disappear in the psychometrics and statistics so leave                                                                                                                                                                                                                                                                                          |
| I have an excellent work ethic                                                                                | Comments to change to conscientious                                                         | Will not change means something different                                                                                                                                                                                                                                                                                                                     |
| I keep trying when things are difficult                                                                       | Comments to change to persevere                                                             | Yes keep simple                                                                                                                                                                                                                                                                                                                                               |
| I have an excellent understanding of the roles and responsibilities of all the professional staff I work with | Change to clear                                                                             | I have a clear understanding of the roles and responsibilities of all the professional staff I work with                                                                                                                                                                                                                                                      |
| I am quick to judge other people                                                                              | Add admit and sometimes                                                                     | I admit I am sometimes quick to judge other people                                                                                                                                                                                                                                                                                                            |
| I believe I have the ability to empower patients to help themselves                                           | I am able to empower patients to help themselves, also patients isn't the word midwives use | Remove believe as adds another dimension, keep patients as it is obvious who we mean to that 1 group                                                                                                                                                                                                                                                          |
| I believe I have the ability to empower colleagues to help themselves                                         | I am able empower colleagues to help themselves                                             | Remove believe as adds another dimension                                                                                                                                                                                                                                                                                                                      |
| In my work I have demonstrated skills in changing patients behaviour                                          | In encouraging and supporting patients to change behaviour                                  | Change to -In my work I have demonstrated skills in encouraging and supporting patients to change behaviour                                                                                                                                                                                                                                                   |
| Its crucial to consciously make an effort to get on with colleagues                                           | Add 'I feel'                                                                                | No need to add 'I feel' adds another dimension                                                                                                                                                                                                                                                                                                                |
| I demonstrated that I am capable of getting the most out of people                                            | Change to 'best' move to 'in the last month'                                                | Change to - I demonstrated that I am capable of getting the best out of people- move to last month, add enabling into e.g's                                                                                                                                                                                                                                   |
| Community participation is crucial...                                                                         | Add I feel                                                                                  | No need to add 'I feel' adds another dimension                                                                                                                                                                                                                                                                                                                |
| Job satisfaction                                                                                              | Use validated single item- Taking everything into consideration, I am satisfied with my job | Reliability and Validity of a Single-Item Measure of Job Satisfaction Christyn L. Dolbier, PhD; Judith A. Webster, MSN; Katherine T. McCalister, EdD; Mark W. Mallon, MS; Mary A. Steinhardt, EdD, LPC<br><br>an adaptation of the one in the literature that correlates with other larger measures, to suit the current format of an agreement likert scale? |
| Life satisfaction                                                                                             | Instead use 5 item validated SWLS scale                                                     | Ed Diener, Robert A. Emmons, Randy J. Larsen and Sharon Griffin as noted in the 1985 article in the <i>Journal of Personality Assessment</i>                                                                                                                                                                                                                  |

|                                                                                                                                     |                                                                                                                                                                          |                                                                                                                                                                                                                                                                                                     |
|-------------------------------------------------------------------------------------------------------------------------------------|--------------------------------------------------------------------------------------------------------------------------------------------------------------------------|-----------------------------------------------------------------------------------------------------------------------------------------------------------------------------------------------------------------------------------------------------------------------------------------------------|
| I sometimes I felt like an outsider                                                                                                 | I sometimes felt like an outsider in my environment                                                                                                                      | Add in my environment to make it more contextualised, move to culture area rather than life satisfaction as it seems less intrusive                                                                                                                                                                 |
| In my ability to manage situations that I consider to be awful, tragic or difficult                                                 | Remove awful, too many words                                                                                                                                             | In my ability to manage situations that I consider to be tragic or difficult                                                                                                                                                                                                                        |
| In my ability to manage myself                                                                                                      | Expand into 2:<br>In my ability to manage myself in a clinical environment<br>In my ability to manage myself in life generally (e.g. time management, managing emotions) | Split into 2                                                                                                                                                                                                                                                                                        |
| In my ability to adapt and be flexible in work                                                                                      | Would be different for clinical and everything else – pp more confident<br>In ability to be flexible clinically                                                          | Separated                                                                                                                                                                                                                                                                                           |
| In my ability to find solutions despite limited resources                                                                           | See above comment about 'despite'                                                                                                                                        | Maybe as this is confidence have, ability to find solutions in an environment with limited resources, the above one could literally say, in the last month I have had to find solutions in an environment with limited resources, then we expect low scores pre, and high during and possibly post. |
| That I can apply my clinical knowledge in any health systems                                                                        | Change any to another                                                                                                                                                    | That I can apply my clinical knowledge in another health system                                                                                                                                                                                                                                     |
| In my ability to work within an unfamiliar power dynamic                                                                            | Don't quite understand the question, suggested are you affected by power dynamics                                                                                        | Are you affected would change the question. move to in the last month, have been affected by power dynamics and one about dealing with it appropriately                                                                                                                                             |
| In my workplace                                                                                                                     | Remove place                                                                                                                                                             | Change to in my work                                                                                                                                                                                                                                                                                |
| In my ability to disseminate best practice globally                                                                                 | Globally too big, maybe across a wider context (e.g. to other countries)                                                                                                 | Change to disseminate UK best practice to other countries                                                                                                                                                                                                                                           |
| Career Stage                                                                                                                        | Louise and John had- experienced, mid etc.                                                                                                                               | Change to year of registration free text                                                                                                                                                                                                                                                            |
| Nationality                                                                                                                         | British, European, non-eu (LMIC) non-EU (high income)                                                                                                                    | Change to free text                                                                                                                                                                                                                                                                                 |
| Project Name                                                                                                                        | Make non-mandatory and ask to describe in one sentence project- e.g. RCM project in Uganda based in Mulago Hospital                                                      | in a sentence describe the title of your project and where it takes place e.g., RCM mentoring project in Mulago Hospital, Uganda. Or Milton Keynes Hospital Trust training project in University of City, Country                                                                                   |
| I would feel comfortable working in a high risk situations                                                                          | Comment- Is the risk to the patient or the volunteer                                                                                                                     | High risk situation is well defined                                                                                                                                                                                                                                                                 |
| I agreed with and internationalised lots of the knowledge, skills, behaviours and attitudes of the other staff in the host facility | Too confusing                                                                                                                                                            | Simplify sentence                                                                                                                                                                                                                                                                                   |

|                                                                                                                                                                                                      |                                                                                                                                                                                                                                                                                                                                              |                                                                                                                                                                                  |
|------------------------------------------------------------------------------------------------------------------------------------------------------------------------------------------------------|----------------------------------------------------------------------------------------------------------------------------------------------------------------------------------------------------------------------------------------------------------------------------------------------------------------------------------------------|----------------------------------------------------------------------------------------------------------------------------------------------------------------------------------|
| At least once I questioned by view of reality                                                                                                                                                        | Confusing- changed answer after I explained                                                                                                                                                                                                                                                                                                  | Change to at least once I have been aware of my opinions or perspectives changing in a profound way'                                                                             |
| Which of the following were correct about local staff:<br><br>I engaged with them frequently<br><br>There was frequently a more knowledgeable person than me around<br><br>We had many shared values | Reword- seems like everyone would agree<br><br>Too Context Specific<br><br>Said they did but didn't act on it                                                                                                                                                                                                                                | This is about Vygotsky's MKO, could we separate into 2- more clinically knowledgeable, more culturally knowledgeable<br><br>change to, it was obvious we had many shared values? |
| Health consequences (animal bites, injuries, illness)                                                                                                                                                | Remove animal bites, gets confused with mosquito bites which most people would get                                                                                                                                                                                                                                                           | Remove animal bites                                                                                                                                                              |
| I feel unable to cope with NHS paperwork                                                                                                                                                             | Not to do with placement                                                                                                                                                                                                                                                                                                                     | Doesn't matter? If it's not to do with placement, then we will see that it is the same before and after?                                                                         |
| I would like to leave the NHS to work overseas                                                                                                                                                       | Not all employed by NHS                                                                                                                                                                                                                                                                                                                      | Change to NHS/UK                                                                                                                                                                 |
|                                                                                                                                                                                                      |                                                                                                                                                                                                                                                                                                                                              |                                                                                                                                                                                  |
| Project Managers:                                                                                                                                                                                    |                                                                                                                                                                                                                                                                                                                                              |                                                                                                                                                                                  |
| Which of the following describe the relationship between your organisation and the receiving organisation:<br>We depend on each other                                                                | Weird statement<br><br>Add in well maintained relationships with local staff and leadership<br>Links with local experts                                                                                                                                                                                                                      | Remove                                                                                                                                                                           |
| Does your project have links with local experts and well maintained relationships with local staff and leadership                                                                                    | Move to earlier Q                                                                                                                                                                                                                                                                                                                            | Move to earlier Q                                                                                                                                                                |
| What type of preparation do volunteers receive?                                                                                                                                                      | Add all<br><br>Change options to:<br>Contact with previous volunteers<br>Formal training and preparation events in the UK<br>Informal training and preparation events in the UK<br>Formal training and preparation events in host country<br>Informal training and preparation events in country<br>Handbook or written preparation<br>Other | What type of preparation do all volunteers receive? – otherwise one or two might get it<br><br>Change options                                                                    |



|                                                                                                                                                                                   |                                                                                                                                                                                                                                                                                                |                                                                                                                                                                                                                                                                 |
|-----------------------------------------------------------------------------------------------------------------------------------------------------------------------------------|------------------------------------------------------------------------------------------------------------------------------------------------------------------------------------------------------------------------------------------------------------------------------------------------|-----------------------------------------------------------------------------------------------------------------------------------------------------------------------------------------------------------------------------------------------------------------|
|                                                                                                                                                                                   |                                                                                                                                                                                                                                                                                                |                                                                                                                                                                                                                                                                 |
| What is the main focus of your project:<br>Service delivery<br>Capacity Building<br>Development<br>Sustainability<br>Training<br>Other                                            | Most would tick all                                                                                                                                                                                                                                                                            | Change to separate question:<br><br>How important is sustainability/service delivery/capacity building to your project<br>– Very Important • Important • Moderately Important • Slightly Important • Not Important<br><br>Remove training development and other |
| Who was involved/consulting during development of aims, focus, structure, project tasks within your project                                                                       | Remove 'within your project'<br><br>In example grey area (at some stage)<br><br>Change health policy makers and management in LMIC to Management in LMIC<br>Local government and policy makers                                                                                                 | Change                                                                                                                                                                                                                                                          |
| Do you volunteers take recurring trips?                                                                                                                                           | Change options                                                                                                                                                                                                                                                                                 | Always<br>Very Often<br>Sometimes<br>Rarely<br>Never                                                                                                                                                                                                            |
| In the last year have any volunteers dropped out of your project?                                                                                                                 | Remove as too context specific could be illness etc                                                                                                                                                                                                                                            | Remove question                                                                                                                                                                                                                                                 |
| Is volunteer learning incorporated into project or assessed?                                                                                                                      | Comment- Add informal reporting and learning                                                                                                                                                                                                                                                   | Do you formally assess volunteer learning or professional or personal development? And then time points                                                                                                                                                         |
| How many volunteers are placed at one time within this project                                                                                                                    | Add on average                                                                                                                                                                                                                                                                                 | Add on average                                                                                                                                                                                                                                                  |
| How would you describe your organisation?                                                                                                                                         | Change list- does not encompass all, make tick box: <ul style="list-style-type: none"> <li>• New organisation</li> <li>• Established organisation</li> <li>• Hospital or university link (health partnership)</li> <li>• Commercial/profit making</li> <li>• Not for profit/charity</li> </ul> |                                                                                                                                                                                                                                                                 |
| Which of the following describe the relationship between your organisation and the receiving organisation?<br>We depend on one another<br>We are especially good at collaboration | Remove depend statement, weird and out of context<br>Change collaboration one to we work well in collaboration                                                                                                                                                                                 | Change                                                                                                                                                                                                                                                          |

|                                                                                               |                                                                                                                                                      |                                                                                                         |
|-----------------------------------------------------------------------------------------------|------------------------------------------------------------------------------------------------------------------------------------------------------|---------------------------------------------------------------------------------------------------------|
| To the best of your knowledge, what income level is the host country?                         |                                                                                                                                                      | Remove now as we will code countries                                                                    |
| Do restructure of questions so similar are together                                           |                                                                                                                                                      | Do restructure                                                                                          |
|                                                                                               |                                                                                                                                                      |                                                                                                         |
| Add to post-placement                                                                         |                                                                                                                                                      |                                                                                                         |
| Which country was your placement in- free text                                                |                                                                                                                                                      | Add                                                                                                     |
| What support do your volunteers receive?<br><br>A local or western expert to provide feedback | Change to Have access to – move to volunteer post<br><br>Change to: an opportunity to get frequent feedback from a local or western senior colleague | Change to have access to and move to post placement- what support did you have access to?<br><br>Change |
| Are you the only project working in the healthcare facility                                   | Was yours the only project working in the healthcare facility                                                                                        | Change and more to post placement                                                                       |
| Length of stay                                                                                |                                                                                                                                                      | Move length of stay to Post placement                                                                   |
| Recurring visits                                                                              |                                                                                                                                                      | Move to post placement                                                                                  |

**Table 5: How participants were recruited through collaborative organisations**

| Organisation        | Method of distribution of questionnaire                                                                                       | Target Group        | Number of people that had opportunity to engage                   |
|---------------------|-------------------------------------------------------------------------------------------------------------------------------|---------------------|-------------------------------------------------------------------|
| Ambulance Station 1 | Attended with paper versions                                                                                                  | All groups          | 15                                                                |
| Conference 1        | Handed out paper versions at conference, presented online link at conference, online link sent by contact within organisation | All groups          | Up to 400 on mailing list (who may have also attended conference) |
| Field Hospital 1    | Online link sent by contact within organisation                                                                               | Returned Volunteers | 180                                                               |
| Field Hospital 2    | Online Link sent by contact within organisation                                                                               | Returned Volunteers | 50                                                                |
| Field Hospital 3    | Attended event with paper version                                                                                             | All groups          | 6                                                                 |

|                                  |                                                                                                                       |                                          |                                    |
|----------------------------------|-----------------------------------------------------------------------------------------------------------------------|------------------------------------------|------------------------------------|
| Field Hospitals 4                | Online Link sent by contact within organisation                                                                       | All groups                               | 80                                 |
| General Practice 1               | Attended with paper versions                                                                                          | All groups                               | 4                                  |
| Health Partnership 1             | Online Link sent by contact within organisation                                                                       | Current Volunteers                       | 2                                  |
| Health Partnership 2             | Online Link sent by contact within organisation                                                                       | All groups                               | 6                                  |
| Health Partnership 3             | Online Link sent by contact within organisation, also asked to send to one colleague with no international experience | Returned and no international experience | 50                                 |
| Health Partnership 4             | Online Link sent by contact within organisation                                                                       | Pre Placement                            | Awaiting Response                  |
| Health Partnership 5             | Online Link sent by contact within organisation                                                                       | All groups                               | 6                                  |
| Health Partnership 6             | Online Link sent by contact within organisation                                                                       | All groups                               | 15                                 |
| Hospital 1                       | Online Link sent by contact within organisation                                                                       | All groups                               | 30                                 |
| Hospital 2                       | Attended induction events with paper versions                                                                         | All groups                               | 85                                 |
| Individual Influencer 1          | Posted link to personal twitter and emailed 7 colleagues                                                              | All groups                               | 182 twitter followers 7 colleagues |
| Online Community of Practice 1   | Posted link to Community of Practice Online group                                                                     | All groups                               | 297 members                        |
| Previous Research Participants 1 | Link sent by researcher directly to participants                                                                      | All groups                               | 290                                |
| Previous Research Participants 2 | Link sent directly to email addresses                                                                                 | All groups                               | 59                                 |
| Professional Network 1           | Link distributed in E bulletin                                                                                        | All groups                               | 374 opened link (sent to 1800)     |

|                         |                                                                                                                |                     |                                               |
|-------------------------|----------------------------------------------------------------------------------------------------------------|---------------------|-----------------------------------------------|
| Professional Network 2  | Online Link sent by contact within organisation                                                                | All groups          | Awaiting response                             |
| Recruitment Event 1     | Attended event with paper versions                                                                             | All groups          | 15                                            |
| Recruitment Event 2     | Attended event with paper versions                                                                             | All groups          | 18                                            |
| Royal College 1         | Online Link sent by contact within organisation                                                                | Returned Volunteers | 70                                            |
| Royal College 2         | Online link sent by one member to a select few relevant individuals<br>Conference attended with paper versions | Returned Volunteers | 11                                            |
| Royal College 3         | Online Link sent by contact within organisation                                                                | Returned Volunteers | 19                                            |
| Royal College 4         | Link sent directly to group members email addresses                                                            | All groups          | 45                                            |
| Royal College 5         | Online Link sent by contact within organisation                                                                | All groups          | 437                                           |
| Royal College 6         | Link posted on global health facebook group                                                                    | All groups          | 79 in group                                   |
| The Royal College 7     | Link posted on blog and to twitter                                                                             | All groups          | 1000 blog followers,<br>400 twitter followers |
| Trust 1                 | Online Link sent by contact within organisation                                                                | Returned Volunteers | 43                                            |
| University Alumni 1     | Link posted to Facebook, Twitter and LinkedIn groups                                                           | All groups          | 1000+                                         |
| University Department 1 | Online Link sent by contact within organisation<br>(stated was only for qualified health professionals)        | All groups          | 270                                           |

|                         |                                                 |                             |     |
|-------------------------|-------------------------------------------------|-----------------------------|-----|
| University Department 2 | Online Link sent by contact within organisation | No international experience | 21  |
| University Department 3 | Online Link sent by contact within organisation | No international experience | 37  |
| University Department 4 | Paper versions handed out at end of lecture     | All groups                  | 17  |
| University Department 5 | Online Link sent by contact within organisation | All groups                  | 55  |
| University Department 6 | Online Link posted on students forum            | All groups                  | 500 |
| Volunteer Project 1     | Online Link sent by contact within organisation | Current Volunteers          | 9   |
| Volunteer Project 2     | Online Link sent by contact within organisation | All groups                  | 116 |
| Volunteer Project 3     | Online Link sent by contact within organisation | Pre placement               | 5   |
| Volunteer Project 4     | Online Link sent by contact within organisation | All groups                  | 4   |
| Volunteer Project 5     | Online Link sent by contact within organisation | Returned Volunteers         | 35  |

**Table 6: Staff Group x International Experience**

| Staff group                 | Past international experience | Currently internationally working | No experience - interested | No experience- not interested | Planned future international experience |     |
|-----------------------------|-------------------------------|-----------------------------------|----------------------------|-------------------------------|-----------------------------------------|-----|
| Medical and Dental          | 77                            | 20                                | 10                         | 7                             | 32                                      | 146 |
| Nursing and Midwifery       | 51                            | 2                                 | 39                         | 31                            | 13                                      | 136 |
| Allied Health Professionals | 23                            | 4                                 | 12                         | 17                            | 9                                       | 65  |
| Healthcare Scientists       | 6                             | 0                                 | 1                          | 5                             | 1                                       | 13  |
| Ambulance                   | 2                             | 0                                 | 1                          | 10                            | 1                                       | 14  |

|                                           |   |   |   |    |   |    |
|-------------------------------------------|---|---|---|----|---|----|
| Support to clinical staff (HCAs)          | 0 | 0 | 8 | 22 | 0 | 30 |
| NHS infrastructure support                | 1 | 0 | 3 | 1  | 0 | 5  |
| Other scientific, therapeutic & technical | 8 | 0 | 4 | 9  | 5 | 26 |
| Other                                     | 1 | 0 | 0 | 2  | 0 | 3  |

**Table 7 – Correlation coefficients between the latent variables. their standard errors and *p*-values. according to the proposed multidimensional item response theory model.**

|                         | Estimate | S.E.  | <i>p</i> -value<br>(two tailed) |
|-------------------------|----------|-------|---------------------------------|
| LIFE SATISFACTION       | WITH     |       |                                 |
| CONFIDENCE              | 0.295    | 0.045 | 0.000                           |
| CULTURAL                | WITH     |       |                                 |
| CONFIDENCE              | 0.41     | 0.044 | 0.000                           |
| LIFE SATISFACTION       | 0.223    | 0.051 | 0.000                           |
| ADAPTING COMMUNICATION  | WITH     |       |                                 |
| CONFIDENCE              | 0.12     | 0.044 | 0.000                           |
| LIFE SATISFACTION       | 0.223    | 0.049 | 0.000                           |
| CULTURAL                | 0.497    | 0.043 | 0.000                           |
| TEACHING                | WITH     |       |                                 |
| CONFIDENCE              | 0.662    | 0.031 | 0.000                           |
| LIFE SATISFACTION       | 0.208    | 0.049 | 0.000                           |
| CULTURAL                | 0.29     | 0.051 | 0.000                           |
| ADAPTING COMMUNICATION  | 0.319    | 0.048 | 0.000                           |
| DIFFICULT COMMUNICATION | WITH     |       |                                 |
| CONFIDENCE              | 0.518    | 0.035 | 0.000                           |
| LIFE SATISFACTION       | 0.196    | 0.046 | 0.000                           |

|                                    | Estimate | S.E.  | <i>p</i> -value<br>(two tailed) |
|------------------------------------|----------|-------|---------------------------------|
| CULTURAL                           | 0.412    | 0.045 | 0.000                           |
| ADAPTING COMMUNICATION<br>TEACHING | 0.58     | 0.037 | 0.000                           |
|                                    | 0.44     | 0.04  | 0.000                           |
| BEHAVIOUR CHANGE<br>WITH           |          |       |                                 |
| CONFIDENCE                         | 0.638    | 0.027 | 0.000                           |
| LIFE SATISFACTION                  | 0.289    | 0.045 | 0.000                           |
| CULTURAL                           | 0.397    | 0.051 | 0.000                           |
| ADAPTING COMMUNICATION             | 0.427    | 0.041 | 0.000                           |
| TEACHING                           | 0.554    | 0.035 | 0.000                           |
| DIFFICULT COMMUNICATION            | 0.558    | 0.035 | 0.000                           |
| MANAGEMENT<br>WITH                 |          |       |                                 |
| CONFIDENCE                         | 0.563    | 0.035 | 0.000                           |
| LIFE SATISFACTION                  | 0.113    | 0.051 | 0.025                           |
| CULTURAL                           | 0.367    | 0.051 | 0.000                           |
| ADAPTING COMMUNICATION             | 0.436    | 0.043 | 0.000                           |
| TEACHING                           | 0.545    | 0.036 | 0.000                           |
| DIFFICULT COMMUNICATION            | 0.54     | 0.038 | 0.000                           |
| BEHAVIOUR CHANGE                   | 0.364    | 0.044 | 0.000                           |
| TEAM WORK<br>WITH                  |          |       |                                 |
| CONFIDENCE                         | 0.757    | 0.028 | 0.000                           |
| LIFE SATISFACTION                  | 0.362    | 0.049 | 0.000                           |
| CULTURAL                           | 0.497    | 0.047 | 0.000                           |
| ADAPTING COMMUNICATION             | 0.522    | 0.043 | 0.000                           |
| TEACHING                           | 0.577    | 0.037 | 0.000                           |
| DIFFICULT COMMUNICATION            | 0.653    | 0.036 | 0.000                           |
| BEHAVIOUR CHANGE                   | 0.658    | 0.034 | 0.000                           |
| MANAGEMENT                         | 0.696    | 0.032 | 0.000                           |
| FLEXIBILITY<br>WITH                |          |       |                                 |

---

|                         | Estimate | S.E.  | <i>p</i> -value<br>(two tailed) |
|-------------------------|----------|-------|---------------------------------|
| CONFIDENCE              | 0.571    | 0.033 | 0.000                           |
| LIFE SATISFACTION       | 0.198    | 0.044 | 0.000                           |
| CULTURAL                | 0.492    | 0.039 | 0.000                           |
| ADAPTING COMMUNICATION  | 0.475    | 0.04  | 0.000                           |
| TEACHING                | 0.423    | 0.041 | 0.000                           |
| DIFFICULT COMMUNICATION | 0.497    | 0.038 | 0.000                           |
| BEHAVIOUR CHANGE        | 0.514    | 0.034 | 0.000                           |
| MANAGEMENT              | 0.527    | 0.036 | 0.000                           |
| TEAM WORK               | 0.705    | 0.03  | 0.000                           |

---
